# Supplementary material for: Peer review of the pesticide risk assessment of the active substance alpha‐cypermethrin
Source: PubMed Central journal article supplement (PMC7009707; doi:10.2903/j.efsa.2018.5403), 2018-09-10
Supplement: EFS2-16-e05403-s001.pdf [file EFS2-16-e05403-s001.pdf]

Appendix to:

EFSA (European Food Safety Authority), 2018. Conclusion on the peer review of the pesticide risk assessment of the active substance Alpha-cypermethrin. EFSA Journal 2018;16(8):5403, 39 pp. doi:10.2903/j.efsa.2018.5403

© European Food Safety Authority, 2018

## List of end points for the active substance and the representative formulation

### Identity, Physical and Chemical Properties, Details of Uses, Further Information (Regulation (EU) N° 283/2013, Annex Part A, points 1.3 and 3.2)

|                                    |                    |
|------------------------------------|--------------------|
| Active substance (ISO Common Name) | Alpha-cypermethrin |
| Function ( <i>e.g.</i> fungicide)  | Insecticide        |
| Rapporteur Member State            | Belgium            |
| Co-rapporteur Member State         | Greece             |

### Identity (Regulation (EU) N° 283/2013, Annex Part A, point 1)

|                                                                                                                                           |                                                                                                                                                                                                                                                                                                                                                                                                                                                                                                                                                                                         |
|-------------------------------------------------------------------------------------------------------------------------------------------|-----------------------------------------------------------------------------------------------------------------------------------------------------------------------------------------------------------------------------------------------------------------------------------------------------------------------------------------------------------------------------------------------------------------------------------------------------------------------------------------------------------------------------------------------------------------------------------------|
| Chemical name (IUPAC)                                                                                                                     | Racemate comprising<br>( <i>R</i> )- $\alpha$ -cyano-3-phenoxybenzyl (1 <i>S</i> ,3 <i>S</i> )-3-(2,2-dichlorovinyl)-2,2-dimethylcyclopropanecarboxylate and<br>( <i>S</i> )- $\alpha$ -cyano-3-phenoxybenzyl (1 <i>R</i> ,3 <i>R</i> )-3-(2,2-dichlorovinyl)-2,2-dimethylcyclopropanecarboxylate<br>or<br>( <i>R</i> )- $\alpha$ -cyano-3 phenoxybenzyl-(1 <i>S</i> )- <i>cis</i> -3-(2,2-dichlorovinyl)-2,2-dimethylcyclopropanecarboxylate<br>and ( <i>S</i> )- $\alpha$ -cyano-3 phenoxybenzyl-(1 <i>R</i> )- <i>cis</i> -3-(2,2-dichlorovinyl)-2,2-dimethylcyclopropanecarboxylate |
| Chemical name (CA)                                                                                                                        | ( <i>R</i> )-cyano(3-phenoxyphenyl)methyl (1 <i>S</i> ,3 <i>S</i> )- <i>rel</i> -3-(2,2-dichloroethenyl)-2,2-dimethylcyclopropanecarboxylate<br>( <i>Cis-II isomeric pair of cypermethrin</i> )                                                                                                                                                                                                                                                                                                                                                                                         |
| CIPAC No                                                                                                                                  | 454                                                                                                                                                                                                                                                                                                                                                                                                                                                                                                                                                                                     |
| CAS No                                                                                                                                    | [67375-30-8]                                                                                                                                                                                                                                                                                                                                                                                                                                                                                                                                                                            |
| EC No (EINECS or ELINCS)                                                                                                                  | Not allocated                                                                                                                                                                                                                                                                                                                                                                                                                                                                                                                                                                           |
| FAO Specification (including year of publication)                                                                                         | 454/TC (2013) min. 930 g/kg                                                                                                                                                                                                                                                                                                                                                                                                                                                                                                                                                             |
| Minimum purity of the active substance as manufactured                                                                                    | 980 g/kg                                                                                                                                                                                                                                                                                                                                                                                                                                                                                                                                                                                |
| Identity of relevant impurities (of toxicological, ecotoxicological and/or environmental concern) in the active substance as manufactured | hexane max. 1 g/kg (not of concern at this level)                                                                                                                                                                                                                                                                                                                                                                                                                                                                                                                                       |
| Molecular formula                                                                                                                         | C <sub>22</sub> H <sub>19</sub> Cl <sub>2</sub> NO <sub>3</sub>                                                                                                                                                                                                                                                                                                                                                                                                                                                                                                                         |

Molar mass

416.3 g/mol

Structural formula

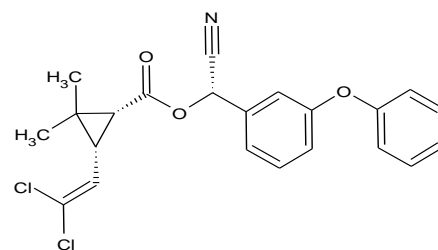[1*R cis* α*S*]

+

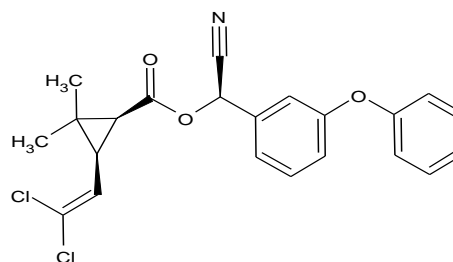[1*S cis* α*R*]

Note:

**1*R,S*** describes the configuration at the carboxyl-bearing carbon atom (C-1) of the cyclopropane ring;  
**cis/trans** describes the relationship to this carboxyl of the dichlorovinyl group at C-3;  
**α*R,S*** describes the configuration at the 'alpha' (α) position, i.e. the carbon atom bearing the nitrile (-CN, cyano) functional group. By the C.A. denomination, this configuration is described by **1*R*** or **1*S***.

**Physical and chemical properties (Regulation (EU) N° 283/2013, Annex Part A, point 2)**

|                                                                     |                                                                                                                                                                                                                                                                  |
|---------------------------------------------------------------------|------------------------------------------------------------------------------------------------------------------------------------------------------------------------------------------------------------------------------------------------------------------|
| Melting point (state purity)                                        | 82.1 °C (99.3%)                                                                                                                                                                                                                                                  |
| Boiling point (state purity)                                        | Cannot be determined at atmospheric pressure<br>(a.s. decomposes at approx. 248°C)                                                                                                                                                                               |
| Temperature of decomposition (state purity)                         | Approx. 248°C (99.3%)                                                                                                                                                                                                                                            |
| Appearance (state purity)                                           | Purified a.s. (99.8%): fine powder (solid), white, non-detectable odour<br>a.s. as manufactured (96.3% ) : crystalline powder (solid), creamy white, slight chemical odour                                                                                       |
| Vapour pressure (state temperature, state purity)                   | 3.8 x 10 <sup>-7</sup> Pa at 20°C (99.3%)<br>8.5 x 10 <sup>-7</sup> Pa at 25°C (99.3%)                                                                                                                                                                           |
| Henry's law constant (state temperature)                            | 0.053 Pa m <sup>3</sup> mol <sup>-1</sup> (20°C)                                                                                                                                                                                                                 |
| Solubility in water (state temperature, state purity and pH)        | at 20°C (98%):<br>0.67 µg/L (pH 4)<br>3.97 µg/L (pH 7)<br>4.54 µg/L (pH 9)<br>1.25 µg/L (double distilled water)<br><br>At 20°C (99.3%)<br>3 µg/L (pH 6.5)                                                                                                       |
| Solubility in organic solvents (state temperature, state purity)    | at 24°C (99.3%)<br>toluene > 250 g/L solvent<br>dichloromethane > 250 g/L solvent<br>acetone > 250 g/L solvent<br>ethyl acetate > 250 g/L solvent<br><i>n</i> -heptane 10 – 14 g/L solvent<br>methanol 25 – 29 g/L solvent<br>acetonitrile 200 – 250 g/L solvent |
| Surface tension (state concentration and temperature, state purity) | Not applicable, as alpha-cypermethrin technical is solid at ambient temperature and water solubility is < 1 mg/L                                                                                                                                                 |
| Partition coefficient (state temperature, pH and purity)            | log Pow = 5.8 (99.3%)<br>no effect of pH (no dissociation)                                                                                                                                                                                                       |
| Dissociation constant (state purity)                                | no dissociation of the a.s.                                                                                                                                                                                                                                      |
| UV/VIS absorption (max.) incl. ε (state purity, pH)                 | at λ <sub>max</sub> (276 nm): ε = 2073 L.mol <sup>-1</sup> .cm <sup>-1</sup><br>at 300 nm : ε = 38.64 L.mol <sup>-1</sup> .cm <sup>-1</sup>                                                                                                                      |
| Flammability (state purity)                                         | not highly flammable (97.3%)                                                                                                                                                                                                                                     |
| Explosive properties (state purity)                                 | not explosive (97.3%)                                                                                                                                                                                                                                            |
| Oxidising properties (state purity)                                 | not oxidising (97.3%)                                                                                                                                                                                                                                            |

**Summary of representative uses evaluated, for which all risk assessments needed to be completed (name of active substance or the respective variant)  
(Regulation (EU) N° 284/2013, Annex Part A, points 3, 4)**

| Crop and/or situation (a)                     | Member State             | Product Name             | F G I (b) | Pests or group of pests controlled (c)                                                                                                                                                                                                                                                   | Formulation |                       | Application       |                             |                    | Application rate per treatment      |                          |                    | PHI (days) (l) | Remarks (m) |                                                 |
|-----------------------------------------------|--------------------------|--------------------------|-----------|------------------------------------------------------------------------------------------------------------------------------------------------------------------------------------------------------------------------------------------------------------------------------------------|-------------|-----------------------|-------------------|-----------------------------|--------------------|-------------------------------------|--------------------------|--------------------|----------------|-------------|-------------------------------------------------|
|                                               |                          |                          |           |                                                                                                                                                                                                                                                                                          | Type (d-f)  | Conc of a.i. g/kg (i) | Method kind (f-h) | Growth stage and season (j) | Number min max (k) | Interval between applications (min) | g a.i./hl min max (g/hl) | Water l/ha min max |                |             | a.i./ha min max (*) (g/ha)                      |
| Cereals (barley, wheat, oats, rye, triticale) | North-/Central-/South-EU | FASTAC ME (BAS 310 55 I) | F         | Chewing and Sucking Pests<br><i>RHOPPA</i><br><i>Rhopalosiphum padi</i><br><i>METODR</i><br><i>Metopolophium dirhodum</i><br><i>MACSAV</i><br><i>Sitobion avenae</i><br><i>LEMAME</i><br><i>Oulema melanopus</i><br><i>SITDMO</i><br><i>Sitodiplosis mosellana</i><br>-All growth stages | ME          | 50 g/L                | Spraying          | BBCH 51-83                  | 1-2                | 7 days                              | 2.5 – 10                 | 100 – 400          | 10             | 28          |                                                 |
| Oilseed rape winter                           | North-/Central-/South-EU | FASTAC ME (BAS 310 55 I) | F         | <i>CEUTNA</i><br><i>Ceutorhynchus napi</i><br><i>CEUTAS</i><br><i>Ceutorhynchus assimilis</i><br><i>MELIAE</i><br><i>Meligethes aeneus</i><br>-Adults-                                                                                                                                   | ME          | 50 g/L                | Spraying          | BBCH 51-59                  | 1-2                | 7 days                              | 2.5 – 10                 | 100 – 400          | 10             | 28          |                                                 |
| Lettuces                                      | North-/Central-EU        | FASTAC ME (BAS 310 55 I) | F         | <i>NASORN</i><br><i>Nasonovia ribisnigri</i><br><i>APHISP</i><br>Other aphids<br>-All growth stages-                                                                                                                                                                                     | ME          | 50 g/L                | Spraying          | BBCH 10-49                  | 1-2                | 7 days                              | 1 – 5                    | 200 – 1000         | 10             | 3           |                                                 |
| Lettuces                                      | South-EU                 | FASTAC ME (BAS 310 55 I) | F         | <i>NASORN</i><br><i>Nasonovia ribisnigri</i><br><i>APHISP</i><br>Other aphids<br>-All growth stages-                                                                                                                                                                                     | ME          | 50 g/L                | Spraying          | BBCH 10-49                  | a) 1<br>b) 2       | a) n.a.<br>b) 7 days                | a) 2 – 10<br>b) 1 – 5    | 200 – 1000         | a) 20<br>b) 10 | 3           | Max. total seasonal rate per crop: 20 g a.s./ha |

|                     |                   |                          |   |                                                                                                                                                        |    |        |          |            |              |                      |                         |            |                |   |                                                                          |
|---------------------|-------------------|--------------------------|---|--------------------------------------------------------------------------------------------------------------------------------------------------------|----|--------|----------|------------|--------------|----------------------|-------------------------|------------|----------------|---|--------------------------------------------------------------------------|
| Leafy brassica      | North-/Central-EU | FASTAC ME (BAS 310 55 I) | F | <i>BRVCBR Brevicoryne brassicae</i><br>-All growth stages-<br><i>PIERSP Pieris sp</i><br><i>PLUTMA Plutella maculipennis</i><br>-Larval stages-        | ME | 50 g/L | Spraying | BBCH 10-49 | 1-2          | 7 days               | 1 – 5                   | 200 – 1000 | 10             | 3 |                                                                          |
| Leafy brassica      | South-EU          | FASTAC ME (BAS 310 55 I) | F | <i>BRVCBR Brevicoryne brassicae</i><br>-All growth stages-<br><i>PIERSP Pieris sp</i><br><i>PLUTMA Plutella maculipennis</i><br>-Larval stages-        | ME | 50 g/L | Spraying | BBCH 10-49 | a) 1<br>b) 2 | a) n.a.<br>b) 7 days | a) 2 – 10<br>b) 1 – 5   | 200 – 1000 | a) 20<br>b) 10 | 3 | Max. total seasonal rate per crop: 20 g a.s./ha                          |
| Cucumber, Courgette | North-/Central-EU | FASTAC ME (BAS 310 55 I) | G | <i>APHIGO Aphis gossypii</i><br><i>MYZUPE Myzus persicae</i><br><i>TRIAVA Trialeurodes vap.</i><br><i>BEMITA Bemisia tabaci</i><br>-All growth stages- | ME | 50 g/L | Spraying | BBCH 10-89 | 1            | n.a.                 | 2 – 15                  | 200 – 1500 | 30             | 3 | Permanent glasshouses                                                    |
| Cucumber, Courgette | South-EU          | FASTAC ME (BAS 310 55 I) | G | <i>APHIGO Aphis gossypii</i><br><i>MYZUPE Myzus persicae</i><br><i>TRIAVA Trialeurodes vap.</i><br><i>BEMITA Bemisia tabaci</i><br>-All growth stages- | ME | 50 g/L | Spraying | BBCH 10-89 | a) 1<br>b) 2 | a) n.a.<br>b) 7 days | a) 2 – 15<br>b) 1 – 7.5 | 200 – 1500 | a) 30<br>b) 15 | 3 | Permanent glasshouses<br>Max. total seasonal rate per crop: 30 g a.s./ha |

- \* For uses where the column „Remarks“ is marked in grey further consideration is necessary. Uses should be crossed out when the notifier no longer supports this use(s).
- (a) For crops, the EU and Codex classification (both) should be taken into account ; where relevant, the use situation should be described (e.g. fumigation of a structure)
- (b) Outdoor or field use (F), greenhouse application (G) or indoor application (I)
- (c) e.g. biting and suckling insects, soil born insects, foliar fungi, weeds
- (d) e.g. wettable powder (WP), emulsifiable concentrate (EC), granule (GR)
- (e) GCPF Codes – GIFAP Technical Monograph N° 2, 1989
- (f) All abbreviations used must be explained
- (g) Method, e.g. high volume spraying, low volume spraying, spreading, dusting, drench
- (h) Kind, e.g. overall, broadcast, aerial spraying, row, individual plant, between the plant – type of equipment used must be indicated

- (i) g/kg or g/L. Normally the rate should be given for the active substance (according to ISO) and not for the variant in order to compare the rate for same active substances used in different variants (e.g. fluoroxypyr). In certain cases, where only one variant synthesised, it is more appropriate to give the rate for the variant (e.g. benthialvalicarb-isopropyl).
- (j) Growth stage at last treatment (BBCH Monograph, Growth Stages of Plants, 1997, Blackwell, ISBN 3-8263-3152-4), including where relevant, information on season at time of application
- (k) Indicate the minimum and maximum number of application possible under practical conditions of use
- (l) The values should be given in g or kg whatever gives the more manageable number (e.g. 200 kg/ha instead of 200 000 g/ha or 12.5 g/ha instead of 0.0125 kg/ha)
- (m) PHI - minimum pre-harvest interval

**Summary of additional intended uses for which MRL applications have been made, that in addition to the uses above, have also been considered in the consumer risk assessment (name of active substance or the respective variant)**

**Regulation (EC) N° 1107/2009 Article 8.1(g)**

**Important note: efficacy, environmental risk and risk to humans by exposure other than via their diet have not been assessed for these uses**

| Crop and/or situation<br>(a)                                                         | Member State or Country | Product name | F G or I<br>(b) | Pests or Group of pests controlled<br>(c) | Preparation |                   | Application       |                                        |                       |                                       | Application rate per treatment |                    |                           | PHI (days)<br>(m) | Remarks |
|--------------------------------------------------------------------------------------|-------------------------|--------------|-----------------|-------------------------------------------|-------------|-------------------|-------------------|----------------------------------------|-----------------------|---------------------------------------|--------------------------------|--------------------|---------------------------|-------------------|---------|
|                                                                                      |                         |              |                 |                                           | Type (d-f)  | Conc. a.s.<br>(i) | method kind (f-h) | range of growth stages & season<br>(j) | number min-max<br>(k) | Interval between application<br>(min) | kg a.s./hL min-max<br>(l)      | Water L/ha min-max | kg a.s./ha min-max<br>(l) |                   |         |
| <b>MRL Application</b> (according to Article 8.1(g) of Regulation (EC) No 1107/2009) |                         |              |                 |                                           |             |                   |                   |                                        |                       |                                       |                                |                    |                           |                   |         |
|                                                                                      |                         |              |                 |                                           |             |                   |                   |                                        |                       |                                       |                                |                    |                           |                   |         |
|                                                                                      |                         |              |                 |                                           |             |                   |                   |                                        |                       |                                       |                                |                    |                           |                   |         |
|                                                                                      |                         |              |                 |                                           |             |                   |                   |                                        |                       |                                       |                                |                    |                           |                   |         |
|                                                                                      |                         |              |                 |                                           |             |                   |                   |                                        |                       |                                       |                                |                    |                           |                   |         |
|                                                                                      |                         |              |                 |                                           |             |                   |                   |                                        |                       |                                       |                                |                    |                           |                   |         |

- |                                                                                                                                                                                                                                                                                                                                                                                                                                                                                                                                                                                                                                                                                                                                                                                                                                                                                                                              |                                                                                                                                                                                                                                                                                                                                                                                                                                                                                                                                                                                                                                                                                                                                                                                                                                                                                                                                                                                                         |
|------------------------------------------------------------------------------------------------------------------------------------------------------------------------------------------------------------------------------------------------------------------------------------------------------------------------------------------------------------------------------------------------------------------------------------------------------------------------------------------------------------------------------------------------------------------------------------------------------------------------------------------------------------------------------------------------------------------------------------------------------------------------------------------------------------------------------------------------------------------------------------------------------------------------------|---------------------------------------------------------------------------------------------------------------------------------------------------------------------------------------------------------------------------------------------------------------------------------------------------------------------------------------------------------------------------------------------------------------------------------------------------------------------------------------------------------------------------------------------------------------------------------------------------------------------------------------------------------------------------------------------------------------------------------------------------------------------------------------------------------------------------------------------------------------------------------------------------------------------------------------------------------------------------------------------------------|
| <ul style="list-style-type: none"> <li>(a) For crops, the EU and Codex classifications (both) should be taken into account; where relevant, the use situation should be described (e.g. fumigation of a structure)</li> <li>(b) Outdoor or field use (F), greenhouse application (G) or indoor application (I)</li> <li>(c) e.g. biting and sucking insects, soil born insects, foliar fungi, weeds</li> <li>(d) e.g. wettable powder (WP), emulsifiable concentrate (EC), granule (GR)</li> <li>(e) CropLife International Technical Monograph no 2, 6th Edition. Revised May 2008. Catalogue of pesticide</li> <li>(f) All abbreviations used must be explained</li> <li>(g) Method, e.g. high volume spraying, low volume spraying, spreading, dusting, drench</li> <li>(h) Kind, e.g. overall, broadcast, aerial spraying, row, individual plant, between the plant- type of equipment used must be indicated</li> </ul> | <ul style="list-style-type: none"> <li>(i) g/kg or g/L. Normally the rate should be given for the active substance (according to ISO) and not for the variant in order to compare the rate for same active substances used in different variants (e.g. fluoroxypyr). <b>In certain cases, where only one variant is synthesised, it is more appropriate to give the rate for the variant (e.g. benthialdicarb-isopropyl).</b></li> <li>(j) Growth stage range from first to last treatment (BBCH Monograph, Growth Stages of Plants, 1997, Blackwell, ISBN 3-8263-3152-4), including where relevant, information on season at time of application</li> <li>(k) Indicate the minimum and maximum number of applications possible under practical conditions of use</li> <li>(l) The values should be given in g or kg whatever gives the more manageable number (e.g. 200 kg/ha instead of 200 000 g/ha or 12.5 g/ha instead of 0.0125 kg/ha)</li> <li>(m) PHI - minimum pre-harvest interval</li> </ul> |
|------------------------------------------------------------------------------------------------------------------------------------------------------------------------------------------------------------------------------------------------------------------------------------------------------------------------------------------------------------------------------------------------------------------------------------------------------------------------------------------------------------------------------------------------------------------------------------------------------------------------------------------------------------------------------------------------------------------------------------------------------------------------------------------------------------------------------------------------------------------------------------------------------------------------------|---------------------------------------------------------------------------------------------------------------------------------------------------------------------------------------------------------------------------------------------------------------------------------------------------------------------------------------------------------------------------------------------------------------------------------------------------------------------------------------------------------------------------------------------------------------------------------------------------------------------------------------------------------------------------------------------------------------------------------------------------------------------------------------------------------------------------------------------------------------------------------------------------------------------------------------------------------------------------------------------------------|

## Further information, Efficacy

### Effectiveness (Regulation (EU) N° 284/2013, Annex Part A, point 6.2)

Alpha-cypermethrin exhibits high levels of efficacy on a broad range of crop-relevant noxious insects. Alpha-cypermethrin, contained in the crop protection product BAS 310 55 I, has been registered in many EU countries with different formulations based on detailed national assessments of the efficacy package in compliance with Regulation (EC) No 545/2011 and according to the Uniform Principles (Regulation (EC) No 546/2011), with which Member States authorities were satisfied.

To support the representative crop uses, BAS 310 55 I was tested in 231 trials across Europe in the EPPO-zones Maritime, Mediterranean, North East (N.E.) and South East (S.E.) at the dose rates of 0,2 l/ha and 0,4 l/ha or 0,6 l/ha respectively under various agronomical conditions (application systems, soil types, temperature, rainfall). However, a full assessment of the trials needs to be done in the framework of the registration of the formulations (MS level).

### Adverse effects on field crops (Regulation (EU) N° 284/2013, Annex Part A, point 6.4)

Alpha-cypermethrin has been applied since many years with several different formulations and different dose rates across a wide range of crops without any reports of a phytotoxic effect on treated or succeeding crops. Due to the broad range of crops in which the product has been used, most rotational crop possibilities have been appeared in practice. Therefore no negative impact on treated or succeeding crops is to be expected.

A more detailed assessment should be performed for products authorization applications.

### Observations on other undesirable or unintended side-effects (Regulation (EU) N° 284/2013, Annex Part A, point 6.5)

Due to the broad range of crops in which the product has been used, most rotational crop possibilities have appeared in practice. Therefore no negative impact on adjacent or succeeding crops is to be expected.

A more detailed assessment should be performed for products authorization applications.

### Groundwater metabolites: Screening for biological activity (SANCO/221/2000-rev.10-final Step 3 a Stage 1)

Activity against target organism none

Assessment not triggered since there are no relevant metabolisms in groundwater for alpha-cypermethrin

## Methods of Analysis

### Analytical methods for the active substance (Regulation (EU) N° 283/2013, Annex Part A, point 4.1 and Regulation (EU) N° 284/2013, Annex Part A, point 5.2)

|                                                     |                           |
|-----------------------------------------------------|---------------------------|
| Technical a.s. (analytical technique)               | GC-FID (CIPAC Method 454) |
| Impurities in technical a.s. (analytical technique) | HPLC-UV and GC-FID        |
| Plant protection product (analytical technique)     | GC-FID                    |

### Analytical methods for residues (Regulation (EU) N° 283/2013, Annex Part A, point 4.2 & point 7.4.2)

#### Residue definitions for monitoring purposes

|                         |                                                                               |
|-------------------------|-------------------------------------------------------------------------------|
| Food of plant origin    | Cypermethrin including other mixtures of constituent isomers (sum of isomers) |
| Food of animal origin   | Cypermethrin including other mixtures of constituent isomers (sum of isomers) |
| Soil                    | Alpha-cypermethrin                                                            |
| Sediment                | Alpha-cypermethrin                                                            |
| Water surface           | Alpha-cypermethrin                                                            |
| drinking/ground         | Alpha-cypermethrin                                                            |
| Air                     | Alpha-cypermethrin                                                            |
| Body fluids and tissues | Alpha-cypermethrin, 4-OH-PBA sulfate, DCVA glucuronide                        |

#### Monitoring/Enforcement methods

|                                                                                               |                                                                                                                                                                                                                                                                                      |
|-----------------------------------------------------------------------------------------------|--------------------------------------------------------------------------------------------------------------------------------------------------------------------------------------------------------------------------------------------------------------------------------------|
| Food/feed of plant origin (analytical technique and LOQ for methods for monitoring purposes)  | LC-MS/MS: LOQ of 0.01 mg/kg (target) for each isomer corresponding to 0.01 mg/kg for Cis-I and Trans-III, 0.00695 mg/kg for alpha-cypermethrin (Cis-II) and 0.00429 mg/kg for Trans IV (high water, high acid, dry [high starch and high protein], oily)<br>Independently validated. |
| Food/feed of animal origin (analytical technique and LOQ for methods for monitoring purposes) | LC-MS/MS: LOQ of 0.01 mg/kg (target) for each isomer corresponding to 0.00695 mg/kg for alpha-cypermethrin (muscle, liver, kidney, milk, fat egg), 0.00429 mg/kg (for Trans-IV)<br>Independently validated.                                                                          |
| Soil (analytical technique and LOQ)                                                           | LC-MS/MS: LOQ of 0.001 mg/kg for each isomer                                                                                                                                                                                                                                         |
| Water (analytical technique and LOQ)                                                          | LC-MS/MS: LOQ of 0.75 ng/L (target) corresponding to 0.825 ng/L for alpha-cypermethrin in surface and drinking water.<br>Independently validated for surface and drinking water.                                                                                                     |
| Air (analytical technique and LOQ)                                                            | GC-MS: LOQ of 0.06 µg/m <sup>3</sup> (alpha-cypermethrin)                                                                                                                                                                                                                            |
| Body fluids and tissues (analytical technique and LOQ)                                        | LC-MS/MS: LOQ of 0.035 mg/L (alpha-cypermethrin)<br>Data gap for 4-OH-PBA sulfate, DCVA glucuronide                                                                                                                                                                                  |



**Classification and labelling with regard to physical and chemical data (Regulation (EU) N° 283/2013, Annex Part A, point 10)**

|                                                                                                                                                                                                |                                                                   |
|------------------------------------------------------------------------------------------------------------------------------------------------------------------------------------------------|-------------------------------------------------------------------|
| Substance                                                                                                                                                                                      | Alpha-cypermethrin                                                |
| Harmonised classification according to Regulation (EC) No 1272/2008 and its Adaptations to Technical Process [Table 3.1 of Annex VI of Regulation (EC) No 1272/2008 as amended] <sup>1</sup> : | No classification with regard to physical and chemical properties |
| Peer review proposal <sup>2</sup> for harmonised classification according to Regulation (EC) No 1272/2008:                                                                                     | /                                                                 |

<sup>1</sup> Regulation (EC) No 1272/2008 of the European Parliament and of the Council of 16 December 2008 on classification, labelling and packaging of substances and mixtures, amending and repealing Directives 67/548/EEC and 1999/45/EC, and amending Regulation (EC) No 1907/2006. OJ L 353, 31.12.2008, 1-1355.

<sup>2</sup> It should be noted that harmonised classification and labelling is formally proposed and decided in accordance with Regulation (EC) No 1272/2008. Proposals for classification made in the context of the evaluation procedure under Regulation (EC) No 1107/2009 are not formal proposals.

## Impact on Human and Animal Health

### Absorption, distribution, metabolism and excretion (toxicokinetics) (Regulation (EU) N° 283/2013, Annex Part A, point 5.1)

|                                                             |                                                                                                                                                                                                                                                                                                                                                                                                                                                                                                                               |
|-------------------------------------------------------------|-------------------------------------------------------------------------------------------------------------------------------------------------------------------------------------------------------------------------------------------------------------------------------------------------------------------------------------------------------------------------------------------------------------------------------------------------------------------------------------------------------------------------------|
| Rate and extent of oral absorption/systemic bioavailability | Based on urinary excretion,<br>- after low dose (LD) (1-2 mg/kg bw): 40%<br>- after high dose (HD) (20 mg/kg bw): 27%                                                                                                                                                                                                                                                                                                                                                                                                         |
| Toxicokinetics                                              | <p><b>Blood:</b> (LD/HD: 2 / 20 mg/kg bw)</p> <p><b>C<sub>max</sub> :</b> LD: 1.3-1.5 mg/kg bw<br/>HD: 6.7-7.5 mg/kg bw</p> <p><b>T<sub>max</sub>:</b> LD: 6-7 mg/kg bw<br/>HD: 6-9 mg/kg bw</p> <p><b>T<sup>1/2</sup>:</b> LD: 2.8-4.4 h</p> <p><b>Fat:</b> T<sup>1/2</sup> (LD):<br/>2.5-2.7h (initial phase d1-8)<br/>17-26h (final phase d14-42)</p>                                                                                                                                                                      |
| Distribution                                                | In well perfused organs and fatty tissue                                                                                                                                                                                                                                                                                                                                                                                                                                                                                      |
| Potential for bioaccumulation                               | Higher amounts retained in skin and fat (up to 0.6% after 7 days) but no significant potential for bioaccumulation.                                                                                                                                                                                                                                                                                                                                                                                                           |
| Rate and extent of excretion                                | <p>LD (2 mg/kg bw): 43-46% in urine*; 30-35% in faeces (*within 24h)</p> <p>HD (20 mg/kg bw): 27% in urine*; 24-28% in faeces (*within 96h)</p>                                                                                                                                                                                                                                                                                                                                                                               |
| Metabolism in animals                                       | <p>Moderately metabolised (~25% identified); main metabolites in urine (~16-17%): 4-OH-PBA sulfate and DCVA glucuronide</p> <p>α-cypermethrin excreted unchanged in faeces: 39-57%</p> <p>Hydrolytic cleavage of the ester bound and excretion of the cis cyclopropanecarboxylic acid moiety in free and conjugated form in urine. Minimal hydroxylation at the methyl groups attached to the cyclopropane- ring.</p> <p>Hydroxylation of the phenoxy-ring and cleavage of the ether bridge with loss of the phenyl ring.</p> |
| <i>In vitro</i> metabolism                                  | Hepatic microsome metabolism: oxidation predominant in rat, and hydrolysis predominant in human .                                                                                                                                                                                                                                                                                                                                                                                                                             |
| Toxicologically relevant compounds (animals and plants)     | Alpha-cypermethrin                                                                                                                                                                                                                                                                                                                                                                                                                                                                                                            |
| Toxicologically relevant compounds (environment)            | Alpha-cypermethrin                                                                                                                                                                                                                                                                                                                                                                                                                                                                                                            |

### Acute toxicity (Regulation (EU) N° 283/2013, Annex Part A, point 5.2)

|                             |                 |             |
|-----------------------------|-----------------|-------------|
| Rat LD <sub>50</sub> oral   | 40-80 mg/kg bw  | <b>H301</b> |
| Rat LD <sub>50</sub> dermal | > 2000 mg/kg bw |             |

|                                 |                              |                            |
|---------------------------------|------------------------------|----------------------------|
| Rat LC <sub>50</sub> inhalation | 1.33mg/L air /4h (nose-only) | <b>H332</b><br><b>H335</b> |
| Skin irritation                 | Non-irritant                 | -                          |
| Eye irritation                  | Non-irritant                 | -                          |
| Skin sensitisation              | Not sensitising (GPMT)       | -                          |
| Phototoxicity                   | No phototoxicity             | -                          |

### Short-term toxicity (Regulation (EU) N° 283/2013, Annex Part A, point 5.3)

|                                |                                                                                                                 |                                |
|--------------------------------|-----------------------------------------------------------------------------------------------------------------|--------------------------------|
| Target organ / critical effect | Neurotoxicity (rat, mouse, dog)<br>Liver (rat, mouse)                                                           |                                |
| Relevant oral NOAEL            | 2 mg/kg bw per day (dog, 1-year)<br>13.1 mg/kg bw per day (rat, 90-day)<br>6.3 mg/kg bw per day (mouse, 90-day) | <b>STOT-RE1</b><br><b>H372</b> |
| Relevant dermal NOAEL          | 2000 mg/kg bw per day (rabbit, 28-day)                                                                          | -                              |
| Relevant inhalation NOAEL      | LOAEL 0.029 mg/L based on local adverse effects (rat, 14-day, complementary study)                              | -                              |

### Genotoxicity (Regulation (EU) N° 283/2013, Annex Part A, point 5.4)

|                            |                                                                                                                                                                                                                                                      |  |
|----------------------------|------------------------------------------------------------------------------------------------------------------------------------------------------------------------------------------------------------------------------------------------------|--|
| <i>In vitro</i> studies    | Ames test : Salmonella strains TA 98, TA 100, TA 1535, TA 1537 and TA 1538 ±S9 : Negative.<br>L5178Y Mouse lymphoma cells: Negative.<br>Chromosome aberrations in human lymphocytes ±S9: Negative                                                    |  |
| <i>In vivo</i> studies     | Micronucleus assay in mice (oral exposure): Negative.<br>Chromosome aberrations in rat bone marrow (oral exposure): Equivocal.<br>UDS <i>in vivo</i> after partial hepatectomy (oral exposure): Negative.<br>Dominant lethal test in mice: Negative. |  |
| Photomutagenicity          | No data - Not required                                                                                                                                                                                                                               |  |
| Potential for genotoxicity | Alpha-cypermethrin is unlikely to be genotoxic                                                                                                                                                                                                       |  |

### Long-term toxicity and carcinogenicity (Regulation (EU) N°283/2013, Annex Part A, point 5.5)

|                                                  |                                                                             |   |
|--------------------------------------------------|-----------------------------------------------------------------------------|---|
| Long-term effects (target organ/critical effect) | Rat: ↑urea levels and kidney weight<br>Mouse: clinical signs, decreased BWG | - |
|--------------------------------------------------|-----------------------------------------------------------------------------|---|

|                                             |                                                                                                                     |   |
|---------------------------------------------|---------------------------------------------------------------------------------------------------------------------|---|
| Relevant long-term NOAEL                    | 0.5 mg/kg bw per day (rat, 2-year, cypermethrin)<br>3 mg/kg bw per day (mouse, 18-month)                            | - |
| Carcinogenicity (target organ, tumour type) | No treatment-related tumours (rat, mouse)<br>Alpha-cypermethrin is unlikely to pose a carcinogenic hazard to humans | - |
| Relevant NOAEL for carcinogenicity          | 50 mg/kg bw per day (rat, 2-year, high dose)<br>35 mg/kg bw per day (mouse, 18-month, high dose)                    |   |

### Reproductive toxicity (Regulation (EU) N° 283/2013, Annex Part A, point 5.6)

#### Reproduction toxicity

|                                       |                                                                                                                                                                                            |   |
|---------------------------------------|--------------------------------------------------------------------------------------------------------------------------------------------------------------------------------------------|---|
| Reproduction target / critical effect | <u>Rat multigeneration study</u> (cypermethrin):<br>Parental toxicity: ↓body weight, ↓food intake<br>Offspring's toxicity: ↓litter weight<br>Reproductive toxicity: ↓pup survival at birth | - |
| Relevant parental NOAEL               | 10 mg/kg bw per day                                                                                                                                                                        | - |
| Relevant reproductive NOAEL           | 10 mg/kg bw per day                                                                                                                                                                        | - |
| Relevant offspring NOAEL              | 10 mg/kg bw per day                                                                                                                                                                        | - |

#### Developmental toxicity

|                                        |                                                                                                                                                                                                                                                    |   |
|----------------------------------------|----------------------------------------------------------------------------------------------------------------------------------------------------------------------------------------------------------------------------------------------------|---|
| Developmental target / critical effect | <u>Rat:</u><br><b>Maternal toxicity:</b> ↑clinical signs, ↓body weight gain, ↓food intake<br><b>Developmental toxicity:</b> ↓body weight<br><u>Rabbit:</u><br><b>Maternal toxicity:</b> ↓bw gain, ↓food intake<br><b>Developmental toxicity:</b> - | - |
| Relevant maternal NOAEL                | <u>Rat:</u> 3 mg/kg bw per day<br><u>Rabbit:</u> 15 mg/kg bw per day                                                                                                                                                                               | - |
| Relevant developmental NOAEL           | <u>Rat:</u> 9 mg/kg bw per day<br><u>Rabbit:</u> 30 mg/kg bw per day                                                                                                                                                                               | - |

### Neurotoxicity (Regulation (EU) N° 283/2013, Annex Part A, point 5.7)

|                             |                                                                                                                                               |  |
|-----------------------------|-----------------------------------------------------------------------------------------------------------------------------------------------|--|
| Acute neurotoxicity, rat    | NOAEL= 4 mg/kg bw based on clinical signs                                                                                                     |  |
| Repeated neurotoxicity, rat | 4-week NOAEL= 10 mg/kg bw per day, based on increased beta-galactosidase activity in nerves.<br>90-day NOAEL = 36 mg/kg bw per day (top dose) |  |
| Additional studies:         | Maternal NOAEL = 2 mg/kg bw per day,                                                                                                          |  |

**Developmental neurotoxicity, rat**

|                                                                                                                                    |  |
|------------------------------------------------------------------------------------------------------------------------------------|--|
| based on decreased BWG at the end of gestation<br>Neurodevelopmental NOAEL < 0.25 mg/kg bw per day based on clinical signs in pups |  |
|------------------------------------------------------------------------------------------------------------------------------------|--|

**Other toxicological studies (Regulation (EU) N° 283/2013, Annex Part A, point 5.8)**

Supplementary studies on the active substance:

Immunotoxicity study, 28d rat

|                                                    |
|----------------------------------------------------|
| Systemic and immunotoxic NOAEL > 34 mg/kg bw per d |
|----------------------------------------------------|

Endocrine disrupting properties

Intact male rat study, 15d

|                                                                                                                                                                                                       |
|-------------------------------------------------------------------------------------------------------------------------------------------------------------------------------------------------------|
| NOAEL = 3.5 mg/kg bw per day<br>LOAEL = 6.6 mg/kg b.w./d, based upon a weakly ↓b.w. gain, prostate weight, very weak ↓in Cauda epididymis and seminal vesicles weight, and subtle total sperm counts. |
|-------------------------------------------------------------------------------------------------------------------------------------------------------------------------------------------------------|

Studies performed on metabolites or impurities

|                                                                                                                                             |
|---------------------------------------------------------------------------------------------------------------------------------------------|
| Group of hydroxylated derivatives of alpha-cypermethrin and their conjugates: unlikely to be genotoxic or to be more toxic than the parent. |
|---------------------------------------------------------------------------------------------------------------------------------------------|

|                                                                                                                                                                                                                                                             |
|-------------------------------------------------------------------------------------------------------------------------------------------------------------------------------------------------------------------------------------------------------------|
| Group of PBA and derivatives (4-OH-PBA, 4-OH-PBA sulfate, 3-PBA, 3-PBAldehyde): they could be initially considered unlikely to be of higher toxicity than the parent. Data gap for further studies submitted under confirmatory data on lambda-cyhalothrin. |
|-------------------------------------------------------------------------------------------------------------------------------------------------------------------------------------------------------------------------------------------------------------|

**Medical data (Regulation (EU) N° 283/2013, Annex Part A, point 5.9)**

|                                                             |
|-------------------------------------------------------------|
| No detrimental effects on health in manufacturing personnel |
|-------------------------------------------------------------|

**Summary<sup>3</sup> (Regulation (EU) N°1107/2009, Annex II, point 3.1 and 3.6)**

|                                                  | Value<br>(mg/kg bw (per day)) | Study    | Uncertainty factor |
|--------------------------------------------------|-------------------------------|----------|--------------------|
| Acceptable Daily Intake (ADI)                    | 0.00125                       | DNT, rat | 200                |
| Acute Reference Dose (ARfD)                      | 0.00125                       | DNT, rat | 200                |
| Acceptable Operator Exposure Level (AOEL)        | 0.0005                        | DNT, rat | 200<br>40%*        |
| Acute Acceptable Operator Exposure Level (AAOEL) | 0.0005                        | DNT, rat | 200<br>40%*        |

\*: 40% oral absorption value

**Dermal absorption (Regulation (EU) N° 284/2013, Annex Part A, point 7.3)**Representative formulation (*indicate name, type e.g. EC and concentration of active substance*)

|                                          |
|------------------------------------------|
| Concentrate: 3 %<br>Spray dilution:0.7 % |
|------------------------------------------|

<sup>3</sup> If available include also reference values for metabolites

## Exposure scenarios (Regulation (EU) N° 284/2013, Annex Part A, point 7.2)

|                          |                                                                                                                                                                                                                                                                                                                                                                                                                                                                                                                                                                                                                                                                                                |                  |     |                     |     |                 |     |                    |     |                 |     |                    |    |
|--------------------------|------------------------------------------------------------------------------------------------------------------------------------------------------------------------------------------------------------------------------------------------------------------------------------------------------------------------------------------------------------------------------------------------------------------------------------------------------------------------------------------------------------------------------------------------------------------------------------------------------------------------------------------------------------------------------------------------|------------------|-----|---------------------|-----|-----------------|-----|--------------------|-----|-----------------|-----|--------------------|----|
| Operators                | <p><b>Use:</b></p> <p><b>(i) Lettuces and leafy cabbages (field) 20g/ha, 1000L/ha, Tractor mounted boom sprayers, 1 application</b></p> <p><b>Exposure estimates (model): % of AOEL</b></p> <p>German model:</p> <table data-bbox="767 533 1377 607"> <tr> <td>Without PPE:</td> <td>100</td> </tr> <tr> <td>With PPE (gloves):</td> <td>16</td> </tr> </table> <p>UK POEM model</p> <table data-bbox="767 651 1377 725"> <tr> <td>Without PPE:</td> <td>232</td> </tr> <tr> <td>With PPE (gloves):</td> <td>28</td> </tr> </table> <p>AOEM</p> <table data-bbox="767 770 1377 844"> <tr> <td>Without PPE:</td> <td>871</td> </tr> <tr> <td>With PPE (gloves):</td> <td>79</td> </tr> </table> | Without PPE:     | 100 | With PPE (gloves):  | 16  | Without PPE:    | 232 | With PPE (gloves): | 28  | Without PPE:    | 871 | With PPE (gloves): | 79 |
| Without PPE:             | 100                                                                                                                                                                                                                                                                                                                                                                                                                                                                                                                                                                                                                                                                                            |                  |     |                     |     |                 |     |                    |     |                 |     |                    |    |
| With PPE (gloves):       | 16                                                                                                                                                                                                                                                                                                                                                                                                                                                                                                                                                                                                                                                                                             |                  |     |                     |     |                 |     |                    |     |                 |     |                    |    |
| Without PPE:             | 232                                                                                                                                                                                                                                                                                                                                                                                                                                                                                                                                                                                                                                                                                            |                  |     |                     |     |                 |     |                    |     |                 |     |                    |    |
| With PPE (gloves):       | 28                                                                                                                                                                                                                                                                                                                                                                                                                                                                                                                                                                                                                                                                                             |                  |     |                     |     |                 |     |                    |     |                 |     |                    |    |
| Without PPE:             | 871                                                                                                                                                                                                                                                                                                                                                                                                                                                                                                                                                                                                                                                                                            |                  |     |                     |     |                 |     |                    |     |                 |     |                    |    |
| With PPE (gloves):       | 79                                                                                                                                                                                                                                                                                                                                                                                                                                                                                                                                                                                                                                                                                             |                  |     |                     |     |                 |     |                    |     |                 |     |                    |    |
|                          | <p><b>(ii) Cucumbers and courgettes (greenhouse) 30g/ha, 1500L/ha, spray pistol/lance application, 1 application</b></p> <p><u>Greenhouse (S.E-model):</u></p> <table data-bbox="767 1003 1377 1077"> <tr> <td>Without PPE:</td> <td>100</td> </tr> <tr> <td>PPE (gloves):</td> <td>79</td> </tr> </table>                                                                                                                                                                                                                                                                                                                                                                                     | Without PPE:     | 100 | PPE (gloves):       | 79  |                 |     |                    |     |                 |     |                    |    |
| Without PPE:             | 100                                                                                                                                                                                                                                                                                                                                                                                                                                                                                                                                                                                                                                                                                            |                  |     |                     |     |                 |     |                    |     |                 |     |                    |    |
| PPE (gloves):            | 79                                                                                                                                                                                                                                                                                                                                                                                                                                                                                                                                                                                                                                                                                             |                  |     |                     |     |                 |     |                    |     |                 |     |                    |    |
| Workers                  | <p><u>Europoem</u></p> <table data-bbox="767 1133 1377 1207"> <tr> <td>Without PPE:</td> <td>60</td> </tr> <tr> <td>PPE (gloves):</td> <td>14</td> </tr> </table>                                                                                                                                                                                                                                                                                                                                                                                                                                                                                                                              | Without PPE:     | 60  | PPE (gloves):       | 14  |                 |     |                    |     |                 |     |                    |    |
| Without PPE:             | 60                                                                                                                                                                                                                                                                                                                                                                                                                                                                                                                                                                                                                                                                                             |                  |     |                     |     |                 |     |                    |     |                 |     |                    |    |
| PPE (gloves):            | 14                                                                                                                                                                                                                                                                                                                                                                                                                                                                                                                                                                                                                                                                                             |                  |     |                     |     |                 |     |                    |     |                 |     |                    |    |
| Bystanders and residents | <p><u>German model</u></p> <table data-bbox="767 1263 1377 1337"> <tr> <td>Adult bystanders</td> <td>1.9</td> </tr> <tr> <td>Children bystanders</td> <td>1.5</td> </tr> </table> <p>Adult residents 0.13</p> <p>Children resident 0.86</p> <p><u>EFSA model</u></p> <table data-bbox="767 1503 1377 1576"> <tr> <td>Adult residents</td> <td>56</td> </tr> <tr> <td>Children resident</td> <td>233</td> </tr> </table> <p><u>EFSA model + refinement*</u></p> <table data-bbox="767 1621 1377 1695"> <tr> <td>Adult residents</td> <td>12</td> </tr> <tr> <td>Children resident</td> <td>24</td> </tr> </table>                                                                               | Adult bystanders | 1.9 | Children bystanders | 1.5 | Adult residents | 56  | Children resident  | 233 | Adult residents | 12  | Children resident  | 24 |
| Adult bystanders         | 1.9                                                                                                                                                                                                                                                                                                                                                                                                                                                                                                                                                                                                                                                                                            |                  |     |                     |     |                 |     |                    |     |                 |     |                    |    |
| Children bystanders      | 1.5                                                                                                                                                                                                                                                                                                                                                                                                                                                                                                                                                                                                                                                                                            |                  |     |                     |     |                 |     |                    |     |                 |     |                    |    |
| Adult residents          | 56                                                                                                                                                                                                                                                                                                                                                                                                                                                                                                                                                                                                                                                                                             |                  |     |                     |     |                 |     |                    |     |                 |     |                    |    |
| Children resident        | 233                                                                                                                                                                                                                                                                                                                                                                                                                                                                                                                                                                                                                                                                                            |                  |     |                     |     |                 |     |                    |     |                 |     |                    |    |
| Adult residents          | 12                                                                                                                                                                                                                                                                                                                                                                                                                                                                                                                                                                                                                                                                                             |                  |     |                     |     |                 |     |                    |     |                 |     |                    |    |
| Children resident        | 24                                                                                                                                                                                                                                                                                                                                                                                                                                                                                                                                                                                                                                                                                             |                  |     |                     |     |                 |     |                    |     |                 |     |                    |    |
|                          | <p>*: using data from air measurements</p>                                                                                                                                                                                                                                                                                                                                                                                                                                                                                                                                                                                                                                                     |                  |     |                     |     |                 |     |                    |     |                 |     |                    |    |

### Classification with regard to toxicological data (Regulation (EU) N° 283/2013, Annex Part A, Section 10)

Substance :

Harmonised classification according to Regulation (EC) No 1272/2008 and its Adaptations to Technical Process [Table 3.1 of Annex VI of Regulation (EC) No 1272/2008 as amended]<sup>4</sup> :

Peer review proposal<sup>5</sup> for harmonised classification according to Regulation (EC) No 1272/2008:

|                                                                                                                                                                                |
|--------------------------------------------------------------------------------------------------------------------------------------------------------------------------------|
| Alpha-cypermethrin                                                                                                                                                             |
| Acute Tox 3; H301 Toxic if swallowed<br>STOT SE 3; H335 May cause respiratory irritation<br>STOT RE 2; H373; May cause damage to organs through prolonged or repeated exposure |
| In addition to the harmonised classification:<br>Acute Tox 4; H332 Harmful if inhaled<br>STOT RE 1 ; H372 “Causes damage to organs through prolonged or repeated exposure”,    |

<sup>4</sup> Regulation (EC) No 1272/2008 of the European Parliament and of the Council of 16 December 2008 on classification, labelling and packaging of substances and mixtures, amending and repealing Directives 67/548/EEC and 1999/45/EC, and amending Regulation (EC) No 1907/2006. OJ L 353, 31.12.2008, 1-1355.

<sup>5</sup> It should be noted that harmonised classification and labelling is formally proposed and decided in accordance with Regulation (EC) No 1272/2008. Proposals for classification made in the context of the evaluation procedure under Regulation (EC) No 1107/2009 are not formal proposals.

## Residues in or on treated products food and feed

## Metabolism in plants (Regulation (EU) N° 283/2013, Annex Part A, points 6.2.1, 6.5.1, 6.6.1 and 6.7.1)

| <b>Primary crops</b><br>(Plant groups covered)<br><b>OECD Guideline 501</b>                                                                                                                                                           | Crop groups                                                                                                                                                                                                                                                                                  | Crop(s)                | Application(s)                                                                                                                                                                                                    | DAT (days)                                                                                                                                         |                            |
|---------------------------------------------------------------------------------------------------------------------------------------------------------------------------------------------------------------------------------------|----------------------------------------------------------------------------------------------------------------------------------------------------------------------------------------------------------------------------------------------------------------------------------------------|------------------------|-------------------------------------------------------------------------------------------------------------------------------------------------------------------------------------------------------------------|----------------------------------------------------------------------------------------------------------------------------------------------------|----------------------------|
|                                                                                                                                                                                                                                       | Fruit crops                                                                                                                                                                                                                                                                                  | Apples <sup>(1)</sup>  | Applied directly (via syringe) to fruits and leaves (application rate not specified);<br><i>cis</i> -cypermethrin [ <sup>14</sup> C-Ph / <sup>14</sup> C-Cy];<br><i>trans</i> -cypermethrin [ <sup>14</sup> C-Ph] | 26 (leaves);<br>22 (apples)                                                                                                                        |                            |
|                                                                                                                                                                                                                                       | Root crops                                                                                                                                                                                                                                                                                   | -                      | -                                                                                                                                                                                                                 | -                                                                                                                                                  |                            |
|                                                                                                                                                                                                                                       | Leafy crops                                                                                                                                                                                                                                                                                  | cabbage <sup>(1)</sup> | 3 x 50 g a.s./ha (7.5N)<br>Alpha-cypermethrin [ <sup>14</sup> C-benzyl];<br><i>Cis</i> -cypermethrin [ <sup>14</sup> C-benzyl]                                                                                    | 43 (at harvest)                                                                                                                                    |                            |
|                                                                                                                                                                                                                                       |                                                                                                                                                                                                                                                                                              | lettuce                | 2 x 50 g a.s./ha (5N)<br>Alpha-cypermethrin [ <sup>14</sup> C-benzyl / <sup>14</sup> C-cyclopropane]                                                                                                              | 3, 7                                                                                                                                               |                            |
|                                                                                                                                                                                                                                       | Cereals/grass crops                                                                                                                                                                                                                                                                          | winter wheat           | 1 x 10 g a.s./ha (0.5N)<br>1 x 100 g a.s./ha (5N)<br>Alpha-cypermethrin [ <sup>14</sup> C-benzyl / <sup>14</sup> C-vinyl]                                                                                         | 57 (at harvest)<br>62 (at harvest)                                                                                                                 |                            |
|                                                                                                                                                                                                                                       |                                                                                                                                                                                                                                                                                              | spring wheat           | 2 x 80 g a.s./ha (8N)<br>Alpha-cypermethrin [ <sup>14</sup> C-benzyl / <sup>14</sup> C-cyclopropane]                                                                                                              | 0, 7 (after 1st appl.);<br>0, 21, 42 (after 2nd appl.)                                                                                             |                            |
|                                                                                                                                                                                                                                       | Pulses/Oilseeds                                                                                                                                                                                                                                                                              | -                      | -                                                                                                                                                                                                                 | -                                                                                                                                                  |                            |
| Miscellaneous                                                                                                                                                                                                                         | -                                                                                                                                                                                                                                                                                            | -                      | -                                                                                                                                                                                                                 |                                                                                                                                                    |                            |
| <sup>14</sup> C-Ph: <sup>14</sup> C-[phenoxybenzyl]; <sup>14</sup> C-Cy: <sup>14</sup> C-cyclopropyl (labelling always tested separately)<br><sup>(1)</sup> No stand-alone fully OECD guideline-compliant study (deficiencies noted). |                                                                                                                                                                                                                                                                                              |                        |                                                                                                                                                                                                                   |                                                                                                                                                    |                            |
| <b>Rotational crops</b><br>(metabolic pattern)<br><b>OECD Guideline 502</b>                                                                                                                                                           | Crop groups                                                                                                                                                                                                                                                                                  | Crop(s)                | PBI (days)                                                                                                                                                                                                        | Comments                                                                                                                                           |                            |
|                                                                                                                                                                                                                                       | Root crops                                                                                                                                                                                                                                                                                   | Sugar beet             | 29, 60, 120                                                                                                                                                                                                       | Bare soil; 1 kg a.s./ha (33N)<br><sup>14</sup> C-benzyl cypermethrin (all crops) and<br><sup>14</sup> C-cyclopropyl cypermethrin (sugar beet only) |                            |
|                                                                                                                                                                                                                                       | Leafy crops                                                                                                                                                                                                                                                                                  | Lettuce                | 29, 60, 120                                                                                                                                                                                                       |                                                                                                                                                    |                            |
|                                                                                                                                                                                                                                       | Cereals (small grain)                                                                                                                                                                                                                                                                        | Wheat                  | 29, 60, 120                                                                                                                                                                                                       |                                                                                                                                                    |                            |
|                                                                                                                                                                                                                                       | Pulses and oilseeds                                                                                                                                                                                                                                                                          | Cotton                 | 29, 60, 120                                                                                                                                                                                                       |                                                                                                                                                    |                            |
| Rotational crop and primary crop metabolism similar?                                                                                                                                                                                  | Metabolites' identification was not attempted in this study. However based on the representative uses and given the 33 fold application rate to bare soil further rotational crop metabolism data can be waived for representative uses, due to insignificant total residues expected at 1N. |                        |                                                                                                                                                                                                                   |                                                                                                                                                    |                            |
| <b>Processed commodities</b><br>(standard hydrolysis study)                                                                                                                                                                           | Conditions                                                                                                                                                                                                                                                                                   | Alpha-cypermethrin     | 3-phenoxy-benzaldehyde                                                                                                                                                                                            | DCVA                                                                                                                                               | <sup>14</sup> C-radiolabel |
|                                                                                                                                                                                                                                       |                                                                                                                                                                                                                                                                                              |                        |                                                                                                                                                                                                                   |                                                                                                                                                    |                            |



## OECD Guideline 507

|                                                                                         |                                                                                                                                                                                                                                                                                                                                                                                                                                                                                                                                                                                                                                                             |            |      |     |                                   |
|-----------------------------------------------------------------------------------------|-------------------------------------------------------------------------------------------------------------------------------------------------------------------------------------------------------------------------------------------------------------------------------------------------------------------------------------------------------------------------------------------------------------------------------------------------------------------------------------------------------------------------------------------------------------------------------------------------------------------------------------------------------------|------------|------|-----|-----------------------------------|
|                                                                                         | 20 min, 90°C, pH 4                                                                                                                                                                                                                                                                                                                                                                                                                                                                                                                                                                                                                                          | 95%        | 2.5% | -   | Benzyl-label                      |
|                                                                                         | 60 min, 100°C, pH 5                                                                                                                                                                                                                                                                                                                                                                                                                                                                                                                                                                                                                                         | 97%        | 2.4% | -   | Benzyl-label                      |
|                                                                                         | 20 min, 120°C, pH 6                                                                                                                                                                                                                                                                                                                                                                                                                                                                                                                                                                                                                                         | 86%<br>66% | 13%  | 23% | Benzyl-label<br>Cyclopropyl-label |
|                                                                                         | Results expressed as mean % of the applied radioactivity                                                                                                                                                                                                                                                                                                                                                                                                                                                                                                                                                                                                    |            |      |     |                                   |
| Residue pattern in processed commodities similar to residue pattern in raw commodities? | Yes (for processed commodities involving pasteurization, boiling, baking and/or brewing);<br>No (for processed commodities involving sterilisation and other processing operations combining high temperature/pH $\geq 6$ ).                                                                                                                                                                                                                                                                                                                                                                                                                                |            |      |     |                                   |
|                                                                                         | Cypermethrin is thermally unstable. There are indications that degradation of cypermethrin is significantly influenced by the food matrix: e.g. significant degradation also observed in tomato paste (pH 4.3-4.5) upon cold storage (12 days at 5°C); Significant degradation observed during canning of peeled tomatoes (Publication from the open literature).<br>Main degradation products: 3-phenoxybenzaldehyde and DCVA<br>The same residue definition as for primary crops is applicable to processed commodities upon finalisation of the assessment of the toxicological relevance of metabolites with the 3-phenoxybenzoyl moiety (3-PBAdehyde). |            |      |     |                                   |
| Plant residue definition for monitoring (RD-Mo)                                         | Cypermethrin including other mixtures of constituent isomers (sum of isomers)                                                                                                                                                                                                                                                                                                                                                                                                                                                                                                                                                                               |            |      |     |                                   |
| OECD Guidance, series on pesticides No 31                                               |                                                                                                                                                                                                                                                                                                                                                                                                                                                                                                                                                                                                                                                             |            |      |     |                                   |
| Plant residue definition for risk assessment (RD-RA)                                    | Cypermethrin including other mixtures of constituent isomers (sum of isomers) <sup>(2)</sup> – <i>Provisional (pending finalisation of the assessment of the genotoxic potential of 3-PBA and review of the preliminary conclusions in toxicology on the whole group of related metabolites bearing the 3-phenoxybenzoyl moiety (besides 3-PBA also e.g. PBAlde, 4-OH-PBA) once the confirmatory data on lambda-cyhalothrin have been peer reviewed).</i>                                                                                                                                                                                                   |            |      |     |                                   |
| Conversion factor (monitoring to risk assessment)                                       | Open (Pending finalisation of residue definition for risk assessment)                                                                                                                                                                                                                                                                                                                                                                                                                                                                                                                                                                                       |            |      |     |                                   |

<sup>(2)</sup> Occurrence data for all cypermethrin isomers to be considered but toxicity of alpha-cypermethrin to be considered.

### Metabolism in livestock (Regulation (EU) N° 283/2013, Annex Part A, points 6.2.2, 6.2.3, 6.2.4, 6.2.5 6.7.1)

| OECD Guideline 503 and SANCO/11187/2013 rev. 3 (fish) | Animal     | Dose (mg/kg bw/d)  | Duration (days) | N rate/comment                                      |
|-------------------------------------------------------|------------|--------------------|-----------------|-----------------------------------------------------|
| Animals covered                                       | Laying hen | Study I: 0.8 and 2 | 14              | 73N and 182N ( <sup>14</sup> C-B/ <sup>14</sup> Cy) |
|                                                       |            | Study II: 0.9      | 14              | 82 N ( <sup>14</sup> C-B/ <sup>14</sup> Cy)         |
|                                                       | Cow        | 0.5                | 4               | 16 N ( <sup>14</sup> C-B)                           |
|                                                       | Goat       | 0.3-0.4            | 7               | Ca. 11 N ( <sup>14</sup> C-B/ <sup>14</sup> Cy)     |
|                                                       | Pig        | -                  | -               | -                                                   |
|                                                       | Fish       | 10 mg/kg feed      | 14              | 175 N ( <sup>14</sup> C-B/ <sup>14</sup> Cy)        |

|                                                                                                      |                                                                                                                                                                                                                                                                                                                                                                                                                                      |
|------------------------------------------------------------------------------------------------------|--------------------------------------------------------------------------------------------------------------------------------------------------------------------------------------------------------------------------------------------------------------------------------------------------------------------------------------------------------------------------------------------------------------------------------------|
|                                                                                                      | <p>Test substance: alpha-cypermethrin<br/> <sup>14</sup>C-B: <sup>14</sup>C-benzyl; <sup>14</sup>C-Cy: <sup>14</sup>C-cyclopropane<br/> The general metabolic pathway in rats and ruminants is comparable.</p>                                                                                                                                                                                                                       |
| Time needed to reach a plateau concentration in milk and eggs (days)                                 | <p>Milk: 1-4 days<br/> Eggs:<br/> 6-8 days (hen metabolism study I);<br/> 12-13 days (hen metabolism study II);<br/> 21-24 days (hen feeding study)</p>                                                                                                                                                                                                                                                                              |
| Animal residue definition for monitoring (RD-Mo)<br><b>OECD Guidance, series on pesticides No 31</b> | Cypermethrin including other mixtures of constituent isomers (sum of isomers)                                                                                                                                                                                                                                                                                                                                                        |
| Animal residue definition for risk assessment (RD-RA)                                                | Cypermethrin including other mixtures of constituent isomers (sum of isomers) <sup>(3)</sup> – <b>Provisional</b> (pending upon assessment of the relative toxicity of the individual cypermethrin isomers, in particular the enantiomer [1R-(1α(S*),3α)], the genotoxic potential of 3-PBA and the review of the preliminary conclusions in toxicology on the whole group of related metabolites with the 3-phenoxybenzoyl moiety). |
| Conversion factor (monitoring to risk assessment)                                                    | Open (Pending finalisation of residue definition for risk assessment)                                                                                                                                                                                                                                                                                                                                                                |
| Metabolism in rat and ruminant similar (Yes/No)                                                      | Yes                                                                                                                                                                                                                                                                                                                                                                                                                                  |
| Fat soluble residues (Yes/No)<br><b>(FAO, 2009)</b>                                                  | Yes (Log P <sub>ow</sub> =5.8 and distribution of residues between fat free muscle and fat in ruminant and poultry metabolism and feeding studies)                                                                                                                                                                                                                                                                                   |

<sup>(3)</sup>: Occurrence data for all cypermethrin isomers to be considered but toxicity of alpha-cypermethrin to be considered.

### Residues in succeeding crops (Regulation (EU) N° 283/2013, Annex Part A, point 6.6.2)

|                                                                                                        |                                                                                                                                                                                                                                                                                                                                                                                                                                                                                                                                                                         |
|--------------------------------------------------------------------------------------------------------|-------------------------------------------------------------------------------------------------------------------------------------------------------------------------------------------------------------------------------------------------------------------------------------------------------------------------------------------------------------------------------------------------------------------------------------------------------------------------------------------------------------------------------------------------------------------------|
| <p><b>Confined rotational crop study</b><br/> (Quantitative aspect)<br/> <b>OECD Guideline 502</b></p> | <p>Confined rotational crop study conducted with wheat, sugar beet, lettuces and cotton planted 29, 60 and 120 days after soil application with (<sup>14</sup>C-benzyl and <sup>14</sup>C-cyclopropyl)-labelled Cypermethrin at a rate of 1 kg a.s./ha (33N) indicated that residue levels in rotational crops will be below 0.01 mg/kg when primary crops are treated at a 1N rate according to the representative uses.</p>                                                                                                                                           |
| <p><b>Field rotational crop study</b><br/> <b>OECD Guideline 504</b></p>                               | <p>1-3 treatments (to bare soil) at rate 20 g a.s./ha (alpha-cypermethrin); plant-back interval of ≤ 19 days on leafy crops (cabbage, lettuce), root crops (carrots), cereals (wheat):</p> <p><i>Cypermethrin isomer pairs cis-I, cis-II, trans-III:</i><br/> each &lt; LOQ (0.01 mg/kg) in all crop parts;</p> <p><i>Cypermethrin isomer pair trans-IV:</i><br/> Root crops (carrot):<br/> &lt; 0.01 mg/kg (root); &lt;0.01 - 0.03 mg/kg (foliage)<br/> Cereals (wheat) whole plant, grain, straw: &lt;0.01 mg/kg<br/> Leafy crops (lettuce, cabbage): ≤0.01 mg/kg</p> |

**Stability of residues (Regulation (EU) N° 283/2013, Annex Part A, point 6.1)**  
**OECD Guideline 506**

| Plant products<br>(Category)                                                                                                                                                                | Commodity                 | T<br>(°C) | Stability (Months)                |
|---------------------------------------------------------------------------------------------------------------------------------------------------------------------------------------------|---------------------------|-----------|-----------------------------------|
|                                                                                                                                                                                             |                           |           | Alpha-cypermethrin <sup>(4)</sup> |
| High water content                                                                                                                                                                          | lettuce leaves            | ≤ -18     | 12 <sup>(4)</sup>                 |
|                                                                                                                                                                                             | tomato fruit              | ≤ -18     | 12 <sup>(4)</sup>                 |
|                                                                                                                                                                                             | oilseed rape whole plants | - 20      | 12 <sup>(4)</sup>                 |
|                                                                                                                                                                                             | cereal whole green plant  | ≤ -18     | 12 <sup>(4)</sup>                 |
| High acid content                                                                                                                                                                           | pineapple fruit           | ≤ - 20    | 24                                |
| High starch content                                                                                                                                                                         | cereal grain              | ≤ -18     | 12 <sup>(4)</sup>                 |
|                                                                                                                                                                                             | barley grain              | ≤ - 20    | 24                                |
| High oil content                                                                                                                                                                            | oilseed rape seeds        | - 20      | 12 <sup>(4)</sup>                 |
| High protein content                                                                                                                                                                        | bean seed                 | ≤ - 20    | 24                                |
| Other                                                                                                                                                                                       | oilseed rape whole pods   | - 20      | 6 <sup>(4)</sup>                  |
|                                                                                                                                                                                             | cereal straw              |           | 12 <sup>(4)</sup>                 |
| <sup>(4)</sup> In most studies, the analytical method used determined the total cypermethrin residues (sum of isomers) and was not validated to be specific for alpha-cypermethrin isomers. |                           |           |                                   |
| Animal                                                                                                                                                                                      | Animal commodity          | T<br>(°C) | Stability (Month)                 |
| Cattle                                                                                                                                                                                      | Muscle                    | ≤ -10°C   | 6                                 |
| Cattle                                                                                                                                                                                      | Liver                     | ≤ -10°C   | 6                                 |
| Cattle                                                                                                                                                                                      | Kidney                    | ≤ -10°C   | 6                                 |
| Cattle                                                                                                                                                                                      | Milk                      | ≤ -10°C   | 9                                 |
| Cattle                                                                                                                                                                                      | Fat                       | ≤ -10°C   | 6                                 |
| Hen                                                                                                                                                                                         | Eggs                      | ≤ -10°C   | 1.5                               |
| Upon frozen storage, residues of alpha-cypermethrin remain stable for at least 6 months in cattle tissues, at least 9 months in cattle milk and at least 1.5 month in hen eggs.             |                           |           |                                   |

## Summary of residues data from the supervised residue trials (Regulation (EU) N° 283/2013, Annex Part A, point 6.3) OECD Guideline 509, OECD Guidance, series on pesticides No 66 and OECD MRL calculator

| Crop (cGAP)                                                                       | Region/<br>Indoor (a) | Residue levels (mg/kg) observed in the supervised residue trials relevant to the supported GAPs (b)                                                                                                            | Recommendations/comments (OECD calculations)                                                                                                                                                                                                                                                                                                                              | MRL proposals (mg/kg) | HR (mg/kg) (c) | STMR (mg/kg) (d) |
|-----------------------------------------------------------------------------------|-----------------------|----------------------------------------------------------------------------------------------------------------------------------------------------------------------------------------------------------------|---------------------------------------------------------------------------------------------------------------------------------------------------------------------------------------------------------------------------------------------------------------------------------------------------------------------------------------------------------------------------|-----------------------|----------------|------------------|
| <b>Representative uses</b>                                                        |                       |                                                                                                                                                                                                                |                                                                                                                                                                                                                                                                                                                                                                           |                       |                |                  |
| <b>Cucumbers</b><br>(extrapolation to courgettes)<br>(1 x 30 g/ha;<br>PHI 3 days) | Indoor                | 1x 40 g/ha:<br>2 x <0.01, 0.012, 2 x 0.014, 0.02, 0.031, 0.037<br>Scaled down to cGAP rate (1x 30 g/ha):<br>2 x <0.01, 0.009, 0.011, 0.011, 0.015, 0.023, 0.028                                                | Proportionality concept applied due to trials being conducted at rate >25% deviating from cGAP rate.<br><b>Data gap:</b> Sufficient residue trials on cucumbers compliant with the indoor GAP and supported by acceptable storage stability data are required in view of the identified acute intake concern.                                                             | <b>0.05</b>           | 0.028          | 0.011            |
| <b>Leafy brassica</b><br>(2 x 10 g/ha;<br>PHI 3 days)                             | NEU                   | Kales:<br>2x 12.5 g/ha:<br>0.23 <sup>(5)</sup> , 0.35, 0.38, 0.59<br>Scaled down to cGAP rate (2x10 g/ha):<br>0.23, 0.28, 0.30, 0.47                                                                           | <sup>(5)</sup> Level measured 3 days after single treatment (1x12.5 g/ha) (0.170 mg/kg found 3 days after 2 treatments). Scaling on this value not applicable.<br><br>Data gap: 2 residue trials and 4 residue trials on kales and compliant respectively with the NEU and SEU outdoor GAP on leafy brassica to be extrapolated to the whole sub-group of leafy brassica. | <b>1</b>              | 0.47           | 0.29             |
| <b>Leafy brassica</b><br>(1 x 20 g/ha;<br>PHI 3 days)                             | SEU                   | Kales:<br>1x 25 g/ha:<br>0.28, 0.44<br>Scaled down to cGAP rate (1x20 g/ha):<br>0.22, 0.35                                                                                                                     |                                                                                                                                                                                                                                                                                                                                                                           |                       |                |                  |
| <b>Lettuces</b><br>(2 x 10 g/ha;<br>PHI 3 days)                                   | NEU                   | 2x 12.5 g/ha:<br><0.01, 0.021, 0.055 <sup>(6)</sup> , 0.072, 0.12, 0.13, 0.22, 0.24, 0.27, 0.72<br>Scaled down to cGAP rate (2x10 g/ha):<br><0.01, 0.017, 0.044, 0.057, 0.096, 0.104, 0.176, 0.192, 0.21, 0.58 | <sup>(6)</sup> Trial on open leaf lettuce variety;<br>Proportionality concept could be applied due to all trials being overdosed (at rate 25% deviating from cGAP rate).<br>Data gap: Sufficient residue trials on lettuces and compliant respectively with the NEU and                                                                                                   | <b>0.9</b>            | <b>0.58</b>    | 0.10             |

| Crop (cGAP)                                                                         | Region/ Indoor (a) | Residue levels (mg/kg) observed in the supervised residue trials relevant to the supported GAPs (b)                                                                                                                                                                                                                        | Recommendations/comments (OECD calculations)                                                                  | MRL proposals (mg/kg) | HR (mg/kg) (c) | STMR (mg/kg) (d) |
|-------------------------------------------------------------------------------------|--------------------|----------------------------------------------------------------------------------------------------------------------------------------------------------------------------------------------------------------------------------------------------------------------------------------------------------------------------|---------------------------------------------------------------------------------------------------------------|-----------------------|----------------|------------------|
|                                                                                     |                    |                                                                                                                                                                                                                                                                                                                            | SEU GAP are required in view of the identified acute intake concern.                                          |                       |                |                  |
| Lettuces<br>(1 x 20 g/ha;<br>PHI 3 days)                                            | SEU                | <i>1x 25 g/ha:</i><br><0.01, 0.10, 0.11 <sup>(6)</sup> , 0.20 <sup>(6)</sup> , 0.21 <sup>(6)</sup> , 0.31 <sup>(6)</sup> , 0.32 <sup>(6)</sup> ,<br>0.39 <sup>(6)</sup> , 0.41 <sup>(6)</sup> , 0.59 <sup>(6)</sup><br>Scaled down to cGAP rate (1x20 g/ha):<br><0.01, 0.08, 0.08, 2 x 0.16, 2 x 0.25, 0.31, 0.33,<br>0.47 |                                                                                                               | 0.8                   | 0.47           | <b>0.21</b>      |
|                                                                                     |                    | <i>2x12.5 g/ha:</i><br>0.032 <sup>(6)</sup> , 0.037, 0.049 <sup>(6)</sup> , 0.075 <sup>(6)</sup> , 0.091 <sup>(6)</sup><br>0.11 <sup>(6)</sup> , 0.21 <sup>(6)</sup> , 0.24 <sup>(6)</sup><br>Scaled down to cGAP rate (2x10 g/ha):<br>0.025, 0.03, 0.04, 0.06, 0.07, 0.088, 0.17, 0.19                                    |                                                                                                               | 0.4                   | 0.19           | 0.07             |
| Oilseed rape (seeds)<br>(2 x 10 g/ha;<br>PHI 28 days)                               | NEU                | <i>2x 12.5 g/ha:</i><br>10 x <0.01                                                                                                                                                                                                                                                                                         |                                                                                                               | <b>0.07</b>           | 0.01           | 0.01             |
|                                                                                     | SEU                | 7 x <0.01, 0.012, 0.015, <0.05, 0.06                                                                                                                                                                                                                                                                                       |                                                                                                               |                       | 0.06           | 0.01             |
|                                                                                     | NEU + SEU          | 17 x <0.01, 0.012, 0.015, <0.05, 0.06                                                                                                                                                                                                                                                                                      | Populations similar (U-test; $\alpha=0.05$ )<br>MRL proposal derived from merged datasets.                    |                       | <b>0.06</b>    | <b>0.01</b>      |
| Barley (grain)<br>(2 x 10 g/ha;<br>PHI 28 days)<br>(extrapolation to<br>oats grain) | NEU                | <i>2x 12.5 g/ha:</i><br>0.02, 0.03, 0.031, 0.032, 0.035, 0.053, 0.077,<br>0.079<br>Scaled down to cGAP rate (2x10 g/ha):<br>0.016, 0.024, 0.025, 0.026, 0.028, 0.042, 0.062,<br>0.063                                                                                                                                      | Proportionality concept applied due to all trials being overdosed (at rate ca. 25% deviating from cGAP rate). | <b>0.15</b>           | 0.063          | 0.027            |
|                                                                                     | SEU                | <i>2x 12.5 g/ha:</i><br>0.024, 0.026, 0.035, 0.05, 0.066, 0.079, 0.083                                                                                                                                                                                                                                                     | Proportionality concept applied due to all trials being overdosed (at rate ca. 25% deviating from             |                       | 0.066          | 0.034            |

| Crop (cGAP)                                                                                        | Region/<br>Indoor<br>(a) | Residue levels (mg/kg) observed in the supervised residue trials relevant to the supported GAPs (b)                                                      | Recommendations/comments (OECD calculations)                                                              | MRL proposals (mg/kg) | HR (mg/kg) (c) | STMR (mg/kg) (d) |
|----------------------------------------------------------------------------------------------------|--------------------------|----------------------------------------------------------------------------------------------------------------------------------------------------------|-----------------------------------------------------------------------------------------------------------|-----------------------|----------------|------------------|
|                                                                                                    |                          | Scaled down to cGAP rate (2x10 g/ha):<br>0.019, 0.021, 0.028, 0.040, 0.047, 0.063, 0.066                                                                 | cGAP rate).<br>Data gap: 1 additional residue trial on barley and compliant with the SEU GAP is required. |                       |                |                  |
|                                                                                                    | NEU + SEU                | Scaled residue values:<br>0.016, 0.019, 0.021, 0.024, 0.025, 0.026, 0.028, 0.028, 0.040, 0.042, 0.047, 0.062, 0.063, 0.063, 0.066                        | Populations similar (U-test; $\alpha=0.05$ );<br>MRL proposal derived from merged scaled datasets.        |                       | <b>0.066</b>   | <b>0.028</b>     |
| <b>Wheat (grain)</b><br>(2 x 10 g/ha;<br>PHI 28 days)<br>(extrapolation to<br><b>rye grain</b> )   | NEU                      | 5 x <0.01                                                                                                                                                |                                                                                                           | <b>0.01*</b>          | 0.01           | 0.01             |
|                                                                                                    | SEU                      | 10 x <0.01                                                                                                                                               |                                                                                                           |                       | 0.01           | 0.01             |
| <b>Barley (straw)</b><br>(2 x 10 g/ha;<br>PHI 28 days)<br>(extrapolation to<br><b>oats straw</b> ) | NEU                      | 2x12.5 g/ha:<br>0.20, 0.25, 0.26, 0.35, 0.41, 0.47, 0.48, 0.49<br>Scaled down to cGAP rate (2x10 g/ha):<br>0.16, 0.2, 0.21, 0.28, 0.33, 0.37, 0.38, 0.39 |                                                                                                           | n.a.                  | 0.39           | 0.31             |
|                                                                                                    | SEU                      | 2x12.5 g/ha:<br>0.21, 0.24, 2x 0.40, 0.43, 0.47, 0.68<br>Scaled down to cGAP rate (2x10 g/ha):<br>0.17, 0.19, 0.32, 0.32, 0.34, 0.37, 0.54               |                                                                                                           | n.a.                  | 0.54           | 0.32             |
|                                                                                                    | NEU + SEU                | Scaled residue values:<br>0.16, 0.17, 0.19, 0.2, 0.21, 0.28, 0.32, 0.32, 0.33, 0.34, 0.37, 0.37, 0.38, 0.39, 0.54                                        |                                                                                                           | n.a.                  | <b>0.54</b>    | <b>0.32</b>      |
| <b>Wheat (straw)</b><br>(2 x 10 g/ha;<br>PHI 28 days)<br>(extrapolation to<br><b>rye straw</b> )   | NEU                      | 2x12.5 g/ha:<br>0.29, 0.36, 2 x 0.40, 0.53<br>Scaled down to cGAP rate (2x10 g/ha):<br>0.23, 0.29, 0.32, 0.32, 0.42                                      |                                                                                                           | n.a.                  | 0.42           | 0.32             |
|                                                                                                    | SEU                      | 2x12.5 g/ha:<br>0.18, 0.33, 0.35, 0.37, 0.47, 0.54, 0.62, 0.82, 2 x 1.04                                                                                 |                                                                                                           | n.a.                  | 0.86           | 0.39             |

| Crop (cGAP)                                                                                                                                                           | Region/<br>Indoor<br>(a)                  | Residue levels (mg/kg) observed in the supervised residue trials relevant to the supported GAPs (b)                                                                            | Recommendations/comments (OECD calculations)                                                                                                                                                                                                                                                                   | MRL proposals (mg/kg) | HR (mg/kg) (c) | STMR (mg/kg) (d) |
|-----------------------------------------------------------------------------------------------------------------------------------------------------------------------|-------------------------------------------|--------------------------------------------------------------------------------------------------------------------------------------------------------------------------------|----------------------------------------------------------------------------------------------------------------------------------------------------------------------------------------------------------------------------------------------------------------------------------------------------------------|-----------------------|----------------|------------------|
|                                                                                                                                                                       |                                           | Scaled down to cGAP rate (2x10 g/ha):<br>0.14, 0.26, 0.28, 0.3, 0.37, 0.4, 0.43, 0.68, 0.68, 0.86                                                                              |                                                                                                                                                                                                                                                                                                                |                       |                |                  |
|                                                                                                                                                                       | NEU + SEU                                 | Scaled residue values:<br>0.14, 0.23, 0.26, 0.28, 0.29, 0.3, 0.32, 0.32, 0.37, 0.4, 0.42, 0.43, 0.68, 0.68, 0.86                                                               |                                                                                                                                                                                                                                                                                                                | n.a.                  | 0.86           | 0.32             |
| <b>Barley &amp; Wheat (straw)</b><br>(2 x 10 g/ha;<br>PHI 28 days)                                                                                                    | NEU + SEU                                 | Scaled residue values:<br>0.14, 0.16, 0.17, 0.19, 0.2, 0.21, 0.23, 0.26, 2 x 0.28, 0.29, 0.3, 4 x 0.32, 0.33, 0.34, 3 x 0.37, 0.38 0.39, 0.4, 0.42, 0.43, 0.54, 2 x 0.68, 0.86 | Datasets on barley straw (n=16) and wheat straw (20) were merged, as populations are similar (U-test; $\alpha=0.05$ ).<br>Extrapolation to rye and oats straw.                                                                                                                                                 | n.a.                  | <b>0.86</b>    | <b>0.32</b>      |
| <b>MRL application</b>                                                                                                                                                |                                           |                                                                                                                                                                                |                                                                                                                                                                                                                                                                                                                |                       |                |                  |
| Leafy brassica                                                                                                                                                        | See assessment for the representative use |                                                                                                                                                                                |                                                                                                                                                                                                                                                                                                                |                       |                |                  |
| <b>Summary of the data on formulation equivalence <a href="#">OECD Guideline 509</a></b>                                                                              |                                           |                                                                                                                                                                                |                                                                                                                                                                                                                                                                                                                |                       |                |                  |
| <b>Crop</b>                                                                                                                                                           | <b>Region</b>                             | <b>Residue data (mg/kg)</b>                                                                                                                                                    | <b>Recommendations/comments</b>                                                                                                                                                                                                                                                                                |                       |                |                  |
| The equivalence between the different formulations used in the residue trials was demonstrated from bridging studies conducted on fruit crops, potatoes and lettuces. |                                           |                                                                                                                                                                                |                                                                                                                                                                                                                                                                                                                |                       |                |                  |
| <b>Summary of data on residues in pollen and bee products (Regulation (EU) No 283/2013, Annex Part A, point 6.10.1)</b>                                               |                                           |                                                                                                                                                                                |                                                                                                                                                                                                                                                                                                                |                       |                |                  |
| <b>Product(s)</b>                                                                                                                                                     | <b>Region</b>                             | <b>Residue data (mg/kg)</b>                                                                                                                                                    | <b>Recommendations/comments</b>                                                                                                                                                                                                                                                                                |                       |                |                  |
| Nectar & pollen (oilseed rape)                                                                                                                                        | Germany (4 locations)                     | Nectar: <0.01 – 0.046<br>Pollen: 0.34 – 1.2                                                                                                                                    | Oilseed rape crop covered by tunnel; treated at 1x30 g/ha (BBCH 63-65); Only results for nectar collected from forager bees and pollen collected via pollen traps (1 DAA) are presented. Considerable reduction of residue levels was observed at later sampling occasions: <i>see conclusions DRAR Vol.1.</i> | -                     | -              | -                |
| Nectar & pollen ( <i>Phacelia</i> )                                                                                                                                   | Germany (1 location)                      | Nectar: <0.01<br>Pollen: <0.01 – 0.01                                                                                                                                          | <i>Phacelia tanacetifolia</i> ; 1x30 g/ha at 80% flowering; pollen collected via pollen trap and nectar collected from hives (7 and/or 14 DAA)                                                                                                                                                                 | -                     | -              | -                |
| Nectar & pollen                                                                                                                                                       | Germany (4                                | Honey/nectar: <0.01                                                                                                                                                            | <i>Phacelia tanacetifolia</i> ; 1x30 g/ha pollen and                                                                                                                                                                                                                                                           | -                     | -              | -                |

| Crop<br>(cGAP)                                                                                                                                                                                                                                                                                                                                                                                                                                                                                                                                                                              | Region/<br>Indoor<br>(a)          | Residue levels (mg/kg) observed in the supervised residue trials relevant to the supported GAPs<br>(b) | Recommendations/comments<br>(OECD calculations)     | MRL proposals<br>(mg/kg) | HR<br>(mg/kg)<br>(c) | STMR<br>(mg/kg)<br>(d) |
|---------------------------------------------------------------------------------------------------------------------------------------------------------------------------------------------------------------------------------------------------------------------------------------------------------------------------------------------------------------------------------------------------------------------------------------------------------------------------------------------------------------------------------------------------------------------------------------------|-----------------------------------|--------------------------------------------------------------------------------------------------------|-----------------------------------------------------|--------------------------|----------------------|------------------------|
| <i>(Phacelia)</i>                                                                                                                                                                                                                                                                                                                                                                                                                                                                                                                                                                           | locations) and Italy (1 location) | Pollen: <0.01 – 0.026                                                                                  | honey/nectar collected from hives (7 and/or 14 DAA) |                          |                      |                        |
| <p>Considering that a low translocation of alpha-cypermethrin residues in the different plant parts was observed in the plant metabolism and taking into account the lipophilic properties of the active substance, further residue trials for the determination of residues of alpha-cypermethrin and its relevant metabolites in honey in regards to the representative uses are not required to address the data requirement for the determination of residues in pollen and bee products for human consumption resulting from residues taken up by honeybees from crops at blossom.</p> |                                   |                                                                                                        |                                                     |                          |                      |                        |

- (a): **NEU** or **SEU** for northern or southern **outdoor** trials in EU member states (**N+SEU** if both zones), **Indoor** for glasshouse/protected crops, **Country** if non-EU location.
  - (b): Residue levels in trials conducted according to GAP reported in ascending order (e.g. 3x <0.01, 0.01, 6x 0.02, 0.04, 0.08, 3x 0.10, 2x 0.15, 0.17). When residue definition for monitoring and risk assessment differs, use **Mo/RA** to differentiate data expressed according to the residue definition for **Monitoring** and **Risk Assessment**.
  - (c): **HR**: Highest residue. When residue definition for monitoring and risk assessment differs, HR according to residue definition for monitoring reported in brackets (HR<sub>Mo</sub>).
  - (d): **STMR**: Supervised Trials Median Residue. When residue definition for monitoring and risk assessment differs, STMR according to definition for monitoring reported in brackets (STMR<sub>Mo</sub>).
- (\*): Residue trials not supported by the available storage stability data for total cypermethrin residues.



## Inputs for animal burden calculations

| Feed commodity                                     | Median dietary burden |                                                                      | Maximum dietary burden |                                                                      |
|----------------------------------------------------|-----------------------|----------------------------------------------------------------------|------------------------|----------------------------------------------------------------------|
|                                                    | (mg/kg)               | Comment                                                              | (mg/kg)                | Comment                                                              |
| Kale leaves                                        | 0.29                  |                                                                      | 0.47                   |                                                                      |
| Cereal straw (barley, oat, wheat, triticale, rye)  | 0.32                  | STMR<br>(merged data wheat/barley)                                   | 0.83                   | HR<br>(merged data wheat/barley)                                     |
| Cereal grain (barley, oat)                         | 0.028                 | STMR                                                                 | 0.028                  | STMR                                                                 |
| Cereal grain (wheat, triticale, rye)               | 0.01                  | STMR                                                                 | 0.01                   | STMR                                                                 |
| Brewer's grain (dried)                             | 0.026                 | STMR-P<br>= STMR (barley grain) x 0.93 (PF spent barley grain)       | 0.026                  | STMR-P<br>= STMR (barley grain) x 0.93 (PF)                          |
| Canola / Rapeseed meal                             | 0.01                  | STMR                                                                 | 0.01                   | STMR                                                                 |
| Distiller's grain (dried)                          | 0.026                 | STMR-P<br>= STMR (barley grain) x 0.93 (PF spent barley grain)       | 0.026                  | STMR-P<br>= STMR (barley grain) x 0.93 (PF spent barley grain)       |
| Wheat gluten meal                                  | 0.059                 | STMR-P<br>= STMR (wheat grain) x 5.85 (PF pearling barley dust/bran) | 0.059                  | STMR-P<br>= STMR (wheat grain) x 5.85 (PF pearling barley dust/bran) |
| Wheat, milled by-products<br>(covering wheat bran) | 0.059                 | STMR-P<br>= STMR (wheat grain) x 5.85 (PF pearling barley dust/bran) | 0.059                  | STMR-P<br>= STMR (wheat grain) x 5.85 (PF pearling barley dust/bran) |

**Residues from livestock feeding studies (Regulation (EU) N° 283/2013, Annex Part A, points 6.4.1, 6.4.2, 6.4.3 and 6.4.4)  
 OECD Guideline 505 and OECD Guidance, series on pesticides No 73**

| MRL calculations                                                                       | Ruminant                                                              |                           |                                   |                        | Pig/Swine                         |                             | Poultry                           |                             | Fish                                                                         |                             |
|----------------------------------------------------------------------------------------|-----------------------------------------------------------------------|---------------------------|-----------------------------------|------------------------|-----------------------------------|-----------------------------|-----------------------------------|-----------------------------|------------------------------------------------------------------------------|-----------------------------|
|                                                                                        | <b>Highest expected intake</b><br>(mg/kg bw/d)<br>(mg/kg DM for fish) | Beef cattle               | 0.016                             | Ram/Ewe                | 0.020                             | Breeding                    | 0.008                             | Broiler                     | 0.002                                                                        | Carp                        |
|                                                                                        | Dairy cattle                                                          | 0.026                     | Lamb                              | 0.026                  | Finishing                         | 0.001                       | Layer                             | 0.009                       | Trout                                                                        | 0.057                       |
|                                                                                        |                                                                       |                           |                                   |                        |                                   |                             | Turkey                            | 0.002                       | Fish intake >0.1 mg/kg DM                                                    |                             |
| Intake >0.004 mg/kg bw                                                                 | Yes                                                                   |                           | Yes                               |                        | Yes                               |                             | Yes                               |                             | No                                                                           |                             |
| Feeding study submitted                                                                | Yes                                                                   |                           | No                                |                        | No                                |                             | Yes                               |                             | No (feeding level of metabolism study presented)                             |                             |
| <b>Representative feeding level</b> (mg/kg bw/d, mg/kg DM for fish) and <b>N rates</b> | Level 0.1                                                             | Beef: 6 N<br>Dairy: 3.8 N | Level 0.1                         | Lamb: 3.8 N<br>Ewe: 5N | Level 0.1                         | Breed/Finish: 12.5 N /100 N | Level 0.1                         | B or T: 33 N<br>Layer: 11 N | Level 10                                                                     | Carp: 208 N<br>Trout: 175 N |
|                                                                                        | Estimated HR <sup>(a)</sup> at 1N                                     | <b>MRL proposals</b>      | Estimated HR <sup>(a)</sup> at 1N | <b>MRL proposals</b>   | Estimated HR <sup>(a)</sup> at 1N | <b>MRL proposals</b>        | Estimated HR <sup>(a)</sup> at 1N | <b>MRL proposals</b>        | Estimated HR <sup>(a)</sup> at 1N                                            | <b>MRL proposals</b>        |
| Muscle                                                                                 | <0.05                                                                 | 0.05*                     | <0.05                             | 0.05*                  | <0.05                             | 0.05*                       | <0.05                             | 0.05*                       | <0.01                                                                        | 0.05*                       |
| Fat                                                                                    | (0.020)                                                               | 0.05*                     | (0.046)                           | 0.05*                  | (0.012)                           | 0.05*                       | <0.05                             | 0.05*                       | <0.01                                                                        | 0.05*                       |
| Meat <sup>(b)</sup>                                                                    | <0.05                                                                 |                           | <0.05                             |                        | <0.05                             |                             | <0.05                             |                             |                                                                              |                             |
| Liver                                                                                  | <0.05                                                                 | 0.05*                     | <0.05                             | 0.05*                  | <0.05                             | 0.05*                       | <0.05                             | 0.05*                       |                                                                              |                             |
| Kidney                                                                                 | <0.05                                                                 | 0.05*                     | <0.05                             | 0.05*                  | <0.05                             | 0.05*                       | -                                 | 0.05*                       |                                                                              |                             |
| Milk <sup>(a)</sup>                                                                    | <0.01                                                                 | 0.01*                     | <0.01                             | 0.01*                  |                                   |                             |                                   |                             |                                                                              |                             |
| Eggs                                                                                   |                                                                       |                           |                                   |                        |                                   |                             | <0.01                             | 0.05*                       |                                                                              |                             |
| Method of calculation <sup>(c)</sup>                                                   | Tf                                                                    |                           | Tf                                |                        | Tf                                |                             | Tf                                |                             | residue levels estimated by extrapolation (Tf) from metabolism study results |                             |

<sup>(a)</sup>: Estimated HR calculated at 1N level (**estimated mean level for milk**).

<sup>(b)</sup>: HR in meat calculated for mammalian on the basis of 20% fat + 80% muscle and 10% fat + 90% muscle for poultry

<sup>(c)</sup>: The OECD guidance document on residues in livestock (series on pesticides 73) recommends three different approaches to derive MRLs for animal products; by applying a transfer factor (Tf), by intrapolation (It) or by linear regression (Ln). Fill in method(s) considered to derive the MRL proposals.

| STMR calculations                                                                               | Ruminant                                                             |                                                  |                                   |                                                  | Pig/Swine                         |                                                  | Poultry                           |                                                  | Fish                                                                         |                                                  |
|-------------------------------------------------------------------------------------------------|----------------------------------------------------------------------|--------------------------------------------------|-----------------------------------|--------------------------------------------------|-----------------------------------|--------------------------------------------------|-----------------------------------|--------------------------------------------------|------------------------------------------------------------------------------|--------------------------------------------------|
|                                                                                                 | <b>Median expected intake</b><br>(mg/kg bw/d)<br>(mg/kg DM for fish) | Beef cattle                                      | 0.0103                            | Ram/Ewe                                          | 0.0088                            | Breeding                                         | 0.006                             | Broiler                                          | 0.002                                                                        | Carp                                             |
|                                                                                                 | Dairy cattle                                                         | 0.0165                                           | Lamb                              | 0.0112                                           | Finishing                         | 0.001                                            | Layer                             | 0.005                                            | Trout                                                                        | 0.057                                            |
|                                                                                                 |                                                                      |                                                  |                                   |                                                  |                                   |                                                  | Turkey                            | 0.002                                            |                                                                              |                                                  |
| <b>Representative feeding level</b><br>(mg/kg bw/d,<br>mg/kg DM for fish) and<br><b>N rates</b> | Level<br>0.1                                                         | Beef: 10 N<br>Dairy: 6N                          | Level<br>0.1                      | Lamb: 9N<br>Ewe:11.3N                            | Level<br>0.1                      | Breed/Finish<br>17N/100N                         | Level<br>0.1                      | B or T: 33N<br>Layer: 20N                        | Level<br>10                                                                  | Carp: 208 N<br>Trout: 175 N                      |
|                                                                                                 | Mean level<br>in feeding<br>level                                    | Estimated<br><b>STMR</b> <sup>(b)</sup><br>at 1N | Mean level<br>in feeding<br>level | Estimated<br><b>STMR</b> <sup>(b)</sup><br>at 1N | Mean level<br>in feeding<br>level | Estimated<br><b>STMR</b> <sup>(b)</sup><br>at 1N | Mean level<br>in feeding<br>level | Estimated<br><b>STMR</b> <sup>(b)</sup><br>at 1N | Mean<br>level<br>in feeding<br>level                                         | Estimated<br><b>STMR</b> <sup>(b)</sup><br>at 1N |
| Muscle                                                                                          | <0.05                                                                | <0.05                                            | <0.05                             | <0.05                                            | <0.05                             | <0.05                                            | <0.05                             | <0.05                                            | <0.01                                                                        | <0.01                                            |
| Fat                                                                                             | 0.056                                                                | <0.05                                            | 0.056                             | <0.05                                            | 0.056                             | <0.05                                            | <0.05                             | <0.05                                            | <0.01                                                                        | <0.01                                            |
| Meat <sup>(a)</sup>                                                                             | <0.05                                                                | <0.05                                            | <0.05                             | <0.05                                            | <0.05                             | <0.05                                            | <0.05                             | <0.05                                            |                                                                              |                                                  |
| Liver                                                                                           | <0.05                                                                | <0.05                                            | <0.05                             | <0.05                                            | <0.05                             | <0.05                                            | <0.05                             | <0.05                                            |                                                                              |                                                  |
| Kidney                                                                                          | <0.05                                                                | <0.05                                            | <0.05                             | <0.05                                            | <0.05                             | <0.05                                            | -                                 | -                                                |                                                                              |                                                  |
| Milk                                                                                            | <0.01                                                                | <0.01                                            | <0.01                             | <0.01                                            |                                   |                                                  |                                   |                                                  |                                                                              |                                                  |
| Eggs                                                                                            |                                                                      |                                                  |                                   |                                                  |                                   |                                                  | <0.01                             | <0.01                                            |                                                                              |                                                  |
| Method of calculation <sup>(c)</sup>                                                            | Tf                                                                   |                                                  | Tf                                |                                                  | Tf                                |                                                  | Tf                                |                                                  | residue levels estimated by extrapolation (Tf) from metabolism study results |                                                  |

<sup>(a)</sup>: STMR in meat calculated for mammalian on the basis of 20% fat + 80% muscle and 10% fat + 90% muscle for poultry

<sup>(b)</sup>: When the mean level is set at the LOQ, the STMR is set at the LOQ.

<sup>(c)</sup>: The OECD guidance document on residues in livestock (series on pesticide 73) recommends three different approaches to derive MRLs for animal products; by applying a transfer factor (Tf), by intrapolation (It) or by linear regression (Ln). Fill in method(s) considered to derive the MRL proposals.

### Conversion Factors (CF) for monitoring to risk assessment

Not applicable; The relatively higher toxicological potency of alpha-cypermethrin compared to cypermethrin is considered in the risk assessment by applying the toxicological reference values for alpha-cypermethrin.

#### Processing factors (Regulation (EU) N° 283/2013, Annex Part A, points 6.5.2 and 6.5.3)

##### OECD Guideline 508 and OECD Guidance, series on testing and assessment No 96

| Crop (RAC)/Edible part or Crop (RAC)/Processed product         | Number of studies <sup>(a)</sup> | Processing Factor (PF)                   |           | Conversion Factor (CF <sub>p</sub> ) for RA <sup>(b)</sup> |
|----------------------------------------------------------------|----------------------------------|------------------------------------------|-----------|------------------------------------------------------------|
|                                                                |                                  | Individual values                        | Median PF |                                                            |
| Gherkins / washed                                              | 1                                | 0.24, 0.55, 0.80 <sup>(7)</sup>          | 0.55      | -                                                          |
| Gherkin / wash water                                           | 1                                | 0.42, 0.60, <0.67 <sup>(7)</sup>         | 0.60      | -                                                          |
| Gherkins / canned                                              | 1                                | 0.39, 0.65, 1.2 <sup>(7)</sup>           | 0.65      | -                                                          |
| Gherkins / vegetable stock                                     | 1                                | <0.26, <0.50, <0.67 <sup>(7)</sup>       | <0.50     | -                                                          |
| Barley / malt                                                  | 2                                | 0.22, 0.45, 0.59, 0.73, 0.74, 1.09       | 0.66      | -                                                          |
| Barley / malt germs, malt culms                                | 2                                | 0.18, 1.37, 2.21, 2.50, 2.91, 5.09       | 2.4       | -                                                          |
| Barley / spent grain                                           | 2                                | 0.23, 0.76, 0.86, 1.0, 1.18, 1.68        | 0.93      | -                                                          |
| Spent hops                                                     |                                  | 0.18 (2x), 0.19, 0.32                    | 0.19      | -                                                          |
| Spent yeast                                                    |                                  | <0.03, <0.04, <0.05, <0.09               | <0.05     | -                                                          |
| Trub                                                           | 1                                | <0.17, <0.53                             | <0.35     | -                                                          |
| Yeast                                                          | 1                                | <0.17, <0.53                             | <0.35     | -                                                          |
| Beer                                                           | 2                                | <0.03, <0.04, <0.05, <0.09, <0.17, <0.53 | <0.07     | -                                                          |
| Barley / flour (side product of dehulling barley)              | 1                                | 6.48, 7.59, 8.35, 12.27                  | 7.97      | -                                                          |
| Barley / pearling dust/bran (side product of dehulling barley) | 1                                | 4.91, 5.50, 6.19, 6.55                   | 5.85      | -                                                          |
| Pot barley (dehulled barley)                                   | 1                                | 0.04, 0.09, 0.12, 0.14                   | 0.11      | -                                                          |
| Rapeseed / meal (press cake)                                   | 2                                | <1, <1                                   | <1        | -                                                          |
| Rapeseed / oil (refined, crude)                                | 1                                | <1                                       | n.a.      | -                                                          |

<sup>(7)</sup> mean of values determined for processed commodities derived from RAC samples originating from 2 dependent supervised residue trials

<sup>(a)</sup>: Studies with residues in the RAC at or close to the LOQ should be disregarded (unless concentration)

<sup>(b)</sup>: When the residue definition for risk assessment differs from the residue definition for monitoring

## Consumer risk assessment (Regulation (EU) N° 283/2013, Annex Part A, point 6.9)

### Consumer risk assessment limited to the representative uses<sup>(8)</sup>

<sup>(8)</sup> The consumer dietary risk assessment cannot be finalised considering the provisional residue definitions for risk assessment in plants and animal commodities and the identified data gaps for additional residue trials on cucumbers, kales, lettuces and barley.

|                                                 |                                                                                                                                                                                                                                                                         |
|-------------------------------------------------|-------------------------------------------------------------------------------------------------------------------------------------------------------------------------------------------------------------------------------------------------------------------------|
| <b>ADI</b>                                      | 0.00125 mg/kg bw per day                                                                                                                                                                                                                                                |
| TMDI according to EFSA PRIMo (rev.2)            | Highest TMDI: 67% ADI (NL child)                                                                                                                                                                                                                                        |
| NTMDI, according to (to be specified)           | Not applicable                                                                                                                                                                                                                                                          |
| IEDI (% ADI), according to EFSA PRIMo (rev.2)   | Not applicable                                                                                                                                                                                                                                                          |
| NEDI (% ADI), according to (to be specified)    |                                                                                                                                                                                                                                                                         |
| Factors included in the calculations            | MRLs derived for the representative uses; MRL of 0.05* mg/kg for animal matrices and poultry eggs; MRL of 0.01* mg/kg for milk.                                                                                                                                         |
| <b>ARfD</b>                                     | 0.00125 mg/kg bw                                                                                                                                                                                                                                                        |
| IESTI (% ARfD), according to EFSA PRIMo (rev.2) | <b>2541%</b> (kales – NL child)<br><b>1248%</b> (lettuces – DE child)<br><b>131%</b> (cucumbers – NL child)<br><b>104%</b> (courgettes – UK toddler)<br>99.4% (Milk and milk products – UK infant)<br>Max. 38% (barley grain – NL adult)<br>5.3% (rape seed – DE child) |
| NESTI (% ARfD), according to (to be specified)  | Not applicable                                                                                                                                                                                                                                                          |
| Factors included in IESTI and NESTI             | Highest residue values for the representative uses; 0.05 mg/kg for animal matrices and 0.01 mg/kg for milk and eggs.                                                                                                                                                    |

### Indicative scening of the safety of the current EU MRLs for cypermethin (sum of isomers) (as established by Commission Regulation(EU) No 2017/626).

|                                               |                                                                                                                                                                     |
|-----------------------------------------------|---------------------------------------------------------------------------------------------------------------------------------------------------------------------|
| TMDI (% ADI), according to EFSA PRIMo (rev.2) | Highest TMDI: 3309 % ADI (UK toddler)                                                                                                                               |
| NTMDI (% ADI), according to (to be specified) | Not applicable                                                                                                                                                      |
| IEDI (% ADI), according to EFSA PRIMo (rev.2) | Calculation not performed                                                                                                                                           |
| NEDI (% ADI), according to (to be specified)  | Not applicable                                                                                                                                                      |
| Factors included in the calculations          | EU MRLs (Reg. (EU) No 2017/626)                                                                                                                                     |
| IESTI (% ARfD, according to EFSA PRIMo rev.2) | 21219 % ARfD (oranges)<br>14272 % ARfD (grapefruits)<br>13988 % ARfD (scaroles)<br>9423 % ARfD (peaches)<br>7921 % ARfD (orange juice)<br>4076 % ARfD (apple juice) |
| NESTI (% ARfD, according to (to be specified) | Not applicable                                                                                                                                                      |

Factors included in IESTI and NESTI

EU MRLs (Reg. (EU) No 2017/626)

### Proposed MRLs (Regulation (EU) No 283/2013, Annex Part A, points 6.7.2 and 6.7.3)

**Note: The safety of the derived MRLs can only be concluded once the assessment of the genotoxic potential of 3-phenoxybenzoic acid (3-PBA) and review of the preliminary conclusions on the whole group of related metabolites bearing the 3-phenoxybenzoyl moiety (i.e. 4-OH-PBA, 4-OH-PBA sulfate, 3-PBA, 3-PBAldehyde) is finalised. The proposed MRLs have therefore all to be considered tentative.**

| Code <sup>(a)</sup>          | Commodity/Group                                                                                  | MRL/Import tolerance <sup>(b)</sup> ( mg/kg) and Comments |                                                                                                                                                                                                                              |
|------------------------------|--------------------------------------------------------------------------------------------------|-----------------------------------------------------------|------------------------------------------------------------------------------------------------------------------------------------------------------------------------------------------------------------------------------|
| <b>Plant commodities</b>     |                                                                                                  |                                                           |                                                                                                                                                                                                                              |
| <b>Representative uses</b>   |                                                                                                  |                                                           |                                                                                                                                                                                                                              |
| 0232010                      | Cucumbers                                                                                        | -                                                         | No MRL proposal (acute intake concern identified)                                                                                                                                                                            |
| 0232030                      | Courgettes                                                                                       | -                                                         | Extrapolation from cucumbers;<br>No MRL proposal (acute intake concern identified)                                                                                                                                           |
| 0243000                      | Leafy brassica                                                                                   | -                                                         | No MRL proposal -Insufficient residue trials on kales to be extrapolated to the whole sub-group of leafy brassica (data gap) (acute intake concern identified for kales).                                                    |
| 0251020                      | Lettuces                                                                                         | -                                                         | No MRL proposal (acute intake concern identified)                                                                                                                                                                            |
| 0401060                      | Oilseed rape seeds                                                                               | 0.07                                                      |                                                                                                                                                                                                                              |
| 0500010                      | Barley                                                                                           | 0.15                                                      | Provisional (Data gap: 1 additional residue trial on barley and compliant with the SEU GAP is required)                                                                                                                      |
| 0500050                      | Oats                                                                                             | 0.15                                                      | Provisional (Extrapolation from barley)                                                                                                                                                                                      |
| 0500070                      | Rye                                                                                              | 0.01*                                                     | Extrapolation from wheat                                                                                                                                                                                                     |
| 0500090                      | Wheat                                                                                            | 0.01*                                                     |                                                                                                                                                                                                                              |
| <b>MRL application</b>       |                                                                                                  |                                                           |                                                                                                                                                                                                                              |
| 0243000                      | Leafy brassica                                                                                   | -                                                         | No MRL proposal-Insufficient trials on kales to be extrapolated to the whole sub-group of leafy brassica (data gap) and acute intake concern identified for kales.                                                           |
| <b>Animal commodities</b>    |                                                                                                  |                                                           |                                                                                                                                                                                                                              |
| 1000000<br>except<br>1020000 | Products of animal origin – terrestrial animals                                                  | 0.05*                                                     | MRL proposals derived considering representative uses only.                                                                                                                                                                  |
| 1020000                      | Milk                                                                                             | 0.01*                                                     | For (cattle) milk, there is an acute intake concern for residues above 0.01 mg/kg. However, further method validation may be required to enforce an MRL at this level (see section 1).                                       |
| 1030000                      | Birds eggs                                                                                       | 0.05*                                                     |                                                                                                                                                                                                                              |
| 1100000                      | Products of animal origin –Fish, fish products and any other marine and freshwater food products | 0.05*                                                     | EU MRLs for cypermethrin (sum of isomers) in <i>Salmonidae</i> fish (in muscle and skin in natural proportions: 0.05 mg/kg) have been established by Commission Regulation (EU) No 37/2010 for its use as a veterinary drug. |

(a): Commodity code number, as listed in Annex I of Regulation (EC) No 396/2005

(b): MRLs proposed at the LOQ, should be annotated by an asterisk (\*) after the figure.

## Environmental fate and behaviour

### Route of degradation (aerobic) in soil (Regulation (EU) N° 283/2013, Annex Part A, point 7.1.1.1)

|                                                                                                  |                                                                                                                                                                                                                                                                                                                         |
|--------------------------------------------------------------------------------------------------|-------------------------------------------------------------------------------------------------------------------------------------------------------------------------------------------------------------------------------------------------------------------------------------------------------------------------|
| Mineralisation after 100 days                                                                    | 32.0 – 41.4% after 91-120 days (n= 3), cyclopropane label<br>33.0 – 51.4% after 91-120 days (n = 4), benzyl label                                                                                                                                                                                                       |
| Non-extractable residues after 100 days                                                          | 23.5 – 36.9% after 91-120 days (n= 3), cyclopropane label<br>32.2 – 44.7% after 91-120 days (n = 4), benzyl label                                                                                                                                                                                                       |
| Metabolites requiring further consideration - name and/or code, % of applied (range and maximum) | <b>DCVA</b> , 13.6% (cis-DCVA) at 7 days (n=1), cyclopropane<br><b>M310I017</b> , 7.5 – 8.4% at 7-30 days (n=7), cyclopropane and benzyl labels<br><b>3-PBA</b> , 1.9 – 5.4% at 7 days (n=2), benzyl label<br>The formation of trans isomers (trans-cypermethrin and trans-DCVA) from cis-cypermethrin is not observed. |

### Route of degradation (anaerobic) in soil (Regulation (EU) N° 283/2013, Annex Part A, point 7.1.1.2)

|                                                                                                                             |                                                                                                                                                                                                                                                                                                                                 |
|-----------------------------------------------------------------------------------------------------------------------------|---------------------------------------------------------------------------------------------------------------------------------------------------------------------------------------------------------------------------------------------------------------------------------------------------------------------------------|
| Mineralisation after 100 days                                                                                               | 7.8% after 90 days, benzyl-label (n=1)<br>6.6% after 90 days, cyclopropane-label (n=1)                                                                                                                                                                                                                                          |
| Non-extractable residues after 100 days                                                                                     | 29.6% after 90 days, benzyl-label (n=1)<br>14.0% after 90 days, cyclopropane-label (n=1)                                                                                                                                                                                                                                        |
| Metabolites that may require further consideration for risk assessment - name and/or code, % of applied (range and maximum) | <b>DCVA</b> , max. 55.6% (cis-DCVA) after 120 days (n=1), cyclopropane label<br><b>3-PBA</b> , max. 30.0% after 120 days (n=1), benzyl label<br><b>M310I017</b> , max. 7.0% after 8 days (n=1), cyclopropane label<br>The formation of trans isomers (trans-cypermethrin and trans-DCVA) from cis-cypermethrin is not observed. |

### Route of degradation (photolysis) on soil (Regulation (EU) N° 283/2013, Annex Part A, point 7.1.1.3)

|                                                                                                                             |                                                                                                                                                                                                                                             |
|-----------------------------------------------------------------------------------------------------------------------------|---------------------------------------------------------------------------------------------------------------------------------------------------------------------------------------------------------------------------------------------|
| Metabolites that may require further consideration for risk assessment - name and/or code, % of applied (range and maximum) | <b>3-PBA</b> , max. 17.9% after 30 days (n=1), benzyl label<br><b>DCVA</b> , max. 5.4% after 15 days (n=1), cyclopropane label<br>The formation of trans isomers (trans-cypermethrin and trans-DCVA) from cis-cypermethrin is not observed. |
| Mineralisation at study end                                                                                                 | 1.9-6.2% after 15-30 days, benzyl-label (n=2)<br>5.4% after 15 days, cyclopropane-label (n=1)                                                                                                                                               |
| Non-extractable residues at study end                                                                                       | 10.8-13.3% after 15-30 days, benzyl-label (n=2)<br>15.0% after 15 days, cyclopropane-label (n=1)                                                                                                                                            |



**Rate of degradation in soil (aerobic) laboratory studies active substance (Regulation (EU) N° 283/2013, Annex Part A, point 7.1.2.1.1 and Regulation (EU) N° 284/2013, Annex Part A, point 9.1.1.1)**

Trigger endpoints

| Soil type                            | Estimated kinetic parameters                                                                                                                 | pH <sup>a)</sup>         | t. °C / % MWHC | DT <sub>50</sub> /DT <sub>90</sub> (d) | DT <sub>50</sub> (d)<br>20 °C<br>pF2/10kPa <sup>b)</sup> | St. (χ <sup>2</sup> ) | Method of calculation |
|--------------------------------------|----------------------------------------------------------------------------------------------------------------------------------------------|--------------------------|----------------|----------------------------------------|----------------------------------------------------------|-----------------------|-----------------------|
| Alpha-cypermethrin                   | Dark aerobic conditions<br>No general trends can be drawn about the rate of degradation of specific isomers (R and S) of alpha-cypermethrin. |                          |                |                                        |                                                          |                       |                       |
| Ipswich Sandy loam <sup>d)</sup>     | k1: 0.08<br>k2: 0.009<br>g: 0.24                                                                                                             | 6.5 (KCl)                | 10°/50% MWHC   | 48.1 / 228.7                           | -                                                        | 1.8                   | DFOP                  |
| Ipswich Sandy loam <sup>d)</sup>     | α: 2.6<br>β: 60.4                                                                                                                            | 6.5 (KCl)                | 20°/50% MWHC   | 18.3 / 84.8                            | -                                                        | 3.5                   | FOMC                  |
| LUFA 5M Sandy loam <sup>e)</sup>     | α: 0.8034<br>β: 2.7562                                                                                                                       | 7.2 (CaCl <sub>2</sub> ) | 20°/50% MWHC   | 3.8 / 45.7                             | -                                                        | 11.2                  | FOMC                  |
| Li10 Loamy sand <sup>d)</sup>        | k1: 0.08<br>k2: 0.008<br>g: 0.4                                                                                                              | 6.1 (CaCl <sub>2</sub> ) | 20°/40% MWHC   | 28.3 / 196.3                           | -                                                        | 1.3                   | DFOP                  |
| LUFA 2.2 Loamy sand <sup>c)</sup>    | k1: 0.06<br>k2: 0.004<br>g: 0.50                                                                                                             | 5.4 (CaCl <sub>2</sub> ) | 20°/45% MWHC   | 35.0 / 329.4                           | -                                                        | 1.7                   | DFOP                  |
| LUFA 2.3 Sandy loam <sup>c)</sup>    | α: 1.77<br>β: 50.5                                                                                                                           | 5.9 (CaCl <sub>2</sub> ) | 20°/50% MWHC   | 24.3 / 134.6                           | -                                                        | 1.2                   | FOMC                  |
| Geometric mean (if not pH dependent) |                                                                                                                                              |                          |                |                                        | -                                                        |                       | -                     |
| pH dependence                        |                                                                                                                                              |                          |                |                                        | no                                                       |                       |                       |

<sup>a)</sup> Measured in calcium chloride solution

<sup>b)</sup> Normalised using a Q10 of 2.58 and Walker equation coefficient of 0.7

<sup>c)</sup> Cyclopropyl label

<sup>d)</sup> Benzyl label

<sup>e)</sup> Benzyl labelled and cyclopropane labelled samples are considered as true replicates for kinetic analysis

## Modelling endpoints

| Alpha-cypermethrin                   | Dark aerobic conditions          |                          |                |                      |                                                          |                       |                       |
|--------------------------------------|----------------------------------|--------------------------|----------------|----------------------|----------------------------------------------------------|-----------------------|-----------------------|
| Soil type                            | Estimated kinetic parameters     | pH <sup>a)</sup>         | t. °C / % MWHC | DT <sub>50</sub> (d) | DT <sub>50</sub> (d)<br>20 °C<br>pF2/10kPa <sup>b)</sup> | St. (χ <sup>2</sup> ) | Method of calculation |
| Ipswich Sandy loam <sup>d)</sup>     | /                                | 6.5 (KCl)                | 10°/50% MWHC   | -                    | -                                                        | -                     | -                     |
| Ipswich Sandy loam <sup>d)</sup>     | α: 2.6<br>β: 60.4                | 6.5 (KCl)                | 20°/50% MWHC   | 25.5                 | 25.5                                                     | 3.5                   | FOMC (DT90/3.32)      |
| LUFA 5M Sandy loam <sup>e)</sup>     | α: 0.8034<br>β: 2.7562           | 7.2 (CaCl <sub>2</sub> ) | 20°/50% MWHC   | 13.8                 | 10.3                                                     | 11.2                  | FOMC (DT90/3.32)      |
| Li10 Loamy sand <sup>d)</sup>        | k1: 0.08<br>k2: 0.008<br>g: 0.4  | 6.1 (CaCl <sub>2</sub> ) | 20°/40% MWHC   | 75.3                 | 75.3                                                     | 1.3                   | DFOP (ln2/k2)         |
| LUFA 2.2 Loamy sand <sup>c)</sup>    | k1: 0.06<br>k2: 0.004<br>g: 0.50 | 5.4 (CaCl <sub>2</sub> ) | 20°/45% MWHC   | 133.3                | 117.3                                                    | 1.7                   | DFOP (ln2/k2)         |
| LUFA 2.3 Sandy loam <sup>c)</sup>    | /                                | 5.9 (CaCl <sub>2</sub> ) | 20°/50% MWHC   | 29.4                 | 27.0                                                     | 4.9                   | SFO                   |
| Geometric mean (if not pH dependent) |                                  |                          |                |                      | <b>36.3</b>                                              |                       | -                     |
| pH dependence                        |                                  |                          |                | no                   |                                                          |                       |                       |

<sup>a)</sup> Measured in calcium chloride solution

<sup>b)</sup> Normalised using a Q10 of 2.58 and Walker equation coefficient of 0.7

<sup>c)</sup> Cyclopropyl label

<sup>d)</sup> Benzyl label

<sup>e)</sup> Benzyl labelled and cyclopropane labelled samples are considered as true replicates for kinetic analysis

**Rate of degradation in soil (aerobic) laboratory studies transformation products (Regulation (EU) N° 283/2013, Annex Part A, point 7.1.2.1.2 and Regulation (EU) N° 284/2013, Annex Part A, point 9.1.1.1)**

Trigger endpoints

| M310I017                             |   | Dark aerobic conditions - alpha-cypermethrin dosed studies |                   |                                           |                                          |                                                          |                          |                             |
|--------------------------------------|---|------------------------------------------------------------|-------------------|-------------------------------------------|------------------------------------------|----------------------------------------------------------|--------------------------|-----------------------------|
| Soil type                            |   | pH <sup>a)</sup>                                           | t. °C / %<br>MWHC | DT <sub>50</sub> /DT <sub>90</sub><br>(d) | f. f. k <sub>f</sub><br>/k <sub>dp</sub> | DT <sub>50</sub> (d)<br>20 °C<br>pF2/10kPa <sup>b)</sup> | St.<br>(χ <sup>2</sup> ) | Method of<br>calculation    |
| LUFA 5M<br>Sandy loam <sup>e)</sup>  | / | 7.2                                                        | 20°/50%<br>MWHC   | 10.8/36.0                                 | /                                        | -                                                        | 24.7                     | SFO (metabolite<br>decline) |
| Li10<br>Loamy sand <sup>d)</sup>     | / | 6.1                                                        | 20°/40%<br>MWHC   | 22.6/75.1                                 | /                                        | -                                                        | 13.5                     | DFOP-SFO                    |
| LUFA 2.2<br>Loamy sand <sup>c)</sup> | / | 5.4                                                        | 20°/45%<br>MWHC   | 42.3/140.4                                | /                                        | -                                                        | 13.2                     | DFOP-SFO                    |
| LUFA 2.3<br>Sandy loam <sup>c)</sup> | / | 5.9                                                        | 20°/50%<br>MWHC   | 4.9/16.2                                  | /                                        | -                                                        | 16.1                     | FOMC-SFO                    |
| Geometric mean (if not pH dependent) |   |                                                            |                   |                                           |                                          | -                                                        |                          |                             |
| Arithmetic mean                      |   |                                                            |                   |                                           | /                                        |                                                          |                          |                             |
| pH dependence                        |   |                                                            |                   |                                           |                                          | No                                                       |                          |                             |

<sup>a)</sup> Measured in calcium chloride solution

<sup>b)</sup> Normalised using a Q10 of 2.58 and Walker equation coefficient of 0.7

<sup>c)</sup> Cyclopropyl label

<sup>d)</sup> Benzyl label

<sup>e)</sup> Benzyl labelled and cyclopropyl labelled samples are considered as true replicates for kinetic analysis

## Modelling endpoints

| <b>M310I017</b>                      |   | Dark aerobic conditions – alpha-cypermethrin dosed from which the f.f. was derived was 0.344 |                   |                      |                                          |                                                          |                          |                             |
|--------------------------------------|---|----------------------------------------------------------------------------------------------|-------------------|----------------------|------------------------------------------|----------------------------------------------------------|--------------------------|-----------------------------|
| Soil type                            |   | pH <sup>a)</sup>                                                                             | t. °C / %<br>MWHC | DT <sub>50</sub> (d) | f. f. k <sub>f</sub><br>/k <sub>dp</sub> | DT <sub>50</sub> (d)<br>20 °C<br>pF2/10kPa <sup>b)</sup> | St.<br>(χ <sup>2</sup> ) | Method of<br>calculation    |
| LUFA 5M<br>Sandy loam <sup>e)</sup>  | / | 7.2                                                                                          | 20°/50%<br>MWHC   | 10.8                 | -                                        | 8.1 <sup>e)</sup>                                        | 24.9                     | SFO (metabolite<br>decline) |
| Li10<br>Loamy sand <sup>d)</sup>     | / | 6.1                                                                                          | 20°/40%<br>MWHC   | 22.6                 | 0.215                                    | 22.6                                                     | 13.5                     | DFOP-SFO                    |
| LUFA 2.2<br>Loamy sand <sup>c)</sup> | / | 5.4                                                                                          | 20°/45%<br>MWHC   | 42.3                 | 0.188                                    | 37.2                                                     | 13.2                     | DFOP-SFO                    |
| LUFA 2.3<br>Sandy loam <sup>c)</sup> | / | 5.9                                                                                          | 20°/50%<br>MWHC   | 3.1                  | 0.629                                    | 2.8                                                      | 15.5                     | SFO-SFO                     |
| Geometric mean (if not pH dependent) |   |                                                                                              |                   |                      |                                          | <b>11.8</b>                                              |                          |                             |
| Arithmetic mean                      |   |                                                                                              |                   |                      | <b>0.344</b>                             |                                                          |                          |                             |
| pH dependence,                       |   |                                                                                              |                   |                      |                                          | No                                                       |                          |                             |

a) Measured in calcium chloride solution

b) Normalised using a Q10 of 2.58 and Walker equation coefficient of 0.7

c) Cyclopropyl label

d) Benzyl label

e) Benzyl labelled and cyclopropyl labelled samples are considered as true replicates for kinetic analysis

## Trigger and modelling endpoints

| (cis-)DCVA                             | Dark aerobic conditions - alpha-cypermethrin dosed studies and metabolite dosed studies |                  |                   |                                            |                                          |                                                          |                          |                             |
|----------------------------------------|-----------------------------------------------------------------------------------------|------------------|-------------------|--------------------------------------------|------------------------------------------|----------------------------------------------------------|--------------------------|-----------------------------|
| Soil type                              |                                                                                         | pH <sup>a)</sup> | t. °C / %<br>MWHC | DT <sub>50</sub> / DT <sub>90</sub><br>(d) | f. f. k <sub>f</sub><br>/k <sub>dp</sub> | DT <sub>50</sub> (d)<br>20 °C<br>pF2/10kPa <sup>b)</sup> | St.<br>(χ <sup>2</sup> ) | Method of<br>calculation    |
| LUFA 5M<br>Sandy loam <sup>c) 1)</sup> | /                                                                                       | 7.2              | 20°/50%<br>MWHC   | 5.2/17.1                                   | -                                        | 3.9                                                      | 7.6                      | SFO (metabolite<br>decline) |
| Li10 <sup>2)</sup>                     | /                                                                                       | 6.0              | 20°/40%<br>MWHC   | 13.5/45.0                                  | -                                        | 13.4                                                     | 12.2                     | SFO                         |
| LUFA 2.2 <sup>2)</sup>                 | /                                                                                       | 6.4              | 20°/40%<br>MWHC   | 4.7/15.7                                   | -                                        | 3.9                                                      | 4.1                      | SFO                         |
| LUFA 5M <sup>2)</sup>                  | /                                                                                       | 6.9              | 20°/40%<br>MWHC   | 11.1/36.8                                  | -                                        | 7.7                                                      | 12.5                     | SFO                         |
| LUFA 2.2 <sup>3)</sup><br>Loamy Sand   | /                                                                                       | 5.8              | 20°/45%<br>MWHC   | 3.4/10                                     | -                                        | 3.4                                                      | -                        | SFO                         |
| LUFA 3A –<br>Loam <sup>3)</sup>        | /                                                                                       | 7.1              | 20°/45%<br>MWHC   | 2.7/10                                     | -                                        | 2.4                                                      | -                        | SFO                         |
| PTRL - Clay<br>loam <sup>3)</sup>      | /                                                                                       | 6.8              | 20°/45%<br>MWHC   | 8/27                                       | -                                        | 6.9                                                      | -                        | SFO                         |
| Geometric mean (if not pH dependent)   |                                                                                         |                  |                   |                                            |                                          | <b>5.1</b>                                               |                          |                             |
| Arithmetic mean                        |                                                                                         |                  |                   |                                            | -                                        |                                                          |                          |                             |
| pH dependence                          |                                                                                         |                  |                   |                                            |                                          | No                                                       |                          |                             |

<sup>a)</sup> Measured in calcium chloride solution

<sup>b)</sup> Normalised using a Q10 of 2.58 and Walker equation coefficient of 0.7

<sup>c)</sup> Cyclopropyl label

<sup>1)</sup> cis-DCVA in Michel and Hassink, 2014a (study submitted for the renewal on alpha-cypermethrin, Doc. No. 2014/1000641)

<sup>2)</sup> cis-DCVA in Sacchi, 2015b (metabolite-dosed study, study submitted for the renewal on alpha-cypermethrin, Doc. No. 2015/3003982)

<sup>3)</sup> cis-DCVA in Class and Dorn, 2003 (metabolite-dosed study, accepted in the EFSA conclusion regarding the peer review of the pesticide risk assessment of the active substance zeta-cypermethrin. EFSA Scientific Report (2008) 196, 1-119; DOI: 10.2903/j.efsa.2009.196r).

## Trigger and modelling endpoints

| 3-PBA                                   |   | Dark aerobic conditions - metabolite dosed studies |                   |                                            |                                          |                                                          |                     |                                                        |
|-----------------------------------------|---|----------------------------------------------------|-------------------|--------------------------------------------|------------------------------------------|----------------------------------------------------------|---------------------|--------------------------------------------------------|
| Soil type                               |   | pH <sup>a)</sup>                                   | t. °C / %<br>MWHC | DT <sub>50</sub> / DT <sub>90</sub><br>(d) | f. f. k <sub>f</sub><br>/k <sub>dp</sub> | DT <sub>50</sub> (d)<br>20 °C<br>pF2/10kPa <sup>b)</sup> | St.<br>( $\chi^2$ ) | Method of<br>calculation                               |
| Li10 <sup>1)</sup>                      | / | 6.2                                                | 20°/40%<br>MWHC   | 0.8/4.3                                    | -                                        | 1.3                                                      | 1.9                 | FOMC<br>(DT90/3.32)<br>$\alpha$ : 1.91; $\beta$ : 1.83 |
| LUFA 2.2 <sup>1)</sup>                  | / | 5.3                                                | 20°/40%<br>MWHC   | 0.3/2.6                                    | -                                        | 0.6                                                      | 3.0                 | FOMC<br>(DT90/3.32)<br>$\alpha$ : 1.05; $\beta$ : 0.33 |
| LUFA 5M <sup>1)</sup>                   | / | 7.4                                                | 20°/40%<br>MWHC   | 1.7/5.5                                    | -                                        | 1.2                                                      | 2.0                 | SFO                                                    |
| LUFA 2.2<br>Loamy Sand <sup>2)</sup>    | / | 5.8                                                | 20°/45%<br>MWHC   | 0.8/3.0                                    | -                                        | 7 (slow<br>phase)                                        | -                   | bi-phasic                                              |
| LUFA 3A –<br>Loam <sup>2)</sup>         | / | 7.1                                                | 20°/45%<br>MWHC   | 1.7/7.0                                    | -                                        | 2.7 (slow<br>phase)                                      | -                   | bi-phasic                                              |
| PTRL - Clay<br>loam <sup>2)</sup>       | / | 6.8                                                | 20°/45%<br>MWHC   | 5.0/16                                     | -                                        | 4.3                                                      | -                   | SFO                                                    |
| Speyer 2.2,<br>Loamy sand <sup>3)</sup> | / | 5.5                                                | 20°/50%<br>MWHC   | 0.38/1.3                                   | -                                        | 0.38                                                     | 4.7                 | SFO                                                    |
| Speyer 2.3,<br>Sandy loam <sup>3)</sup> | / | 6.6                                                | 20°/50%<br>MWHC   | 0.8/2.8                                    | -                                        | 0.79                                                     | 3.9                 | SFO                                                    |
| Speyer 6S,<br>Clay <sup>3)</sup>        | / | 7.2                                                | 20°/50%<br>MWHC   | 2.1/7                                      | -                                        | 1.13                                                     | 1.8                 | SFO                                                    |
| Geometric mean (if not pH dependent)    |   |                                                    |                   |                                            |                                          | <b>1.7</b>                                               |                     |                                                        |
| Arithmetic mean                         |   |                                                    |                   |                                            | -                                        |                                                          |                     |                                                        |
| pH dependence                           |   |                                                    |                   |                                            |                                          | No                                                       |                     |                                                        |

<sup>a)</sup> Measured in calcium chloride solution

<sup>b)</sup> Normalised using a Q10 of 2.58 and Walker equation coefficient of 0.7

<sup>1)</sup> Sacchi, 2015a (metabolite-dosed study, study submitted for the renewal on alpha-cypermethrin, Doc. No. 2015/3003981)

<sup>2)</sup> Class and Dorn, 2003 (metabolite-dosed study, accepted in the EFSA conclusion regarding the peer review of the pesticide risk assessment of the active substance zeta-cypermethrin. EFSA Scientific Report (2008) 196, 1-119; DOI: 10.2903/j.efsa.2009.196r).

<sup>3)</sup> Shepler, 2011 (metabolite-dosed study, accepted in EFSA conclusion regarding the peer review of the pesticide risk assessment of the active substance gamma-cyhalotrin. EFSA Journal (2014) 12,(2):3560, 93 pp; DOI: 10.2903/j.efsa.2014.3560)

**Rate of degradation field soil dissipation studies (Regulation (EU) N° 283/2013, Annex Part A, point 7.1.2.2.1 and Regulation (EU) N° 284/2013, Annex Part A, point 9.1.1.2.1)**

| Alpha-cypermethrin                   | Aerobic conditions                                     |                                  |                   |            |                             |                             |                  |                                           |                                                            |
|--------------------------------------|--------------------------------------------------------|----------------------------------|-------------------|------------|-----------------------------|-----------------------------|------------------|-------------------------------------------|------------------------------------------------------------|
|                                      | Soil type (indicate if bare or cropped soil was used). | Location (country or USA state). | pH                | Depth (cm) | DT <sub>50</sub> (d) actual | DT <sub>90</sub> (d) actual | St. ( $\chi^2$ ) | DT <sub>50</sub> (d) Norm <sup>b)</sup> . | Method of calculation                                      |
| Dollern, sandy loam                  | Germany (DE1)                                          |                                  | 5.5 <sup>a)</sup> | 0-90       | 46.1                        | 153                         | 11.0             | 46.1                                      | SFO                                                        |
| Ölbronn-Dürren, silt loam            | Germany (DE2)                                          |                                  | 5.4 <sup>a)</sup> | 0-90       | 12.9                        | 43.0                        | 12.5             | 12.9                                      | SFO                                                        |
| Melbourne, loam                      | United Kingdom (UK)                                    |                                  | 6.3 <sup>a)</sup> | 0-90       | 14.7                        | 250.5                       | 15.3             | 114.1                                     | HS<br>(ln2/k2)<br>k1: 0.0472<br>k2: 0.0061<br>tb: 19.0     |
| Letniza, silty clay loam             | Bulgaria (BG)                                          |                                  | 6.9 <sup>a)</sup> | 0-90       | 24.6                        | 81.8                        | 13.1             | 24.6                                      | SFO                                                        |
| Almansa, sandy loam                  | Spain (ES)                                             |                                  | 7.6 <sup>a)</sup> | 0-90       | 42.8                        | 142.3                       | 4.4              | 42.8                                      | SFO                                                        |
| Barry d'Islemade, sandy clay loam    | France (FR)                                            |                                  | 5.0 <sup>a)</sup> | 0-90       | 8.0                         | 38.7                        | 3.5              | 11.7                                      | FOMC<br>(DT90/3.32)<br>$\alpha$ : 2.3814<br>$\beta$ : 23.8 |
| Silt loam                            | Louisiana (USA)                                        |                                  | 6.2 <sup>b)</sup> | 0-91       | 5.9                         | 19.6                        | 33.8             | -                                         | SFO                                                        |
| Sandy loam                           | Oklahoma (USA)                                         |                                  | 6.7 <sup>b)</sup> | 0-91       | 6.3                         | 20.9                        | 6.3              | -                                         | SFO                                                        |
| Sand                                 | New York (USA)                                         |                                  | 7.1 <sup>b)</sup> | 0-91       | 3.4                         | 27.9                        | 13.5             | -                                         | FOMC<br>$\alpha$ = 1.0718<br>$\beta$ = 3.6844              |
| Sandy loam                           | California (USA)                                       |                                  | 6.8 <sup>b)</sup> | 0-91       | 4.0                         | 13.4                        | 8.4              | -                                         | SFO                                                        |
| Geometric mean (if not pH dependent) |                                                        |                                  |                   |            |                             |                             |                  | 30.7                                      |                                                            |
| pH dependence                        |                                                        |                                  |                   |            | No                          |                             |                  |                                           |                                                            |

<sup>a)</sup> Measured in water

<sup>b)</sup> Normalised using a Q10 of 2.58 and Walker equation coefficient of 0.7, values are DegT50matrix

<sup>c)</sup> Measured in CaCl<sub>2</sub> in upper 15 cm

\* The experts agreed at the Pesticides Peer Review Meeting 172 (Environmental Fate and Behaviour, 12 April 2018) that, based on the available similarity assessment, the US field studies can be considered representative for EU conditions.

| <b>(cis-)DCVA</b>                    |               | Aerobic conditions alpha-cypermethrin dosed from which the f.f. was derived was 0.371 |                  |            |                             |                             |                  |                                         |                      |                       |
|--------------------------------------|---------------|---------------------------------------------------------------------------------------|------------------|------------|-----------------------------|-----------------------------|------------------|-----------------------------------------|----------------------|-----------------------|
| Soil type                            | Location      | $X^{\delta}$                                                                          | pH <sup>a)</sup> | Depth (cm) | DT <sub>50</sub> (d) actual | DT <sub>90</sub> (d) actual | St. ( $\chi^2$ ) | DT <sub>50</sub> (d) Norm <sup>b)</sup> | f. f. $k_f / k_{dp}$ | Method of calculation |
| Letniza, silty clay loam             | Bulgaria (BG) |                                                                                       | 6.9              | 0-90       | 16.0                        | 53.2                        | 34.3             | 16.0                                    | 0.371                | SFO-SFO               |
| Almansa, sandy loam                  | Spain (ES)    |                                                                                       | 7.6              | 0-90       | 32.4                        | 107.6                       | 34.5             | 32.4                                    | 0.326                | SFO-SFO               |
| Geometric mean (if not pH dependent) |               |                                                                                       |                  |            |                             |                             |                  | -                                       |                      |                       |
| Arithmetic mean                      |               |                                                                                       |                  |            |                             |                             |                  |                                         | -                    |                       |
| pH dependence, Yes or No             |               |                                                                                       |                  |            |                             | No                          |                  |                                         |                      |                       |

<sup>a)</sup> Measured in water

<sup>b)</sup> Normalised using a Q10 of 2.58 and Walker equation coefficient of 0.7 values are DegT50matrix

| <b>3-PBA</b>                         |               | Aerobic conditions alpha-cypermethrin dosed from which the f.f. was derived was 0.437 |                  |            |                             |                             |                  |                                         |                      |                       |
|--------------------------------------|---------------|---------------------------------------------------------------------------------------|------------------|------------|-----------------------------|-----------------------------|------------------|-----------------------------------------|----------------------|-----------------------|
| Soil type                            | Location      | $X^{\delta}$                                                                          | pH <sup>a)</sup> | Depth (cm) | DT <sub>50</sub> (d) actual | DT <sub>90</sub> (d) actual | St. ( $\chi^2$ ) | DT <sub>50</sub> (d) Norm <sup>b)</sup> | f. f. $k_f / k_{dp}$ | Method of calculation |
| Letniza, silty clay loam             | Bulgaria (BG) |                                                                                       | 6.9              | 0-90       | 17.1                        | 56.9                        | 25.5             | 17.1                                    | 0.364                | SFO-SFO               |
| Almansa, sandy loam                  | Spain (ES)    |                                                                                       | 7.6              | 0-90       | 35.8                        | 119.0                       | 25.4             | 35.8                                    | 0.437                | SFO-SFO               |
| Geometric mean (if not pH dependent) |               |                                                                                       |                  |            |                             |                             |                  | -                                       |                      |                       |
| Arithmetic mean                      |               |                                                                                       |                  |            |                             |                             |                  |                                         | -                    |                       |
| pH dependence, Yes or No             |               |                                                                                       |                  |            |                             | No                          |                  |                                         |                      |                       |

<sup>c)</sup> Measured in water

<sup>d)</sup> Normalised using a Q10 of 2.58 and Walker equation coefficient of 0.7 values are DegT50matrix



**Combined laboratory and field kinetic endpoints for modelling (when not from different populations)\***

Rate of degradation in soil active substance, normalised geometric mean (if not pH dependent)

 DT<sub>50</sub> of **33.1 days**

Rate of degradation in soil transformation products, normalised geometric mean (if not pH dependent)

-

-

 Kinetic formation fraction (f. f.  $k_f / k_{dp}$ ) of transformation products, arithmetic mean

-

-

\* Only relevant after implementation of the published EFSA guidance describing how to amalgamate laboratory and field endpoints.

**Soil accumulation (Regulation (EU) N° 283/2013, Annex Part A, point 7.1.2.2 and Regulation (EU) N° 284/2013, Annex Part A, point 9.1.1.2.2)**

Soil accumulation and plateau concentration

 No accumulation in EU field studies since DT<sub>90</sub><1 year

**Rate of degradation in soil (anaerobic) laboratory studies active substance (Regulation (EU) N° 283/2013, Annex Part A, point 7.1.2.1.3 and Regulation (EU) N° 284/2013, Annex Part A, point 9.1.1.1)**

| Alpha-cypermethrin                   | Dark anaerobic conditions |                  |                |                                         |                                          |                       |                       |
|--------------------------------------|---------------------------|------------------|----------------|-----------------------------------------|------------------------------------------|-----------------------|-----------------------|
| Soil type                            | X <sup>6</sup>            | pH <sup>a)</sup> | t. °C / % MWHC | DT <sub>50</sub> / DT <sub>90</sub> (d) | DT <sub>50</sub> (d) 20 °C <sup>b)</sup> | St. (χ <sup>2</sup> ) | Method of calculation |
| LUFA 5M, sandy loam <sup>c)</sup>    |                           | 7.9              | 20°            | 46.8/222                                | -                                        | 3.0                   | SFO                   |
| Geometric mean (if not pH dependent) |                           |                  |                |                                         | -                                        |                       |                       |

<sup>a)</sup> Measured in water

<sup>b)</sup> Normalised using a Q10 of 2.58

<sup>c)</sup> Benzyl labelled and cyclopropane labelled samples are considered as true replicates for kinetic analysis

**Rate of degradation in soil (anaerobic) laboratory studies transformation products (Regulation (EU) N° 283/2013, Annex Part A, point 7.1.2.1.4 and Regulation (EU) N° 284/2013, Annex Part A, point 9.1.1.1)**

| M310I017                              | Dark anaerobic conditions alpha cypermethrin dosed study |                  |                |                                         |                                        |                                          |                       |                           |
|---------------------------------------|----------------------------------------------------------|------------------|----------------|-----------------------------------------|----------------------------------------|------------------------------------------|-----------------------|---------------------------|
| Soil type                             | X <sup>10</sup>                                          | pH <sup>a)</sup> | t. °C / % MWHC | DT <sub>50</sub> / DT <sub>90</sub> (d) | f. f. k <sub>f</sub> / k <sub>dp</sub> | DT <sub>50</sub> (d) 20 °C <sup>b)</sup> | St. (χ <sup>2</sup> ) | Method of calculation     |
| LUFA 5M, sandy loam <sup>c)</sup>     | α = 1.99;<br>β = 71.87                                   | 7.9              | 20°            | 29.9/156.1                              | -                                      | 29.9                                     | 3.2                   | FOMC (metabolite decline) |
| Geometric mean (if not p;H dependent) |                                                          |                  |                |                                         |                                        | -                                        |                       |                           |
| Arithmetic mean                       |                                                          |                  |                |                                         | -                                      |                                          |                       |                           |

<sup>a)</sup> Measured in [medium to be stated, usually calcium chloride solution or water]

<sup>b)</sup> Normalised using a Q10 of 2.58

<sup>c)</sup> Benzyl labelled and cyclopropane labelled samples are considered as true replicates for kinetic analysis

<sup>6</sup> X This column is reserved for any other property that is considered to have a particular impact on the degradation rate. Column and this footnote may be removed if not used.

**Rate of degradation on soil (photolysis) laboratory active substance (Regulation (EU) N° 283/2013, Annex Part A, point 7.1.1.3)**

| Alpha-cypermethrin                | Soil photolysis                       |                  |                                              |                                                          |                  |
|-----------------------------------|---------------------------------------|------------------|----------------------------------------------|----------------------------------------------------------|------------------|
|                                   | Soil type                             | pH <sup>a)</sup> | t. °C / % MWHC                               | DT <sub>50</sub> / DT <sub>90</sub> (d) calculated at °N | St. ( $\chi^2$ ) |
| Speyer F3, sandy silty loam       | 7.3                                   | 22°/45.7% MWHC   | 34.1 / 113.3 at °N *                         | 5.5                                                      | SFO              |
| Lufa 5M, sandy loam <sup>b)</sup> | 7.9 <sup>c)</sup> / 8.0 <sup>d)</sup> | 22°/55% MWHC     | 26.9 / 89.2 at 49°N<br>103.6 / 343.4 at 35°N | 3.1                                                      | SFO              |

<sup>a)</sup> Measured in water

<sup>b)</sup> Benzyl labelled and cyclopropane labelled samples are considered as true replicates for kinetic analysis

<sup>c)</sup> Benzyl labelled soil

<sup>d)</sup> Cyclopropane labelled soil

\* A data gap is identified for correcting the DT50 values in the study by van Dijk (1993) into days of natural summer sunlight at a latitude of 30-50°N.

**Soil adsorption active substance (Regulation (EU) N° 283/2013, Annex Part A, point 7.1.3.1.1 and Regulation (EU) N° 284/2013, Annex Part A, point 9.1.2.1)**

| Alpha-cypermethrin                    |      |                       |                          |                            |                          |                            |     |
|---------------------------------------|------|-----------------------|--------------------------|----------------------------|--------------------------|----------------------------|-----|
| Soil Type                             | OC % | Soil pH <sup>a)</sup> | K <sub>d</sub><br>(mL/g) | K <sub>doc</sub><br>(mL/g) | K <sub>F</sub><br>(mL/g) | K <sub>Foc</sub><br>(mL/g) | 1/n |
| Lufa 2.3                              | 0.67 | 5.4                   | 2366                     | 353100                     | -                        | -                          | -   |
| Lufa 2.2                              | 1.72 | 5.8                   | 4362                     | 253632                     | -                        | -                          | -   |
| Bruch West                            | 1.62 | 7.1                   | 3704                     | 228622                     | -                        | -                          | -   |
| Li10                                  | 0.95 | 6.3                   | 3181                     | 334804                     | -                        | -                          | -   |
| Fiorentino Poggio Renatico 1          | 1.07 | 7.4                   | 2927                     | 273519                     | -                        | -                          | -   |
| Geometric mean (if not pH dependent)* |      |                       |                          |                            |                          | 284839                     | -   |
| Arithmetic mean (if not pH dependent) |      |                       |                          |                            |                          | -                          | -   |
| pH dependence                         |      |                       | No                       |                            |                          |                            |     |

<sup>a)</sup> Measured in calcium chloride solution

\* Only relevant after implementation of the published EFSA guidance. During the Pesticides Peer Review Meeting 172 (Environmental Fate and Behaviour, 12 April 2018), the experts agreed to use the geometric mean K<sub>Foc</sub> value for PEC<sub>gw</sub>, PEC<sub>sw</sub> and PEC<sub>sed</sub> modelling.

**Soil adsorption transformation products (Regulation (EU) N° 283/2013, Annex Part A, point 7.1.3.1.2 and Regulation (EU) N° 284/2013, Annex Part A, point 9.1.2.1)**

| <b>3-PBA</b>                                                                                   |      |                              |                            |                       |                         |                       |                         |             |
|------------------------------------------------------------------------------------------------|------|------------------------------|----------------------------|-----------------------|-------------------------|-----------------------|-------------------------|-------------|
| Soil Type                                                                                      | OC % | Soil pH (CaCl <sub>2</sub> ) | Soil pH (H <sub>2</sub> O) | K <sub>d</sub> (mL/g) | K <sub>doc</sub> (mL/g) | K <sub>F</sub> (mL/g) | K <sub>Foc</sub> (mL/g) | 1/n         |
| Engelstadt/Benz, silt loam <sup>1)</sup>                                                       | 2.27 | 7.4                          | 7.9 <sup>a)</sup>          | 1.823                 | 80.3                    | 1.038                 | 46                      | 0.7466      |
| Ingelheim/Moers, sandy loam <sup>1)</sup>                                                      | 1.33 | 7.6                          | 8.1 <sup>a)</sup>          | 1.308                 | 98.3                    | 0.897                 | 67                      | 0.8165      |
| Schwabenheim, silt loam <sup>1)</sup>                                                          | 1.09 | 5.9                          | 6.5 <sup>a)</sup>          | 1.927                 | 176.8                   | 0.949                 | 87                      | 0.7043      |
| Speyer 2.2, loamy sand <sup>1)</sup>                                                           | 2.29 | 5.9                          | 6.5 <sup>a)</sup>          | 2.925                 | 127.7                   | 2.076                 | 91                      | 0.8608      |
| LUFA 2.3, sandy loam <sup>2)</sup>                                                             | 0.98 | 6.4                          | 6.9 <sup>a)</sup>          | -                     | -                       | 0.88                  | 90.1                    | 0.84        |
| LUFA 6S, clay <sup>2)</sup>                                                                    | 1.75 | 7.2                          | 7.7 <sup>a)</sup>          | -                     | -                       | 1.06                  | 60.5                    | 0.88        |
| Fraunhofer 02-A, silt loam <sup>2)</sup>                                                       | 1.30 | -                            | 6.6 <sup>b)</sup>          | -                     | -                       | 0.76                  | 58.8                    | 0.88        |
| Drummer, silt clay <sup>3)</sup>                                                               | 2.56 | -                            | 6.4 <sup>c)</sup>          | -                     | -                       | 3.11                  | 122                     | 0.66        |
| Thurston, sandy loam <sup>3)</sup>                                                             | 0.83 | -                            | 6.8 <sup>c)</sup>          | -                     | -                       | 0.98                  | 118                     | 0.65        |
| Nixon, sandy loam <sup>3)</sup>                                                                | 1.14 | -                            | 5.6 <sup>c)</sup>          | -                     | -                       | 2.44                  | 215                     | 0.67        |
| Speyer 2.2, Loamy sand <sup>4)</sup>                                                           | 2.1  | 5.5                          | 6.1 <sup>a)</sup>          | -                     | -                       | -                     | 58                      | 0.914       |
| Speyer 2.3, Sandy loam <sup>4)</sup>                                                           | 1.0  | 6.6                          | 7.1 <sup>a)</sup>          | -                     | -                       | -                     | 71                      | 0.864       |
| Speyer 6S, Clay <sup>4)</sup>                                                                  | 1.7  | 7.2                          | 7.7 <sup>a)</sup>          | -                     | -                       | -                     | 47                      | 0.865       |
| Geometric mean (n = 12, considering only soils with pH-H <sub>2</sub> O > 5.6) <sup>d) *</sup> |      |                              |                            |                       |                         |                       | <b>72.7</b>             | -           |
| Arithmetic mean (n = 12, considering only soils with pH-H <sub>2</sub> O > 5.6) <sup>d)</sup>  |      |                              |                            |                       |                         |                       | -                       | <b>0.81</b> |
| pH dependence                                                                                  |      |                              |                            | Yes <sup>e)</sup>     |                         |                       |                         |             |

<sup>a)</sup> Recalculated to pH-H<sub>2</sub>O using the equation  $\text{pH-H}_2\text{O} = 0.953 \text{ pH-CaCl}_2 + 0.85$  as presented in the Final Report of the FOCUS Ground Water Work Group (Sanco/13144/2010, version 3, 10 October 2014)

<sup>b)</sup> Measured in H<sub>2</sub>O

<sup>c)</sup> pH assumed to be measured in water, although not explicitly stated in the DAR on zeta-cypermethrin (May 2008)

<sup>d)</sup> Excluding the soil with pH 5.6 from the dataset would result in conservative mean adsorption values to be used for PEC<sub>gw</sub>, PEC<sub>sw</sub> and PEC<sub>sed</sub> modelling, as this acid soils is the soil within the dataset with the highest K<sub>foc</sub> values.

<sup>e)</sup> pH dependency of K<sub>foc</sub> was tested with the Kendall's tau test and a significant correlation was found (at a significance level of 0.05) for the whole dataset (n=13). No significant pH-dependency (at a significance level of 0.05) is observed when excluding the sandy loam soil with pH 5.6 and the highest K<sub>foc</sub> value of 215 mL/g from the dataset.

\* Only relevant after implementation of the published EFSA guidance. During the Pesticides Peer Review Meeting 172 (Environmental Fate and Behaviour, 12 April 2018), the experts agreed to use the geometric mean K<sub>Foc</sub> value for PEC<sub>gw</sub>, PEC<sub>sw</sub> and PEC<sub>sed</sub> modelling.

<sup>1)</sup> Holman 2002 (study submitted for the renewal on alpha-cypermethrin)

<sup>2)</sup> Hein, 2009 (accepted in the EFSA conclusion on the peer review of the pesticide risk assessment of the active substance beta-cypermethrin. EFSA Journal 2014;12(6):3717; DOI: 10.2903/j.efsa.2014.3717)

<sup>3)</sup> Gravelle, 1994 (accepted in the EFSA conclusion regarding the peer review of the pesticide risk assessment of the active substance zeta-cypermethrin. EFSA Scientific Report (2008) 196, 1-119; DOI: 10.2903/j.efsa.2009.196r)

<sup>4)</sup> LaMar and Quistad, 2010 (accepted in EFSA conclusion regarding the peer review of the pesticide risk assessment of the active substance gamma-cyhalotrin. EFSA Journal (2014) 12,(2):3560, 93 pp; DOI: 10.2903/j.efsa.2014.3560)

| <b>Cis-DCVA</b>                                                              |      |                       |                          |                            |                          |                            |             |
|------------------------------------------------------------------------------|------|-----------------------|--------------------------|----------------------------|--------------------------|----------------------------|-------------|
| Soil Type                                                                    | OC % | Soil pH <sup>a)</sup> | K <sub>d</sub><br>(mL/g) | K <sub>doc</sub><br>(mL/g) | K <sub>F</sub><br>(mL/g) | K <sub>Foc</sub><br>(mL/g) | 1/n         |
| Bonnut, sandy loam <sup>1)</sup>                                             | 0.9  | 5.5                   | -                        | -                          | 1.718                    | 191                        | 0.836       |
| Chateauroux, silt loam <sup>1)</sup>                                         | 1.3  | 6.5                   | -                        | -                          | 0.743                    | 57                         | 0.692       |
| Thoree les pins, sandy loam <sup>1)</sup>                                    | 0.7  | 4.4                   | -                        | -                          | 2.223                    | 318                        | 0.889       |
| Pithiviers, clay loam <sup>1)</sup>                                          | 1.4  | 7.1                   | -                        | -                          | 0.514                    | 37                         | 0.754       |
| Ploudalmezeau, clay silt <sup>1)</sup>                                       | 1.5  | 6.4                   | -                        | -                          | 0.711                    | 47                         | 0.728       |
| Geometric mean (n = 3, considering only soils with pH > 5.5) <sup>b) *</sup> |      |                       |                          |                            |                          | <b>46.3</b>                | -           |
| Arithmetic mean (n = 3, considering only soils with pH > 5.5) <sup>b)</sup>  |      |                       |                          |                            |                          | -                          | <b>0.72</b> |
| pH dependence                                                                |      |                       |                          | Yes                        |                          |                            |             |

<sup>a)</sup> Measured in calcium chloride solution

<sup>b)</sup> Excluding the soils with pH of 5.5 and 4.4 from the dataset would result in conservative mean adsorption values to be used for PEC<sub>gw</sub>, PEC<sub>sw</sub> and PEC<sub>sed</sub> modelling, as these acid soils are the soils within the dataset with the highest K<sub>foc</sub> values.

\* Only relevant after implementation of the published EFSA guidance. During the Pesticides Peer Review Meeting 172 (Environmental Fate and Behaviour, 12 April 2018), the experts agreed to use the geometric mean K<sub>Foc</sub> value for PEC<sub>gw</sub>, PEC<sub>sw</sub> and PEC<sub>sed</sub> modelling.

<sup>1)</sup> cis-DCVA in Malinsky, 2005 (study submitted for the renewal on alpha-cypermethrin)

| <b>M310I017</b>                       |      |                       |                          |                            |                          |                            |     |
|---------------------------------------|------|-----------------------|--------------------------|----------------------------|--------------------------|----------------------------|-----|
| Soil Type                             | OC % | Soil pH <sup>a)</sup> | K <sub>d</sub><br>(mL/g) | K <sub>doc</sub><br>(mL/g) | K <sub>F</sub><br>(mL/g) | K <sub>Foc</sub><br>(mL/g) | 1/n |
| Lufa 2.2, sandy loam                  | 1.72 | 5.8                   | 2393                     | 139148                     | -                        | -                          | -   |
| Lufa 2.3, loamy fine sand             | 0.67 | 5.4                   | 1738                     | 259437                     | -                        | -                          | -   |
| Bruch west, sandy loam                | 1.62 | 7.1                   | 2819                     | 174041                     | -                        | -                          | -   |
| Li10, loamy fine sand                 | 0.95 | 6.3                   | 2956                     | 311179                     | -                        | -                          | -   |
| Fiorentino Poggio Renatico 1, loam    | 1.07 | 7.4                   | 3914                     | 365806                     | -                        | -                          | -   |
| Geometric mean (if not pH dependent)* |      |                       |                          |                            |                          | <b>234901</b>              | -   |
| Arithmetic mean (if not pH dependent) |      |                       |                          |                            |                          | -                          | -   |
| pH dependence                         |      |                       |                          | No                         |                          |                            |     |

<sup>a)</sup> Measured in calcium chloride solution

\* Only relevant after implementation of the published EFSA guidance. During the Pesticides Peer Review Meeting 172 (Environmental Fate and Behaviour, 12 April 2018), the experts agreed to use the geometric mean K<sub>Foc</sub> value for PEC<sub>gw</sub>, PEC<sub>sw</sub> and PEC<sub>sed</sub> modelling.

**Mobility in soil column leaching active substance (Regulation (EU) N° 283/2013, Annex Part A, point 7.1.4.1.1 and Regulation (EU) N° 284/2013, Annex Part A, point 9.1.2.1)**

Column leaching

|                                                                       |
|-----------------------------------------------------------------------|
| Not required, sufficient information from adsorption/desorption study |
| -                                                                     |

**Mobility in soil column leaching transformation products (Regulation (EU) N° 283/2013, Annex Part A, point 7.1.4.1.2 and Regulation (EU) N° 284/2013, Annex Part A, point 9.1.2.1)**

Column leaching

|                                                                                                                  |
|------------------------------------------------------------------------------------------------------------------|
| (cypermethrin) No residue is found in the leachate (limit of determination 0.2 µg/l)                             |
| DCVA reached 20% AR in the leachates from the silty clay soil and 3-PBA was found in concentrations around 5-10% |

**Lysimeter / field leaching studies (Regulation (EU) N° 283/2013, Annex Part A, points 7.1.4.2 / 7.1.4.3 and Regulation (EU) N° 284/2013, Annex Part A, points 9.1.2.2 / 9.1.2.3)**

Lysimeter/ field leaching studies

|                                                                                                                  |
|------------------------------------------------------------------------------------------------------------------|
| Not required as information on mobility of the parent and its metabolites 3-PBA, DCVA and M310I017 is available. |
|------------------------------------------------------------------------------------------------------------------|

### Hydrolytic degradation (Regulation (EU) N° 283/2013, Annex Part A, point 7.2.1.1)

Hydrolytic degradation of the active substance and metabolites > 10 %

pH 4: hydrolytical stability (no degradation after 10 days) at 50°C

pH 4: hydrolytical stability (no degradation after 30 days) at 25°C

pH 5:

DT<sub>50</sub> of 60.4 days at 25°C (SFO)

pH 7:

DT<sub>50</sub> of 28.7 days at 50°C (SFO)

DT<sub>50</sub> of 5.7 days at 60°C (SFO)

DT<sub>50</sub> of 2.2 days at 75°C (SFO)

3-PBAld was detected in maximum amounts of 21.6% (50°C), 71.7% (60°C), and 61.5% (75°C).

pH 7:

DT<sub>50</sub> of 54.2 days at 25°C (SFO)

DT<sub>50</sub> of 85.3 days at 25°C (SFO)

pH 9:

DT<sub>50</sub> of 3.3 days at 25 °C (SFO)

DT<sub>50</sub> of 0.1 day at 50 °C (SFO)

3-PBAld was detected at maximum 88.4% (25°C) and 92.1% TAR (50°C) were measured. 3-PBAld occurred in increasing amount until these maximum values measured during the last sampling points, indicating some aqueous stability of this compound in water.

pH 9:

DT<sub>50</sub> of 4.5 days at 25°C (SFO)

DT<sub>50</sub> of 2.9 days at 50°C (SFO)



**Aqueous photochemical degradation (Regulation (EU) N° 283/2013, Annex Part A, points 7.2.1.2 / 7.2.1.3)**

Photolytic degradation of active substance and metabolites above 10 %

Based on 8.4 hours of artificial light irradiation (1 solar day), DT<sub>50</sub> and DT<sub>90</sub> values of alpha-cypermethrin were 6.3 and 20.9 days, (benzyl label), respectively, and 3.4 and 11.7 days (cyclopropane label), respectively.

Major photolysis products (> 10% of applied radioactivity) :

3-PBAldehyde (max. 12.9% after 4 d, 4.1% after 15 d) (Bz-label)

3-PBA (max. 22.5% after 4 d, 8.5% after 15 d) (Bz-label)

DCVA, combination of cis and trans isomers (max. 43.7% after 8 d, 34.8% after 28 d) (Cp-label)

CO<sub>2</sub> : 21.4% after 15 d (Bz-label), 7.7% after 28 d (Cp-label)

Quantum yield of direct phototransformation in water at λ > 290 nm

$8.12 \times 10^{-3} \text{ mol} \cdot \text{Einstein}^{-1}$

**'Ready biodegradability' (Regulation (EU) N° 283/2013, Annex Part A, point 7.2.2.1)**

Readily biodegradable (yes/no)

Not ready biodegradable

**Aerobic mineralisation in surface water (Regulation (EU) N° 283/2013, Annex Part A, point 7.2.2.2 and Regulation (EU) N° 284/2013, Annex Part A, point 9.2.1)**

| Alpha-cypermethrin                                         |                |                      |                     |                                                                         |                                  |                       |                                                         |                                   |                       |                       |
|------------------------------------------------------------|----------------|----------------------|---------------------|-------------------------------------------------------------------------|----------------------------------|-----------------------|---------------------------------------------------------|-----------------------------------|-----------------------|-----------------------|
| System identifier<br>(indicate fresh, estuarine or marine) | pH water phase | pH sed <sup>a)</sup> | t. °C <sup>b)</sup> | DT <sub>50</sub> /DT <sub>90</sub> whole sys. (suspended sediment test) |                                  | St. (χ <sup>2</sup> ) | DT <sub>50</sub> /DT <sub>90</sub> Water (pelagic test) |                                   | St. (χ <sup>2</sup> ) | Method of calculation |
|                                                            |                |                      |                     | At study temp                                                           | Normalised to x °C <sup>c)</sup> |                       | At study temp (20°C)                                    | Normalised to 12 °C <sup>c)</sup> |                       |                       |
| Fresh water, low concentration, cyclopropyl-label          | 7.9            | 7.6                  | 20°                 | -                                                                       | -                                | -                     | 3.1/43.0                                                | 6.6/91.8                          | 9.9                   | DFOP                  |
| Fresh water, low concentration, benzyl-label               | 7.9            | 7.6                  | 20°                 | -                                                                       | -                                | -                     | 2.3/86.8                                                | 4.9/185.3                         | 9.8                   | DFOP                  |
| Fresh water, high concentration, cyclopropyl-label         | 7.9            | 7.6                  | 20°                 | -                                                                       | -                                | -                     | 3.4/36.5                                                | 7.3/77.9                          | 9.5                   | DFOP                  |
| Fresh water, low concentration, benzyl-label               | 7.9            | 7.6                  | 20°                 | -                                                                       | -                                | -                     | 3.3/36.8                                                | 7.0/78.5                          | 6.5                   | DFOP                  |

<sup>a)</sup> Measured in water

<sup>b)</sup> Temperature of incubation=temperature that the environmental media was collected or std temperature of 20°C

<sup>c)</sup> Normalised using a Q10 of 2.58 to the temperature of the environmental media at the point of sampling.

| DCVA                                                       |                |                      |                     |                                                                         |                                  |                       |                                                         |                                  |                       |                       |
|------------------------------------------------------------|----------------|----------------------|---------------------|-------------------------------------------------------------------------|----------------------------------|-----------------------|---------------------------------------------------------|----------------------------------|-----------------------|-----------------------|
| Max in total system 77.7% (cis-DCVA) after 59 days         |                |                      |                     |                                                                         |                                  |                       |                                                         |                                  |                       |                       |
| System identifier<br>(indicate fresh, estuarine or marine) | pH water phase | pH sed <sup>a)</sup> | t. °C <sup>b)</sup> | DT <sub>50</sub> /DT <sub>90</sub> whole sys. (suspended sediment test) |                                  | St. (χ <sup>2</sup> ) | DT <sub>50</sub> /DT <sub>90</sub> Water (pelagic test) |                                  | St. (χ <sup>2</sup> ) | Method of calculation |
|                                                            |                |                      |                     | At study temp                                                           | Normalised to x °C <sup>c)</sup> |                       | At study temp                                           | Normalised to x °C <sup>c)</sup> |                       |                       |
| Fresh water, low concentration, cyclopropyl-label          | 7.9            | 7.6                  | 20°                 | -                                                                       | -                                | -                     | No reliable endpoints derived                           | -                                | -                     | -                     |
| Fresh water, high concentration, cyclopropyl-label         | 7.9            | 7.6                  | 20°                 | -                                                                       | -                                | -                     | No reliable endpoints derived                           | -                                | -                     | -                     |

<sup>a)</sup> Measured in water

<sup>b)</sup> Temperature of incubation=temperature that the environmental media was collected or std temperature of 20°C

<sup>c)</sup> Normalised using a Q10 of 2.58 to the temperature of the environmental media at the point of sampling. (note temp of x should be stated).

| 3-PBA                                                            |                      |                         |                        |                                                                               |                                         |                          |                                                               |                                            |                          |                          |
|------------------------------------------------------------------|----------------------|-------------------------|------------------------|-------------------------------------------------------------------------------|-----------------------------------------|--------------------------|---------------------------------------------------------------|--------------------------------------------|--------------------------|--------------------------|
| Max in total system 52.9% after 7 days                           |                      |                         |                        |                                                                               |                                         |                          |                                                               |                                            |                          |                          |
| System identifier<br>(indicate fresh,<br>estuarine or<br>marine) | pH<br>water<br>phase | pH<br>sed <sup>a)</sup> | t.<br>°C <sup>b)</sup> | DT <sub>50</sub> /DT <sub>90</sub> whole<br>sys. (suspended<br>sediment test) |                                         | St.<br>(χ <sup>2</sup> ) | DT <sub>50</sub> /DT <sub>90</sub><br>Water (pelagic<br>test) |                                            | St.<br>(χ <sup>2</sup> ) | Method of<br>calculation |
|                                                                  |                      |                         |                        | At study<br>temp                                                              | Normal<br>ised to<br>x °C <sup>c)</sup> |                          | At study<br>temp                                              | Norm<br>alised<br>to x<br>°C <sup>c)</sup> |                          |                          |
| Fresh water, low<br>concentration,<br>benzyl-label               | 7.9                  | 7.6                     | 20°                    | -                                                                             | -                                       | -                        | No reliable<br>endpoints<br>derived                           | -                                          | -                        | -                        |
| Fresh water, high<br>concentration,<br>benzyl-label              | 7.9                  | 7.6                     | 20°                    | -                                                                             | -                                       | -                        | 45.2/150.<br>2                                                | -                                          | 9.4                      | DFOP-SFO                 |

<sup>a)</sup> Measured in water

<sup>b)</sup> Temperature of incubation=temperature that the environmental media was collected or std temperature of 20°C

<sup>c)</sup> Normalised using a Q10 of 2.58 to the temperature of the environmental media at the point of sampling. (note temp of x should be stated).

| Mineralisation and non extractable residues (for parent dosed experiments) |                      |           |                                                         |                                                                                |                                                                                                   |
|----------------------------------------------------------------------------|----------------------|-----------|---------------------------------------------------------|--------------------------------------------------------------------------------|---------------------------------------------------------------------------------------------------|
| System identifier<br>(indicate fresh,<br>estuarine or<br>marine)           | pH<br>water<br>phase | pH<br>sed | Mineralisation<br>x % after n d. (end of<br>the study). | Non-extractable<br>residues. max x %<br>after n d (suspended<br>sediment test) | Non-extractable residues.<br>max x % after n d (end of<br>the study) (suspended<br>sediment test) |
| Fresh water, low<br>concentration,<br>cyclopropyl-label                    | 7.9                  | 7.6       | 4.9% after 59 days                                      | -                                                                              | -                                                                                                 |
| Fresh water, low<br>concentration,<br>benzyl-label                         | 7.9                  | 7.6       | 32.8% after 59 days                                     | -                                                                              | -                                                                                                 |
| Fresh water, high<br>concentration,<br>cyclopropyl-label                   | 7.9                  | 7.6       | 3.5% after 59 days                                      | -                                                                              | -                                                                                                 |
| Fresh water, low<br>concentration,<br>benzyl-label                         | 7.9                  | 7.6       | 37.6% after 59 days                                     | -                                                                              | -                                                                                                 |

**Water / sediment study (Regulation (EU) N° 283/2013, Annex Part A, point 7.2.2.3 and Regulation (EU) N° 284/2013, Annex Part A, point 9.2.2)**

## Trigger endpoints

| Alpha-cypermethrin               | Distribution : max in water 95.4% after 0 d. Max. sed 77.0% after 14 d<br>The enantioselective effect on degradation behaviour in water and sediment is small and has no influence on risk assessment. |                          |       |                                               |                       |                                          |                       |                                        |                       |                       |
|----------------------------------|--------------------------------------------------------------------------------------------------------------------------------------------------------------------------------------------------------|--------------------------|-------|-----------------------------------------------|-----------------------|------------------------------------------|-----------------------|----------------------------------------|-----------------------|-----------------------|
| Water / sediment system          | pH water phase                                                                                                                                                                                         | pH sed <sup>a)</sup>     | t. °C | DT <sub>50</sub> /DT <sub>90</sub> whole sys. | St. (χ <sup>2</sup> ) | DT <sub>50</sub> /DT <sub>90</sub> water | St. (χ <sup>2</sup> ) | DT <sub>50</sub> /DT <sub>90</sub> sed | St. (χ <sup>2</sup> ) | Method of calculation |
| System I (Rhine)                 | 8.2                                                                                                                                                                                                    | 7.8 (KCl)                | 20°   | 4.5 /261.6 (FOMC)                             | 7.8                   | 0.1 / 2.6 (HS)                           | 12.2                  | 14.8 / 826.0 (FOMC)                    | 4.6                   | /                     |
| System II (Judenweiher)          | 7.2                                                                                                                                                                                                    | 7.1 (KCl)                | 20°   | 4.6 /24.1 (FOMC)                              | 6.3                   | 0.2 / 5.1 (HS)                           | 7.3                   | 8.0 / 27.8 (HS)                        | 5.0                   | /                     |
| System III (Berghauser Altrhein) | 7.9                                                                                                                                                                                                    | 7.0 (CaCl <sub>2</sub> ) | 20°   | 13.5 /171.9 (DFOP)                            | 3.0                   | 0.3 / 8.5 (FOMC)                         | 12.6                  | 22.9 /229.3 (FOMC)                     | 5.4                   | /                     |
| System IV (Ranschgraben)         | 7.3                                                                                                                                                                                                    | 5.9 (CaCl <sub>2</sub> ) | 20°   | 51.3 /276.3 (DFOP)                            | 3.8                   | 0.2 / 6.6 (FOMC)                         | 14.2                  | 81.0 /269.1 (SFO)                      | 4.4                   | /                     |

<sup>a)</sup> Measured in [medium to be stated, usually calcium chloride solution or water]

## Modelling endpoints

| Alpha-cypermethrin                   |                |                          |       |                             |                       |                          |                       |                            |                       |                       |
|--------------------------------------|----------------|--------------------------|-------|-----------------------------|-----------------------|--------------------------|-----------------------|----------------------------|-----------------------|-----------------------|
| Water / sediment system              | pH water phase | pH sed <sup>a)</sup>     | t. °C | DT <sub>50</sub> whole sys. | St. (χ <sup>2</sup> ) | DT <sub>50</sub> water   | St. (χ <sup>2</sup> ) | DT <sub>50</sub> sed       | St. (χ <sup>2</sup> ) | Method of calculation |
| System I (Rhine)                     | 8.2            | 7.8 (KCl)                | 20°   | 56.4 <sup>c)</sup> (DFOP)   | 9.9                   | 0.5 <sup>d)</sup> (HS)   | 12.2                  | 248.8 <sup>d)</sup> (FOMC) | 4.6                   | /                     |
| System II (Judenweiher)              | 7.2            | 7.1 (KCl)                | 20°   | 5.4 (SFO)                   | 7.4                   | 1.5 <sup>d)</sup> (HS)   | 7.3                   | 8.2 (SFO)                  | 9.1                   | /                     |
| System III (Berghauser Altrhein)     | 7.9            | 7.0 (CaCl <sub>2</sub> ) | 20°   | 20.6 (SFO)                  | 11.6                  | 2.6 <sup>d)</sup> (FOMC) | 12.6                  | 33.6 (SFO)                 | 10.7                  | /                     |
| System IV (Ranschgraben)             | 7.3            | 5.9 (CaCl <sub>2</sub> ) | 20°   | 96.3 <sup>c)</sup> (DFOP)   | 3.8                   | 2.0 <sup>d)</sup> (FOMC) | 14.2                  | 81.0 (SFO)                 | 4.4                   | /                     |
| Geometric mean at 20°C <sup>b)</sup> |                |                          |       | 27.9                        |                       | 1.4                      |                       | 48.5                       |                       |                       |

<sup>a)</sup> Measured in [medium to be stated, usually calcium chloride solution or water]

<sup>b)</sup> Normalised using a Q10 of 2.58

<sup>c)</sup> Calculated as  $DT_{50} = \ln 2/k_2$

<sup>d)</sup> Calculated as  $DT_{50} = DT_{90}/3.32$

## Trigger endpoints

| <b>3-PBA</b>                     |                | Parent alpha-cypermethrin dosed studies, distribution (max in water 18% after 7 d. Max. sed 5.1% after 7 d). Max in total system 23.1% after 7 days, |       |                                               |                       |                                          |                       |                                        |                       |                       |
|----------------------------------|----------------|------------------------------------------------------------------------------------------------------------------------------------------------------|-------|-----------------------------------------------|-----------------------|------------------------------------------|-----------------------|----------------------------------------|-----------------------|-----------------------|
| Water / sediment system          | pH water phase | pH sed <sup>a)</sup>                                                                                                                                 | t. °C | DT <sub>50</sub> /DT <sub>90</sub> whole sys. | St. (χ <sup>2</sup> ) | DT <sub>50</sub> /DT <sub>90</sub> water | St. (χ <sup>2</sup> ) | DT <sub>50</sub> /DT <sub>90</sub> sed | St. (χ <sup>2</sup> ) | Method of calculation |
| Benzyl, System I (Rhine)         | 8.2            | 7.8 (KCl)                                                                                                                                            | 20°   | 8.5/28.2 (SFO)                                | 29.1                  | 9.2/30.6 (SFO)                           | 10.6                  | 16.7/55.3 (SFO)                        | 14.2                  | /                     |
| Benzyl, System II (Judenweiher)  | 7.2            | 7.1 (KCl)                                                                                                                                            | 20°   | 7.6/25.3 (SFO)                                | 26.8                  | 11.4/38.0 (SFO)                          | 20.4                  | 19.3/64.1 (SFO)                        | 11.8                  | /                     |
| System III (Berghauser Altrhein) | 7.9            | 7.0 (CaCl <sub>2</sub> )                                                                                                                             | 20°   | 6.2 / 91.4 (HS)                               | 3.8                   | 11.6 / 195.7 (HS)                        | 3.0                   | n.c.                                   | /                     | /                     |
| System IV (Ranschgraben)         | 7.3            | 5.9 (CaCl <sub>2</sub> )                                                                                                                             | 20°   | n.c.                                          | /                     | 3.8 / 58.3 (HS)                          | 11.5                  | n.c.                                   | /                     | /                     |

n.c. : not calculated due to either limited number of data points available (Berghauser Altrhein) or not observed in the sediment phase (Ranschgraben)

<sup>a)</sup> Measured in [medium to be stated, usually calcium chloride solution or water]

<sup>b)</sup> Normalised using a Q10 of 2.58

#### Modelling endpoints - Dissipation (for FOCUS Step 1-2)

| <b>3-PBA</b>                         |                | Parent alpha-cypermethrin dosed studies, distribution (max in water 18% after 7 d. Max. sed 5.1% after 7 d). Max in total system 23.1% after 7 days |       |                                                  |                       |                        |                       |                      |                       |                       |
|--------------------------------------|----------------|-----------------------------------------------------------------------------------------------------------------------------------------------------|-------|--------------------------------------------------|-----------------------|------------------------|-----------------------|----------------------|-----------------------|-----------------------|
| Water / sediment system              | pH water phase | pH sed <sup>a)</sup>                                                                                                                                | t. °C | DT <sub>50</sub> whole sys.                      | St. (χ <sup>2</sup> ) | DT <sub>50</sub> water | St. (χ <sup>2</sup> ) | DT <sub>50</sub> sed | St. (χ <sup>2</sup> ) | Method of calculation |
| Benzyl, System I (Rhine)             | 8.2            | 7.8 (KCl)                                                                                                                                           | 20°   | 10.2 (SFO)                                       | 11.2                  | 9.2 (SFO)              | 10.6                  | 16.7 (SFO)           | 14.2                  | /                     |
| Benzyl, System II (Judenweiher)      | 7.2            | 7.1 (KCl)                                                                                                                                           | 20°   | 12.5 (SFO)                                       | 18.0                  | 11.4 (SFO)             | 20.4                  | 19.3 (SFO)           | 11.8                  | /                     |
| System III (Berghauser Altrhein)     | 7.9            | 7.0 (CaCl <sub>2</sub> )                                                                                                                            | 20°   | 74.5 (HS)                                        | 3.8                   | 161.2 (HS)             | 3.0                   | n.c.                 | /                     | /                     |
| System IV (Ranschgraben)             | 7.3            | 5.9 (CaCl <sub>2</sub> )                                                                                                                            | 20°   | n.c.<br>(DT50 water used for geomean whole sys.) | /                     | 17.6 (HS)              | 11.5                  | n.c.                 | /                     | /                     |
| Geometric mean at 20°C <sup>b)</sup> |                |                                                                                                                                                     |       | 20.2                                             |                       | 23.4                   |                       | 18.1                 |                       |                       |

n.c. : not calculated due to either limited number of data points available (Berghauser Altrhein) or not observed in the sediment phase (Ranschgraben)

<sup>a)</sup> Measured in [medium to be stated, usually calcium chloride solution or water]

<sup>b)</sup> Normalised using a Q10 of 2.58

#### Modelling endpoints - Degradation (for FOCUS Step 3)

| 3-PBA                                |                | kinetic formation fraction ( $k_f/k_{dp}$ ): in total system, formation fraction of 0.493 from alpha-cypermethrin |       |                                                     |                  |                       |
|--------------------------------------|----------------|-------------------------------------------------------------------------------------------------------------------|-------|-----------------------------------------------------|------------------|-----------------------|
| Water / sediment system              | pH water phase | pH sed <sup>a)</sup>                                                                                              | t. °C | DegT <sub>50</sub> /DegT <sub>90</sub> whole system | St. ( $\chi^2$ ) | Method of calculation |
| Cyclopropyl, System I (Rhine)        | 8.2            | 7.8 (KCl)                                                                                                         | 20°   | 8.5<br>Ffm from parent:0.460                        | 29.1             | DFOP-SFO              |
| Cyclopropyl, System II (Judenweiher) | 7.2            | 7.1 (KCl)                                                                                                         | 20°   | 7.6<br>Ffm from parent:0.526                        | 26.8             | FOMC-SFO              |
| System III (Berghauser Altrhein)     | 7.9            | 7.0 (CaCl <sub>2</sub> )                                                                                          | 20°   | No reliable endpoints could be derived              | /                | /                     |
| System IV (Ranschgraben)             | 7.3            | 5.9 (CaCl <sub>2</sub> )                                                                                          | 20°   | No reliable endpoints could be derived              | /                | /                     |
| Geometric mean at 20°C <sup>b)</sup> |                |                                                                                                                   |       | 8.0                                                 |                  |                       |
| Arithmetic mean ffm                  |                |                                                                                                                   |       | 0.493                                               |                  |                       |

<sup>a)</sup> Measured in [medium to be stated, usually calcium chloride solution or water]

<sup>b)</sup> Normalised using a Q10 of 2.58

#### Trigger endpoints

| (cis-)DCVA                           |                | Parent alpha-cypermethrin dosed studies, distribution (max in water 47.3% after 14 d. Max. sed 19.5% after 14 d). Max in total system 66.8% after 14 days, |       |                                               |                  |                                          |                  |                                        |                  |                       |
|--------------------------------------|----------------|------------------------------------------------------------------------------------------------------------------------------------------------------------|-------|-----------------------------------------------|------------------|------------------------------------------|------------------|----------------------------------------|------------------|-----------------------|
| Water / sediment system              | pH water phase | pH sed <sup>a)</sup>                                                                                                                                       | t. °C | DT <sub>50</sub> /DT <sub>90</sub> whole sys. | St. ( $\chi^2$ ) | DT <sub>50</sub> /DT <sub>90</sub> water | St. ( $\chi^2$ ) | DT <sub>50</sub> /DT <sub>90</sub> sed | St. ( $\chi^2$ ) | Method of calculation |
| Cyclopropyl, System I (Rhine)        | 8.2            | 7.8 (KCl)                                                                                                                                                  | 20°   | 25.5/84.8 (SFO)                               | 28.0             | No reliable endpoints derived            | -                | 36.4/120.8 (SFO)                       | 12.7             | /                     |
| Cyclopropyl, System II (Judenweiher) | 7.2            | 7.1 (KCl)                                                                                                                                                  | 20°   | 30.3/100.8 (SFO)                              | 10.7             | 30.5/101.2 (SFO)                         | 14.7             | 50.4/167.4 (SFO)                       | 20.7             | /                     |
| System III (Berghauser Altrhein)     | 7.9            | 7.0 (CaCl <sub>2</sub> )                                                                                                                                   | 20°   | 5.9 / 25.5 (DFOP)                             | 0.3              | 6.6 / 30.0 (DFOP)                        | 0.4              | n.c.                                   | /                | /                     |
| System IV (Ranschgraben)             | 7.3            | 5.9 (CaCl <sub>2</sub> )                                                                                                                                   | 20°   | n.c.                                          | /                | 12.3 / 40.8 (SFO)                        | 15.9             | n.c.                                   | /                | /                     |

n.c. : not calculated due to either limited number of data points available (Berghauser Altrhein) or not observed in the sediment phase (Ranschgraben)

<sup>a)</sup> Measured in [medium to be stated, usually calcium chloride solution or water]

## Modelling endpoints - Dissipation (for FOCUS Step 1-2)

| (cis-)DCVA                           | Parent alpha-cypermethrin dosed studies, distribution (max in water 47.3% after 14 d. Max. sed 19.5% after 14 d). Max in total system 66.8% after 14 days, |                          |       |                                               |                  |                               |                  |                      |                  |                       |
|--------------------------------------|------------------------------------------------------------------------------------------------------------------------------------------------------------|--------------------------|-------|-----------------------------------------------|------------------|-------------------------------|------------------|----------------------|------------------|-----------------------|
| Water / sediment system              | pH water phase                                                                                                                                             | pH sed <sup>a)</sup>     | t. °C | DT <sub>50</sub> whole sys.                   | St. ( $\chi^2$ ) | DT <sub>50</sub> water        | St. ( $\chi^2$ ) | DT <sub>50</sub> sed | St. ( $\chi^2$ ) | Method of calculation |
| Cyclopropyl, System I (Rhine)        | 8.2                                                                                                                                                        | 7.8 (KCl)                | 20°   | 23.2 (SFO)                                    | 25.8             | No reliable endpoints derived | -                | 36.4 (SFO)           | 12.7             | /                     |
| Cyclopropyl, System II (Judenweiher) | 7.2                                                                                                                                                        | 7.1 (KCl)                | 20°   | 35.3 (SFO)                                    | 14.4             | 30.5 (SFO)                    | 14.7             | 50.4 (SFO)           | 20.7             | /                     |
| System III (Berghäuser Altrhein)     | 7.9                                                                                                                                                        | 7.0 (CaCl <sub>2</sub> ) | 20°   | 6.6 (SFO)                                     | 11.4             | 7.4 (SFO)                     | 12.3             | n.c.                 |                  |                       |
| System IV (Ranschgraben)             | 7.3                                                                                                                                                        | 5.9 (CaCl <sub>2</sub> ) | 20°   | n.c. (DT50 water used for geomean whole sys.) | /                | 12.3 (SFO)                    | 15.9             | n.c.                 |                  |                       |
| Geometric mean at 20°C <sup>b)</sup> |                                                                                                                                                            |                          |       | 16.1                                          |                  | 14.1                          |                  | 42.8                 |                  |                       |

n.c. : not calculated due to either limited number of data points available (Berghäuser Altrhein) or not observed in the sediment phase (Ranschgraben)

<sup>a)</sup> Measured in [medium to be stated, usually calcium chloride solution or water]

<sup>b)</sup> Normalised using a Q10 of 2.58

## Modelling endpoints - Degradation (for FOCUS Step 3)

| (cis-)DCVA                           | Parent alpha-cypermethrin dosed studies, distribution (max in water 47.3% after 14 d. Max. sed 19.5% after 14 d). Max in total system 66.8% after 14 days, kinetic formation fraction ( $k_f/k_{dp}$ ): in total system, formation fraction of 0.816 from alpha-cypermethrin |                          |       |                                                      |                  |                       |
|--------------------------------------|------------------------------------------------------------------------------------------------------------------------------------------------------------------------------------------------------------------------------------------------------------------------------|--------------------------|-------|------------------------------------------------------|------------------|-----------------------|
| Water / sediment system              | pH water phase                                                                                                                                                                                                                                                               | pH sed <sup>a)</sup>     | t. °C | DegT <sub>50</sub> / DegT <sub>90</sub> whole system | St. ( $\chi^2$ ) | Method of calculation |
| Cyclopropyl, System I (Rhine)        | 8.2                                                                                                                                                                                                                                                                          | 7.8 (KCl)                | 20°   | 25.5<br>Ffm from parent:0.706                        | 28.0             | FOMC-SFO              |
| Cyclopropyl, System II (Judenweiher) | 7.2                                                                                                                                                                                                                                                                          | 7.1 (KCl)                | 20°   | 30.3<br>Ffm from parent:0.957                        | 10.7             | FOMC-SFO              |
| System III (Berghäuser Altrhein)     | 7.9                                                                                                                                                                                                                                                                          | 7.0 (CaCl <sub>2</sub> ) | 20°   | 4.4<br>Ffm from parent:0.599                         | 20.4             | DFOP-SFO              |
| System IV (Ranschgraben)             | 7.3                                                                                                                                                                                                                                                                          | 5.9 (CaCl <sub>2</sub> ) | 20°   | 2.3<br>Ffm from parent:1.000                         | 25.7             | DFOP-SFO              |
| Geometric mean at 20°C <sup>b)</sup> |                                                                                                                                                                                                                                                                              |                          |       | 9.4                                                  |                  |                       |

<sup>a)</sup> Measured in [medium to be stated, usually calcium chloride solution or water]

<sup>b)</sup> Normalised using a Q10 of 2.58

| Mineralisation and non extractable residues (from parent dosed experiments) |                |                          |                                                   |                                                    |                                                                       |
|-----------------------------------------------------------------------------|----------------|--------------------------|---------------------------------------------------|----------------------------------------------------|-----------------------------------------------------------------------|
| Water / sediment system                                                     | pH water phase | pH sed                   | Mineralisation x % after n d. (end of the study). | Non-extractable residues in sed. max x % after n d | Non-extractable residues in sed. max x % after n d (end of the study) |
| Benzyl, System I (Rhine)                                                    | 8.2            | 7.8 (KCl)                | 24.9% after 105 days                              | 23.2% after 61 days                                | 18.9% after 105 days                                                  |
| Benzyl, System II (Judenweiher)                                             | 7.2            | 7.1 (KCl)                | 53.1% after 105 days                              | 37.3% after 30 days                                | 21.2% after 105 days                                                  |
| Benzyl, System III (Berghauser Altrhein)                                    | 7.9            | 7.0 (CaCl <sub>2</sub> ) | 43.2% after 100 days                              | 22.5% after 28 days                                | 20.1% after 100 days                                                  |
| Benzyl, System IV (Ranschgraben)                                            | 7.3            | 5.9 (CaCl <sub>2</sub> ) | 33.4% after 100 days                              | 20.5% after 57 days                                | 15.9% after 100 days                                                  |
| Cyclopropyl, System I (Rhine)                                               | 8.2            | 7.8 (KCl)                | 33.2% after 105 days                              | 16.9% after 60 days                                | 16.2% after 105 days                                                  |
| Cyclopropyl, System II (Judenweiher)                                        | 7.2            | 7.1 (KCl)                | 40.0% after 105 days                              | 37.1% after 105 days                               | 37.1% after 105 days                                                  |
| Cyclopropyl, System III (Berghauser Altrhein)                               | 7.9            | 7.0 (CaCl <sub>2</sub> ) | 42.6% after 100 days                              | 32.7% after 57 days                                | 27.8% after 100 days                                                  |
| Cyclopropyl, System IV (Ranschgraben)                                       | 7.3            | 5.9 (CaCl <sub>2</sub> ) | 32.0% after 100 days                              | 28.1% after 79 days                                | 26.0% after 100 days                                                  |



### Fate and behaviour in air (Regulation (EU) N° 283/2013, Annex Part A, point 7.3.1)

|                                            |                                                                                                                                                                |
|--------------------------------------------|----------------------------------------------------------------------------------------------------------------------------------------------------------------|
| Direct photolysis in air                   | Not studied - no data requested                                                                                                                                |
| Photochemical oxidative degradation in air | DT <sub>50</sub> of 5.99 hours derived by the Atkinson model (version 1.92). OH (12 h) concentration assumed = 1.5 x 10 <sup>6</sup> molecules/cm <sup>3</sup> |
| Volatilisation                             | from plant surfaces (BBA guideline): Not studied - not required                                                                                                |
|                                            | from soil surfaces (BBA guideline): Not studied – not required                                                                                                 |
| Metabolites                                | -                                                                                                                                                              |

### Residues requiring further assessment (Regulation (EU) N° 283/2013, Annex Part A, point 7.4.1)

|                                                                                                                                                                           |                                                                                                                                                                                                                                                                                                                                                                                                                                                   |
|---------------------------------------------------------------------------------------------------------------------------------------------------------------------------|---------------------------------------------------------------------------------------------------------------------------------------------------------------------------------------------------------------------------------------------------------------------------------------------------------------------------------------------------------------------------------------------------------------------------------------------------|
| Environmental occurring residues requiring further assessment by other disciplines (toxicology and ecotoxicology) and or requiring consideration for groundwater exposure | <p><u>Soil</u>: Alpha-cypermethrin, DCVA, 3-PBA and M310I017</p> <p><u>Surface water</u>: Alpha-cypermethrin, DCVA and 3-PBA, 3-PBAldehyde and M310I017 (data gap for identification of the radioactive fractions RW7 and RW9)</p> <p><u>Sediment</u>: Alpha-cypermethrin, DCVA, 3-PBA, 3-PBAldehyde and M310I017</p> <p><u>Ground water</u>: Alpha-cypermethrin, DCVA, 3-PBA, carboxamide and M310I017</p> <p><u>Air</u>: Alpha-cypermethrin</p> |
|---------------------------------------------------------------------------------------------------------------------------------------------------------------------------|---------------------------------------------------------------------------------------------------------------------------------------------------------------------------------------------------------------------------------------------------------------------------------------------------------------------------------------------------------------------------------------------------------------------------------------------------|

### Definition of the residue for monitoring (Regulation (EU) N° 283/2013, Annex Part A, point 7.4.2)

See section 5, Ecotoxicology

### Monitoring data, if available (Regulation (EU) N° 283/2013, Annex Part A, point 7.5)

|                                                     |                                                                                                                                                                                                            |
|-----------------------------------------------------|------------------------------------------------------------------------------------------------------------------------------------------------------------------------------------------------------------|
| Soil (indicate location and type of study)          | -                                                                                                                                                                                                          |
| Surface water (indicate location and type of study) | Monitoring data are available from two countries, from France (2000 to 2007) and from Finland (only 2005). In sum 18695 measurements are available from river waters, however only two of them were > LOQ. |
| Ground water (indicate location and type of study)  | -                                                                                                                                                                                                          |
| Air (indicate location and type of study)           | -                                                                                                                                                                                                          |

### PEC soil (Regulation (EU) N° 284/2013, Annex Part A, points 9.1.3 / 9.3.1)

|                            |                                                                                                         |
|----------------------------|---------------------------------------------------------------------------------------------------------|
| Parent: alpha-cypermethrin | DT <sub>50</sub> (d): 46.1 days                                                                         |
| Method of calculation      | <p>Kinetics: SFO</p> <p>Field or Lab: worst case actual DT<sub>50</sub> from US + EU field studies.</p> |

Application data

Crop: cabbage  
 Depth of soil layer: 5cm  
 Soil bulk density: 1.5g/cm<sup>3</sup>  
 % plant interception: 25% crop interception  
 Number of applications: 1  
 Interval (d): -  
 Application rate(s): 20 g a.s./ha

Note: RMS considers that the DT50 of 6.3 is not suitable, therefore only the initial PECsoil is acceptable.

| PEC <sub>(s)</sub><br>(mg/kg) | Single application | Single application    | Multiple application | Multiple application  |
|-------------------------------|--------------------|-----------------------|----------------------|-----------------------|
|                               | Actual             | Time weighted average | Actual               | Time weighted average |
| Initial                       | 0.020              |                       | -                    |                       |
| Short term                    | 24h                | 0.020                 | 0.020                |                       |
|                               | 2d                 | 0.019                 | 0.020                |                       |
|                               | 4d                 | 0.019                 | 0.019                |                       |
| Long term                     | 7d                 | 0.018                 | 0.019                |                       |
|                               | 28d                | 0.013                 | 0.016                |                       |
|                               | 50d                | 0.009                 | 0.014                |                       |
|                               | 100d               | 0.004                 | 0.010                |                       |
| Plateau concentration         | -                  |                       |                      |                       |

Metabolite **M310I017**

Method of calculation

Molecular weight relative to the parent: 1.038  
 DT<sub>50</sub> (d): 42.3 days  
 Kinetics: SFO  
 Field or Lab: worst case lab studies.

Application data

Application rate assumed: 1.3 g/ha (assumed **M310I017** is formed at a maximum of 8.4% of the applied dose)

| PEC <sub>(s)</sub><br>(mg/kg) | Single application | Single application    | Multiple application | Multiple application  |
|-------------------------------|--------------------|-----------------------|----------------------|-----------------------|
|                               | Actual             | Time weighted average | Actual               | Time weighted average |
| Initial                       | 0.0017             |                       | -                    |                       |

Metabolite **DCVA**

Method of calculation

Molecular weight relative to the parent: 0.502  
 DT<sub>50</sub> (d): 13.5 days  
 Kinetics: SFO  
 Field or Lab: worst case lab studies.

Application data

Application rate assumed: 1.0 g/ha (assumed **DCVA** is formed at a maximum of 13.6% of the applied dose)

| PEC <sub>(s)</sub><br>(mg/kg) | Single application<br>Actual | Single application<br>Time weighted<br>average | Multiple application<br>Actual | Multiple application<br>Time weighted<br>average |
|-------------------------------|------------------------------|------------------------------------------------|--------------------------------|--------------------------------------------------|
|                               | Initial                      | 0.0014                                         |                                | -                                                |

|                                     |                                                                                                               |                       |                      |                       |
|-------------------------------------|---------------------------------------------------------------------------------------------------------------|-----------------------|----------------------|-----------------------|
| Metabolite <b>3-PBA</b>             | Molecular weight relative to the parent: 0.515                                                                |                       |                      |                       |
| Method of calculation               | DT <sub>50</sub> (d): 2.9 days (the correct value is 5 d)                                                     |                       |                      |                       |
|                                     | Kinetics: SFO                                                                                                 |                       |                      |                       |
|                                     | Field or Lab: worst case lab studies.                                                                         |                       |                      |                       |
| Application data                    | Application rate assumed: 2.2 g/ha (assumed <b>3-PBA</b> is formed at a maximum of 28.6% of the applied dose) |                       |                      |                       |
| <b>PEC<sub>(s)</sub></b><br>(mg/kg) | Single application                                                                                            | Single application    | Multiple application | Multiple application  |
|                                     | Actual                                                                                                        | Time weighted average | Actual               | Time weighted average |
| Initial                             | 0.0029                                                                                                        |                       | -                    |                       |

**PEC ground water (Regulation (EU) N° 284/2013, Annex Part A, point 9.2.4.1)**

Method of calculation and type of study (e.g. modelling, field leaching, lysimeter)

For FOCUS gw modelling, values used –

Modelling using FOCUS model(s), with appropriate FOCUSgw scenarios, according to FOCUS guidance.

Model(s) used: FOCUS-PEARL 4.4.4 and FOCUS-PELMO 5.5.3

Crop: Spring cereals, winter cereals, winter oilseed rape, cabbage

Crop uptake factor: 0

**Parent alpha cypermethrin:**

Molecular weight: 416.3

Water solubility (mg/L): 0.003 at pH 6.5 and 20°C

Vapour pressure:  $3.8 \times 10^{-7}$  Pa at 20°C

Geometric mean parent  $DT_{50 \text{ lab/field}}$  of 33.1 days (normalisation to 10kPa or pF2, 20 °C with Q10 of 2.58 and Walker equation coefficient 0.7).

$K_{OC}$ : 284839 mL/g (geometric mean),  $1/n = 1$  (default value)

**Metabolite M310I017:**

Molecular weight: 432.3

Water solubility (mg/L): 0.072 at 20°C

Vapour pressure:  $1.0 \times 10^{-10}$  Pa at 20°C (worst case assumption)

Geometric mean parent  $DT_{50 \text{ lab}}$  of 11.8 days (normalisation to 10kPa or pF2, 20 °C with Q10 of 2.58 and Walker equation coefficient 0.7).

$K_{OC}$ : 234901 mL/g (geometric mean),  $1/n = 1$  (default value)

Ffm: 0.344 from alpha-cypermethrin (for PEARL) ; Transformation rate of alpha-cypermethrin to M310I017 of 0.007204 (for PELMO)

**Metabolite DCVA:**

Molecular weight: 209.1

Water solubility (mg/L): 129 at pH 4.0 and 20°C

Vapour pressure:  $1.0 \times 10^{-10}$  Pa at 20°C (worst case assumption)

Geometric mean parent  $DT_{50 \text{ lab}}$  of 4.8 days (normalisation to 10kPa or pF2, 20 °C with Q10 of 2.58 and Walker equation coefficient 0.7) (Note: the correct value is 5.1 d).

$K_{OC}$ : 46.3 mL/g (geometric mean),  $1/n = 0.72$  (arithmetic mean)

Ffm: 1.0 from alpha-cypermethrin (for PEARL) ; Transformation rate of alpha-cypermethrin to DCVA of 0.020941 (for PELMO)

**Metabolite 3-PBA:**

Molecular weight: 214.2

Water solubility (mg/L): 24.7 at pH 4.2 and 20°C

Vapour pressure:  $1.0 \times 10^{-10}$  Pa at 20°C (worst case assumption)

Application rate

Geometric mean parent  $DT_{50 \text{ lab}}$  of 1.1 day (normalisation to 10kPa or pF2, 20 °C with Q10 of 2.58 and Walker equation coefficient 0.7) (Note: the correct value is 1.7 d).

$K_{OC}$ : 78.5 mL/g (geometric mean),  $1/n = 0.78$  (arithmetic mean) (Note: the correct values are 72.7 mL/g (geometric mean),  $1/n = 0.81$  (arithmetic mean))

Ffm: 1.0 from alpha-cypermethrin (for PEARL) ; Transformation rate of alpha-cypermethrin to 3-PBA of 0.020941 (for PELMO)

For field and lysimeter studies : /

#### Spring cereals

Gross application rate: 10 g/ha.

Crop growth stage: BBCH 51

Canopy interception: 90% / 90%

Application rate net of interception: 1.0 g/ha.

No. of applications: 2

Application interval: 7 days

Time of application (absolute or relative application dates):

| Scenario     | 1 <sup>st</sup> application | 2 <sup>nd</sup> application |
|--------------|-----------------------------|-----------------------------|
| Châteaudun   | 11 <sup>th</sup> May        | 18 <sup>th</sup> May        |
| Hamburg      | 11 <sup>th</sup> June       | 18 <sup>th</sup> June       |
| Jokioinen    | 16 <sup>th</sup> June       | 23 <sup>rd</sup> June       |
| Kremsmünster | 11 <sup>th</sup> June       | 18 <sup>th</sup> June       |
| Okehampton   | 11 <sup>th</sup> June       | 18 <sup>th</sup> June       |
| Porto        | 11 <sup>th</sup> May        | 18 <sup>th</sup> May        |

#### Winter cereals

Gross application rate: 10 g/ha.

Crop growth stage: BBCH 51

Canopy interception: 90% / 90%

Application rate net of interception: 1.0 g/ha.

No. of applications: 2

Application interval: 7 days

Time of application (absolute or relative application dates):

| Scenario     | 1 <sup>st</sup> application | 2 <sup>nd</sup> application |
|--------------|-----------------------------|-----------------------------|
| Châteaudun   | 6 <sup>th</sup> May         | 13 <sup>th</sup> May        |
| Hamburg      | 1 <sup>st</sup> June        | 8 <sup>th</sup> June        |
| Jokioinen    | 6 <sup>th</sup> June        | 13 <sup>th</sup> June       |
| Kremsmünster | 1 <sup>st</sup> June        | 8 <sup>th</sup> June        |
| Okehampton   | 23 <sup>rd</sup> May        | 30 <sup>th</sup> May        |
| Piacenza     | 22 <sup>nd</sup> April      | 29 <sup>th</sup> April      |
| Porto        | 21 <sup>st</sup> April      | 28 <sup>th</sup> April      |
| Sevilla      | 22 <sup>nd</sup> March      | 29 <sup>th</sup> March      |
| Thiva        | 21 <sup>st</sup> April      | 28 <sup>th</sup> April      |

#### Winter oilseed rape

Gross application rate: 10 g/ha.

Crop growth stage: BBCH 51

Canopy interception: 80% / 80%

Application rate net of interception: 2.0 g/ha.

No. of applications: 2

Application interval: 7 days

Time of application (absolute or relative application dates):

| Scenario     | 1 <sup>st</sup> application | 2 <sup>nd</sup> application |
|--------------|-----------------------------|-----------------------------|
| Châteaudun   | 17 <sup>th</sup> April      | 24 <sup>th</sup> April      |
| Hamburg      | 5 <sup>th</sup> May         | 12 <sup>th</sup> May        |
| Kremsmünster | 5 <sup>th</sup> May         | 12 <sup>th</sup> May        |
| Okehampton   | 28 <sup>th</sup> April      | 5 <sup>th</sup> May         |
| Piacenza     | 28 <sup>th</sup> March      | 4 <sup>th</sup> April       |
| Porto        | 17 <sup>th</sup> April      | 24 <sup>th</sup> April      |

### Cabbage

Gross application rate: 20 g/ha.

Crop growth stage: BBCH 10

Canopy interception: 25%

Application rate net of interception: 15.0 g/ha.

No. of applications: 1

Application interval: -

Time of application (absolute or relative application dates):

| Scenario                      | 1 <sup>st</sup> application |
|-------------------------------|-----------------------------|
| Châteaudun, 1 <sup>st</sup>   | 21 <sup>st</sup> April      |
| Châteaudun, 2 <sup>nd</sup>   | 1 <sup>st</sup> August      |
| Hamburg, 1 <sup>st</sup>      | 21 <sup>st</sup> April      |
| Hamburg, 2 <sup>nd</sup>      | 1 <sup>st</sup> August      |
| Jokioinen                     | 21 <sup>st</sup> May        |
| Kremsmünster, 1 <sup>st</sup> | 21 <sup>st</sup> April      |
| Kremsmünster, 2 <sup>nd</sup> | 1 <sup>st</sup> August      |
| Porto, 1 <sup>st</sup>        | 1 <sup>st</sup> March       |
| Porto, 2 <sup>nd</sup>        | 1 <sup>st</sup> August      |
| Sevilla, 1 <sup>st</sup>      | 2 <sup>nd</sup> March       |
| Sevilla, 2 <sup>nd</sup>      | 16 <sup>th</sup> June       |
| Thiva,                        | 16 <sup>th</sup> August     |

### Tomatoes

Gross application rate: 30 g/ha.

Crop growth stage: BBCH 10

Canopy interception: 50%

Application rate net of interception: 15.0 g/ha.

No. of applications: 1

Application interval: -

Time of application (absolute or relative application dates):

| Scenario   | 1 <sup>st</sup> application |
|------------|-----------------------------|
| Châteaudun | 11 <sup>th</sup> May        |
| Piacenza   | 11 <sup>th</sup> May        |
| Porto      | 16 <sup>th</sup> March      |
| Sevilla    | 16 <sup>th</sup> April      |
| Thiva      | 11 <sup>th</sup> April      |

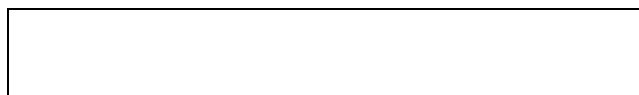
**PEC(gw) - FOCUS modelling results (80<sup>th</sup> percentile annual average concentration at 1m)**
Spring cereals

| PEARL 4.4.4 /Spring cereals | Scenario     | Parent (µg/L) | Metabolites (µg/L) |        |        |
|-----------------------------|--------------|---------------|--------------------|--------|--------|
|                             |              |               | M310I017           | DCVA   | 3-PBA  |
|                             | Chateaudun   | <0.001        | <0.001             | <0.001 | <0.001 |
|                             | Hamburg      | <0.001        | <0.001             | <0.001 | <0.001 |
|                             | Jokioinen    | <0.001        | <0.001             | <0.001 | <0.001 |
|                             | Kremsmunster | <0.001        | <0.001             | <0.001 | <0.001 |
|                             | Okehampton   | <0.001        | <0.001             | <0.001 | <0.001 |
|                             | Porto        | <0.001        | <0.001             | <0.001 | <0.001 |

| PELMO 5.5.3 /Spring cereals | Scenario     | Parent (µg/L) | Metabolites (µg/L) |        |        |
|-----------------------------|--------------|---------------|--------------------|--------|--------|
|                             |              |               | M310I017           | DCVA   | 3-PBA  |
|                             | Chateaudun   | <0.001        | <0.001             | <0.001 | <0.001 |
|                             | Hamburg      | <0.001        | <0.001             | <0.001 | <0.001 |
|                             | Jokioinen    | <0.001        | <0.001             | <0.001 | <0.001 |
|                             | Kremsmunster | <0.001        | <0.001             | <0.001 | <0.001 |
|                             | Okehampton   | <0.001        | <0.001             | <0.001 | <0.001 |
|                             | Porto        | <0.001        | <0.001             | <0.001 | <0.001 |



## Winter cereals

| PEARL 4.4.4 / winter cereals | Scenario     | Parent<br>(µg/L) | Metabolites (µg/L) |        |        |
|------------------------------|--------------|------------------|--------------------|--------|--------|
|                              |              |                  | M310I017           | DCVA   | 3-PBA  |
|                              | Chateaudun   | <0.001           | <0.001             | <0.001 | <0.001 |
|                              | Hamburg      | <0.001           | <0.001             | <0.001 | <0.001 |
|                              | Jokioinen    | <0.001           | <0.001             | <0.001 | <0.001 |
|                              | Kremsmunster | <0.001           | <0.001             | <0.001 | <0.001 |
|                              | Okehampton   | <0.001           | <0.001             | <0.001 | <0.001 |
|                              | Piacenza     | <0.001           | <0.001             | <0.001 | <0.001 |
|                              | Porto        | <0.001           | <0.001             | <0.001 | <0.001 |
|                              | Sevilla      | <0.001           | <0.001             | <0.001 | <0.001 |
| Thiva                        | <0.001       | <0.001           | <0.001             | <0.001 |        |

| PELMO 5.5.3 / winter cereals | Scenario     | Parent<br>(µg/L) | Metabolites (µg/L) |        |        |
|------------------------------|--------------|------------------|--------------------|--------|--------|
|                              |              |                  | M310I017           | DCVA   | 3-PBA  |
|                              | Chateaudun   | <0.001           | <0.001             | <0.001 | <0.001 |
|                              | Hamburg      | <0.001           | <0.001             | <0.001 | <0.001 |
|                              | Jokioinen    | <0.001           | <0.001             | <0.001 | <0.001 |
|                              | Kremsmunster | <0.001           | <0.001             | <0.001 | <0.001 |
|                              | Okehampton   | <0.001           | <0.001             | <0.001 | <0.001 |
|                              | Piacenza     | <0.001           | <0.001             | <0.001 | <0.001 |
|                              | Porto        | <0.001           | <0.001             | <0.001 | <0.001 |
|                              | Sevilla      | <0.001           | <0.001             | <0.001 | <0.001 |
| Thiva                        | <0.001       | <0.001           | <0.001             | <0.001 |        |

## Winter oilseed rape

| PEARL 4.4.4 / winter oilseed rape | Scenario   | Parent (µg/L) | Metabolites (µg/L) |        |        |
|-----------------------------------|------------|---------------|--------------------|--------|--------|
|                                   |            |               | M310I017           | DCVA   | 3-PBA  |
|                                   | Chateaudun | <0.001        | <0.001             | <0.001 | <0.001 |
| Hamburg                           | <0.001     | <0.001        | <0.001             | <0.001 |        |
| Kremsmunster                      | <0.001     | <0.001        | <0.001             | <0.001 |        |
| Okehampton                        | <0.001     | <0.001        | <0.001             | <0.001 |        |
| Piacenza                          | <0.001     | <0.001        | <0.001             | <0.001 |        |
| Porto                             | <0.001     | <0.001        | <0.001             | <0.001 |        |

| PELMO 5.5.3 / winter oilseed rape | Scenario   | Parent (µg/L) | Metabolites (µg/L) |        |        |
|-----------------------------------|------------|---------------|--------------------|--------|--------|
|                                   |            |               | M310I017           | DCVA   | 3-PBA  |
|                                   | Chateaudun | <0.001        | <0.001             | <0.001 | <0.001 |
| Hamburg                           | <0.001     | <0.001        | <0.001             | <0.001 |        |
| Kremsmunster                      | <0.001     | <0.001        | <0.001             | <0.001 |        |
| Okehampton                        | <0.001     | <0.001        | <0.001             | <0.001 |        |
| Piacenza                          | <0.001     | <0.001        | <0.001             | <0.001 |        |
| Porto                             | <0.001     | <0.001        | <0.001             | <0.001 |        |

## Cabbage

| PEARL 4.4.4 /cabbage | Scenario                      | Parent (µg/L) | Metabolites (µg/L) |        |        |
|----------------------|-------------------------------|---------------|--------------------|--------|--------|
|                      |                               |               | M310I017           | DCVA   | 3-PBA  |
|                      | Chateaudun, 1 <sup>st</sup>   | <0.001        | <0.001             | <0.001 | <0.001 |
|                      | Chateaudun, 2 <sup>nd</sup>   | <0.001        | <0.001             | <0.001 | <0.001 |
|                      | Hamburg, 1 <sup>st</sup>      | <0.001        | <0.001             | <0.001 | <0.001 |
|                      | Hamburg, 2 <sup>nd</sup>      | <0.001        | <0.001             | <0.001 | <0.001 |
|                      | Jokioinen                     | <0.001        | <0.001             | <0.001 | <0.001 |
|                      | Kremsmunster, 1 <sup>st</sup> | <0.001        | <0.001             | <0.001 | <0.001 |
|                      | Kremsmunster, 2 <sup>nd</sup> | <0.001        | <0.001             | <0.001 | <0.001 |
|                      | Porto, 1 <sup>st</sup>        | <0.001        | <0.001             | <0.001 | <0.001 |
|                      | Porto, 2 <sup>nd</sup>        | <0.001        | <0.001             | <0.001 | <0.001 |
|                      | Sevilla, 1 <sup>st</sup>      | <0.001        | <0.001             | <0.001 | <0.001 |
|                      | Sevilla, 2 <sup>nd</sup>      | <0.001        | <0.001             | <0.001 | <0.001 |
|                      | Thiva                         | <0.001        | <0.001             | <0.001 | <0.001 |

| PELMO 5.5.3 /cabbage | Scenario                      | Parent (µg/L) | Metabolites (µg/L) |        |        |
|----------------------|-------------------------------|---------------|--------------------|--------|--------|
|                      |                               |               | M310I017           | DCVA   | 3-PBA  |
|                      | Chateaudun, 1 <sup>st</sup>   | <0.001        | <0.001             | <0.001 | <0.001 |
|                      | Chateaudun, 2 <sup>nd</sup>   | <0.001        | <0.001             | <0.001 | <0.001 |
|                      | Hamburg, 1 <sup>st</sup>      | <0.001        | <0.001             | <0.001 | <0.001 |
|                      | Hamburg, 2 <sup>nd</sup>      | <0.001        | <0.001             | <0.001 | <0.001 |
|                      | Jokioinen                     | <0.001        | <0.001             | <0.001 | <0.001 |
|                      | Kremsmunster, 1 <sup>st</sup> | <0.001        | <0.001             | <0.001 | <0.001 |
|                      | Kremsmunster, 2 <sup>nd</sup> | <0.001        | <0.001             | <0.001 | <0.001 |
|                      | Porto, 1 <sup>st</sup>        | <0.001        | <0.001             | <0.001 | <0.001 |
|                      | Porto, 2 <sup>nd</sup>        | <0.001        | <0.001             | <0.001 | <0.001 |
|                      | Sevilla, 1 <sup>st</sup>      | <0.001        | <0.001             | <0.001 | <0.001 |
|                      | Sevilla, 2 <sup>nd</sup>      | <0.001        | <0.001             | <0.001 | <0.001 |
|                      | Thiva                         | <0.001        | <0.001             | <0.001 | <0.001 |

## Tomatoes

| PEARL 4.4.4<br>tomatoes | Scenario   | Parent<br>(µg/L) | Metabolites (µg/L) |        |        |
|-------------------------|------------|------------------|--------------------|--------|--------|
|                         |            |                  | M310I017           | DCVA   | 3-PBA  |
|                         | Chateaudun | <0.001           | <0.001             | <0.001 | <0.001 |
| Piacenza                | <0.001     | <0.001           | <0.001             | <0.001 |        |
| Porto                   | <0.001     | <0.001           | <0.001             | <0.001 |        |
| Sevilla                 | <0.001     | <0.001           | <0.001             | <0.001 |        |
| Thiva                   | <0.001     | <0.001           | <0.001             | <0.001 |        |

| PELMO 5.5.3<br>tomatoes | Scenario   | Parent<br>(µg/L) | Metabolites (µg/L) |        |        |
|-------------------------|------------|------------------|--------------------|--------|--------|
|                         |            |                  | M310I017           | DCVA   | 3-PBA  |
|                         | Chateaudun | <0.001           | <0.001             | <0.001 | <0.001 |
| Piacenza                | <0.001     | <0.001           | <0.001             | <0.001 |        |
| Porto                   | <0.001     | <0.001           | <0.001             | <0.001 |        |
| Sevilla                 | <0.001     | <0.001           | <0.001             | <0.001 |        |
| Thiva                   | <0.001     | <0.001           | <0.001             | <0.001 |        |

PEC<sub>(gw)</sub> From lysimeter / field studies

| Parent                | 1 <sup>st</sup> year | 2 <sup>nd</sup> year | 3 <sup>rd</sup> year |
|-----------------------|----------------------|----------------------|----------------------|
| Annual average (µg/L) | Not available        | Not available        | Not available        |

| Metabolite X          | 1 <sup>st</sup> year | 2 <sup>nd</sup> year | 3 <sup>rd</sup> year |
|-----------------------|----------------------|----------------------|----------------------|
| Annual average (µg/L) | Not available        | Not available        | Not available        |

**PEC surface water and PEC sediment (Regulation (EU) N° 284/2013, Annex Part A, points 9.2.5 / 9.3.1)**

|                                                           |                                                                                                                                                                                                                                                                                                                                                                                                                                                                                                                                                             |
|-----------------------------------------------------------|-------------------------------------------------------------------------------------------------------------------------------------------------------------------------------------------------------------------------------------------------------------------------------------------------------------------------------------------------------------------------------------------------------------------------------------------------------------------------------------------------------------------------------------------------------------|
| <p>Parent<br/>Parameters used in FOCUSsw step 1 and 2</p> | <p>Version control no. of FOCUS calculator: STEPS1-2 in FOCUS version 3.2<br/>Molecular weight (g/mol): 416.3<br/>K<sub>OC</sub> : 284839 mL/g (geometric mean)<br/>DT<sub>50</sub> soil (d): 33.1 days (geomean from combined Lab and field DT50's)<br/>DT<sub>50</sub> water/sediment system : 27.9 days (geomean from sediment water studies)<br/>DT<sub>50</sub> water : 27.9 days<br/>DT<sub>50</sub> sediment : 27.9 days<br/><u>Vegetables, leafy</u><br/>Crop interception (%): minimal crop cover</p>                                              |
| <p>Parameters used in FOCUSsw step 3 (if performed)</p>   | <p>Version control no.'s of FOCUS software: FOCUS-PRZM version 4.3.1, FOCUS-MACRO version 5.5.4, FOCUS-TOXSWA version 4.4.3, SWASH version 5.1 and SWAN version 4.0.1<br/>Water solubility (mg/L): 0.003 mg/L<br/>Vapour pressure: 3.8 x 10<sup>-7</sup> Pa at 20°C<br/>Koc (mL/g): 284839 mL/g (geometric mean)<br/>1/n: 1 (default value)<br/>Q10=2.58, Walker equation coefficient 0.7<br/>Crop uptake factor: 0<br/>DT<sub>50</sub> water : 1000 days (default value)<br/>DT<sub>50</sub> sediment : 27.9 days<br/>Application method: ground spray</p> |

## Application rate

Vegetables, leafy (FOCUS Step 1-2)

Crop and growth stage: minimal crop cover

Number of applications: 2

Interval : 7 days

Application rate(s): 10 g a.s./ha

Application window: March-May, North and South Europe

Crop and growth stage: minimal crop cover

Number of applications: 1

Interval : -

Application rate(s): 20 g a.s./ha

Application window: March-May, North and South Europe

Vegetables, fruiting – Greenhouse (FOCUS Step 2) default drift value of 0.1%

Crop and growth stage: no interception

Number of applications: 2

Interval : 7 days

Application rate(s): 15 g a.s./ha

Application window: March-May, North and South Europe

Crop and growth stage: no interception

Number of applications: 1

Interval : -

Application rate(s): 30 g a.s./ha

Application window: March-May, North and South Europe

Spring and winter cereals (FOCUS Step 3-4)

Crop and growth stage: BBCH 51 - 83

Number of applications: 2

Interval (d): variable (PAT)

Application rate(s): 10 g a.s./ha

Application window: 70 days to 28 days before harvest

Winter oilseed rape (FOCUS Step 3-4)

Crop and growth stage: BBCH 51 - 59

Number of applications: 2

Interval (d): variable (PAT)

Application rate(s): 10 g a.s./ha

Application window: 84 days to 47 days before harvest

Vegetables leafy (FOCUS Step 3-4)

Crop and growth stage: BBCH 10 - 49

Number of applications: 2

Interval (d): variable (PAT)

Application rate(s): 10 g a.s./ha  
 Application window: early application: 1 day after emergence to 37 days later; late application: 40 days before harvest to 3 days before harvest

Crop and growth stage: BBCH 10 - 49  
 Number of applications: 1  
 Interval (d): -  
 Application rate(s): 20 g a.s./ha  
 Application window: 1 day after emergence to 3 days before harvest

| FOCUS STEP 1<br>Scenario                             | Day after overall maximum | PEC <sub>SW</sub> (µg/L) |     | PEC <sub>SED</sub> (µg/kg) |     |
|------------------------------------------------------|---------------------------|--------------------------|-----|----------------------------|-----|
|                                                      |                           | Actual                   | TWA | Actual                     | TWA |
| Vegetables, leafy;<br>2 x 10 g a.s. ha <sup>-1</sup> | 0 h                       | 0.201                    |     | 49.869                     |     |
| Vegetables, leafy;<br>1 x 20 g a.s. ha <sup>-1</sup> | 0 h                       | 0.201                    |     | 49.869                     |     |

| FOCUS STEP 2<br>Scenario<br>North Europe             | Day after overall maximum | PEC <sub>SW</sub> (µg/L) |     | PEC <sub>SED</sub> (µg/kg) |     |
|------------------------------------------------------|---------------------------|--------------------------|-----|----------------------------|-----|
|                                                      |                           | Actual                   | TWA | Actual                     | TWA |
| Vegetables, leafy;<br>1 x 10 g a.s. ha <sup>-1</sup> | 0 h                       | 0.092                    |     | 4.054                      |     |
| Vegetables, leafy;<br>2 x 10 g a.s. ha <sup>-1</sup> | 0 h                       | 0.082                    |     | 7.415                      |     |
| Vegetables, leafy;<br>1 x 20 g a.s. ha <sup>-1</sup> | 0 h                       | 0.184                    |     | 8.108                      |     |

| FOCUS STEP 2<br>Scenario<br>South Europe                | Day after<br>overall<br>maximum | PEC <sub>SW</sub> (µg/L) |     | PEC <sub>SED</sub> (µg/kg) |     |
|---------------------------------------------------------|---------------------------------|--------------------------|-----|----------------------------|-----|
|                                                         |                                 | Actual                   | TWA | Actual                     | TWA |
| Vegetables,<br>leafy;<br>1 x 10 g a.s. ha <sup>-1</sup> | 0 h                             | 0.092                    |     | 7.494                      |     |
| Vegetables,<br>leafy;<br>2 x 10 g a.s. ha <sup>-1</sup> | 0 h                             | 0.082                    |     | 13.825                     |     |
| Vegetables,<br>leafy;<br>1 x 20 g a.s. ha <sup>-1</sup> | 0 h                             | 0.184                    |     | 14.987                     |     |

| FOCUS STEP 2<br>Scenario<br>Greenhouse                     | Day after<br>overall<br>maximum | PEC <sub>SW</sub> (µg/L) |     | PEC <sub>SED</sub> (µg/kg) |     |
|------------------------------------------------------------|---------------------------------|--------------------------|-----|----------------------------|-----|
|                                                            |                                 | Actual                   | TWA | Actual                     | TWA |
| Vegetables,<br>fruiting;<br>2 x 15 g a.s. ha <sup>-1</sup> | 0 h                             | 0.005                    |     | 0.063                      |     |
| Vegetables,<br>fruiting;<br>1 x 30 g a.s. ha <sup>-1</sup> | 0 h                             | 0.010                    |     | 0.067                      |     |



**FOCUS Step 3-4 PEC's in surface water**

For Step 4: D = Drift mitigation by no-spray buffer zones [m] ; N = Drift mitigation by drift reducing nozzles [%]

PEC<sub>sw,max</sub> of alpha-cypermethrin following single application of 10 g as/ha to spring cereals

| Location | Water body | PEC <sub>sw,max</sub> [ $\mu\text{g L}^{-1}$ ] and main entry route |                        |                        |                |                 |                |
|----------|------------|---------------------------------------------------------------------|------------------------|------------------------|----------------|-----------------|----------------|
|          |            | Step 3                                                              | Step 4                 |                        |                |                 |                |
|          |            | Edge-of-Field                                                       | 0mD <sup>a</sup> + 75N | 0mD <sup>a</sup> + 95N | 5mD            | 5mD + 50N       | 10mD           |
| D1       | ditch      | 0.053<br>Drift                                                      | 0.013<br>Drift         | 0.003<br>Drift         | 0.014<br>Drift | 0.007<br>Drift  | 0.008<br>Drift |
| D1       | stream     | 0.046<br>Drift                                                      | 0.011<br>Drift         | 0.002<br>Drift         | 0.017<br>Drift | 0.008<br>Drift  | 0.009<br>Drift |
| D3       | ditch      | 0.052<br>Drift                                                      | 0.013<br>Drift         | 0.003<br>Drift         | 0.014<br>Drift | 0.007<br>Drift  | 0.008<br>Drift |
| D4       | pond       | 0.002<br>Drift                                                      | <0.001<br>Drift        | <0.001<br>Drift        | 0.002<br>Drift | <0.001<br>Drift | 0.001<br>Drift |
| D4       | stream     | 0.045<br>Drift                                                      | 0.011<br>Drift         | 0.002<br>Drift         | 0.016<br>Drift | 0.008<br>Drift  | 0.009<br>Drift |
| D5       | pond       | 0.002<br>Drift                                                      | <0.001<br>Drift        | <0.001<br>Drift        | 0.002<br>Drift | <0.001<br>Drift | 0.001<br>Drift |
| D5       | stream     | 0.045<br>Drift                                                      | 0.011<br>Drift         | 0.002<br>Drift         | 0.017<br>Drift | 0.008<br>Drift  | 0.009<br>Drift |
| R4       | stream     | 0.034<br>Drift                                                      | 0.009<br>Drift         | 0.002<br>Drift         | 0.013<br>Drift | 0.006<br>Drift  | 0.007<br>Drift |

<sup>a</sup> Standard Step 3 buffer according to FOCUS (d = 0.5 m, s = 1.0 m)

D = Drift mitigation by no-spray buffer zones [m]

N = Drift mitigation by drift reducing nozzles [%]

PEC<sub>sw,max</sub> of alpha-cypermethrin following twofold application of 10 g as/ha to spring cereals

| Location | Water body | PEC <sub>sw,max</sub> [ $\mu\text{g L}^{-1}$ ] and main entry route |                        |                        |                |                 |                |
|----------|------------|---------------------------------------------------------------------|------------------------|------------------------|----------------|-----------------|----------------|
|          |            | Step 3                                                              | Step 4                 |                        |                |                 |                |
|          |            | Edge-of-Field                                                       | 0mD <sup>a</sup> + 75N | 0mD <sup>a</sup> + 95N | 5mD            | 5mD + 50N       | 10mD           |
| D1       | ditch      | 0.048<br>Drift                                                      | 0.012<br>Drift         | 0.002<br>Drift         | 0.012<br>Drift | 0.006<br>Drift  | 0.007<br>Drift |
| D1       | stream     | 0.040<br>Drift                                                      | 0.010<br>Drift         | 0.002<br>Drift         | 0.014<br>Drift | 0.007<br>Drift  | 0.007<br>Drift |
| D3       | ditch      | 0.047<br>Drift                                                      | 0.012<br>Drift         | 0.002<br>Drift         | 0.012<br>Drift | 0.006<br>Drift  | 0.006<br>Drift |
| D4       | pond       | 0.002<br>Drift                                                      | <0.001<br>Drift        | <0.001<br>Drift        | 0.002<br>Drift | <0.001<br>Drift | 0.001<br>Drift |
| D4       | stream     | 0.039<br>Drift                                                      | 0.010<br>Drift         | 0.002<br>Drift         | 0.014<br>Drift | 0.007<br>Drift  | 0.007<br>Drift |
| D5       | pond       | 0.002<br>Drift                                                      | <0.001<br>Drift        | <0.001<br>Drift        | 0.002<br>Drift | <0.001<br>Drift | 0.001<br>Drift |
| D5       | stream     | 0.042<br>Drift                                                      | 0.010<br>Drift         | 0.002<br>Drift         | 0.015<br>Drift | 0.007<br>Drift  | 0.008<br>Drift |
| R4       | stream     | 0.030<br>Drift                                                      | 0.007<br>Drift         | 0.001<br>Drift         | 0.010<br>Drift | 0.005<br>Drift  | 0.005<br>Drift |

<sup>a</sup> Standard Step 3 buffer according to FOCUS (d = 0.5 m, s = 1.0 m)

D = Drift mitigation by no-spray buffer zones [m]

N = Drift mitigation by drift reducing nozzles [%]

PEC<sub>sw,max</sub> of alpha-cypermethrin following single application of 10 g as/ha to winter cereals

| Location | Water body | PEC <sub>sw,max</sub> [ $\mu\text{g L}^{-1}$ ] and main entry route |                        |                        |                |                 |                |
|----------|------------|---------------------------------------------------------------------|------------------------|------------------------|----------------|-----------------|----------------|
|          |            | Step 3                                                              | Step 4                 |                        |                |                 |                |
|          |            | Edge-of-Field                                                       | 0mD <sup>a</sup> + 75N | 0mD <sup>a</sup> + 95N | 5mD            | 5mD + 50N       | 10mD           |
| D1       | ditch      | 0.056<br>Drift                                                      | 0.013<br>Drift         | 0.003<br>Drift         | 0.014<br>Drift | 0.007<br>Drift  | 0.008<br>Drift |
| D1       | stream     | 0.046<br>Drift                                                      | 0.011<br>Drift         | 0.002<br>Drift         | 0.017<br>Drift | 0.008<br>Drift  | 0.009<br>Drift |
| D2       | ditch      | 0.056<br>Drift                                                      | 0.013<br>Drift         | 0.003<br>Drift         | 0.014<br>Drift | 0.007<br>Drift  | 0.008<br>Drift |
| D2       | stream     | 0.047<br>Drift                                                      | 0.012<br>Drift         | 0.002<br>Drift         | 0.017<br>Drift | 0.008<br>Drift  | 0.009<br>Drift |
| D3       | ditch      | 0.052<br>Drift                                                      | 0.013<br>Drift         | 0.003<br>Drift         | 0.014<br>Drift | 0.007<br>Drift  | 0.008<br>Drift |
| D4       | pond       | 0.002<br>Drift                                                      | <0.001<br>Drift        | <0.001<br>Drift        | 0.002<br>Drift | <0.001<br>Drift | 0.001<br>Drift |
| D4       | stream     | 0.045<br>Drift                                                      | 0.011<br>Drift         | 0.002<br>Drift         | 0.016<br>Drift | 0.008<br>Drift  | 0.009<br>Drift |
| D5       | pond       | 0.002<br>Drift                                                      | <0.001<br>Drift        | <0.001<br>Drift        | 0.002<br>Drift | <0.001<br>Drift | 0.001<br>Drift |
| D5       | stream     | 0.048<br>Drift                                                      | 0.012<br>Drift         | 0.003<br>Drift         | 0.018<br>Drift | 0.009<br>Drift  | 0.009<br>Drift |
| D6       | ditch      | 0.052<br>Drift                                                      | 0.013<br>Drift         | 0.003<br>Drift         | 0.014<br>Drift | 0.007<br>Drift  | 0.008<br>Drift |
| R1       | pond       | 0.002<br>Drift                                                      | <0.001<br>Drift        | <0.001<br>Drift        | 0.002<br>Drift | <0.001<br>Drift | 0.001<br>Drift |
| R1       | stream     | 0.034<br>Drift                                                      | 0.009<br>Drift         | 0.002<br>Drift         | 0.013<br>Drift | 0.006<br>Drift  | 0.007<br>Drift |
| R3       | stream     | 0.048<br>Drift                                                      | 0.012<br>Drift         | 0.003<br>Drift         | 0.018<br>Drift | 0.009<br>Drift  | 0.009<br>Drift |
| R4       | stream     | 0.034<br>Drift                                                      | 0.009<br>Drift         | 0.002<br>Drift         | 0.013<br>Drift | 0.006<br>Drift  | 0.007<br>Drift |

<sup>a</sup> Standard Step 3 buffer according to FOCUS (d = 0.5 m, s = 1.0 m)

D = Drift mitigation by no-spray buffer zones [m]

N = Drift mitigation by drift reducing nozzles [%]

PEC<sub>sw,max</sub> of alpha-cypermethrin following twofold application of 10 g as/ha to winter cereals

| Location | Water body | PEC <sub>sw,max</sub> [ $\mu\text{g L}^{-1}$ ] and main entry route |                        |                        |                |                 |                |
|----------|------------|---------------------------------------------------------------------|------------------------|------------------------|----------------|-----------------|----------------|
|          |            | Step 3                                                              | Step 4                 |                        |                |                 |                |
|          |            | Edge-of-Field                                                       | 0mD <sup>a</sup> + 75N | 0mD <sup>a</sup> + 95N | 5mD            | 5mD + 50N       | 10mD           |
| D1       | ditch      | 0.053<br>Drift                                                      | 0.013<br>Drift         | 0.003<br>Drift         | 0.014<br>Drift | 0.007<br>Drift  | 0.007<br>Drift |
| D1       | stream     | 0.040<br>Drift                                                      | 0.010<br>Drift         | 0.002<br>Drift         | 0.014<br>Drift | 0.007<br>Drift  | 0.007<br>Drift |
| D2       | ditch      | 0.051<br>Drift                                                      | 0.013<br>Drift         | 0.002<br>Drift         | 0.013<br>Drift | 0.007<br>Drift  | 0.007<br>Drift |
| D2       | stream     | 0.041<br>Drift                                                      | 0.010<br>Drift         | 0.002<br>Drift         | 0.015<br>Drift | 0.007<br>Drift  | 0.008<br>Drift |
| D3       | ditch      | 0.046<br>Drift                                                      | 0.011<br>Drift         | 0.002<br>Drift         | 0.012<br>Drift | 0.006<br>Drift  | 0.006<br>Drift |
| D4       | pond       | 0.002<br>Drift                                                      | <0.001<br>Drift        | <0.001<br>Drift        | 0.002<br>Drift | <0.001<br>Drift | 0.001<br>Drift |
| D4       | stream     | 0.039<br>Drift                                                      | 0.010<br>Drift         | 0.002<br>Drift         | 0.014<br>Drift | 0.007<br>Drift  | 0.007<br>Drift |
| D5       | pond       | 0.002<br>Drift                                                      | <0.001<br>Drift        | <0.001<br>Drift        | 0.002<br>Drift | <0.001<br>Drift | 0.001<br>Drift |
| D5       | stream     | 0.042<br>Drift                                                      | 0.010<br>Drift         | 0.002<br>Drift         | 0.015<br>Drift | 0.007<br>Drift  | 0.008<br>Drift |
| D6       | ditch      | 0.051<br>Drift                                                      | 0.013<br>Drift         | 0.002<br>Drift         | 0.013<br>Drift | 0.007<br>Drift  | 0.007<br>Drift |
| R1       | pond       | 0.002<br>Drift                                                      | <0.001<br>Drift        | <0.001<br>Drift        | 0.002<br>Drift | <0.001<br>Drift | 0.001<br>Drift |
| R1       | stream     | 0.030<br>Drift                                                      | 0.007<br>Drift         | 0.001<br>Drift         | 0.010<br>Drift | 0.005<br>Drift  | 0.005<br>Drift |
| R3       | stream     | 0.042<br>Drift                                                      | 0.010<br>Drift         | 0.002<br>Drift         | 0.015<br>Drift | 0.007<br>Drift  | 0.008<br>Drift |
| R4       | stream     | 0.030<br>Drift                                                      | 0.007<br>Drift         | 0.001<br>Drift         | 0.010<br>Drift | 0.005<br>Drift  | 0.005<br>Drift |

<sup>a</sup> Standard Step 3 buffer according to FOCUS (d = 0.5 m, s = 1.0 m)

D = Drift mitigation by no-spray buffer zones [m]

N = Drift mitigation by drift reducing nozzles [%]

PEC<sub>sw,max</sub> of alpha-cypermethrin following single application of 10 g as/ha to winter oilseed rape

| Location | Water body | PEC <sub>sw,max</sub> [ $\mu\text{g L}^{-1}$ ] and main entry route |                        |                        |                |                 |                |
|----------|------------|---------------------------------------------------------------------|------------------------|------------------------|----------------|-----------------|----------------|
|          |            | Step 3                                                              | Step 4                 |                        |                |                 |                |
|          |            | Edge-of-Field                                                       | 0mD <sup>a</sup> + 75N | 0mD <sup>a</sup> + 95N | 5mD            | 5mD + 50N       | 10mD           |
| D2       | ditch      | 0.053<br>Drift                                                      | 0.013<br>Drift         | 0.003<br>Drift         | 0.014<br>Drift | 0.007<br>Drift  | 0.008<br>Drift |
| D2       | stream     | 0.047<br>Drift                                                      | 0.012<br>Drift         | 0.002<br>Drift         | 0.017<br>Drift | 0.008<br>Drift  | 0.009<br>Drift |
| D3       | ditch      | 0.052<br>Drift                                                      | 0.013<br>Drift         | 0.003<br>Drift         | 0.014<br>Drift | 0.007<br>Drift  | 0.008<br>Drift |
| D4       | pond       | 0.002<br>Drift                                                      | <0.001<br>Drift        | <0.001<br>Drift        | 0.002<br>Drift | <0.001<br>Drift | 0.001<br>Drift |
| D4       | stream     | 0.044<br>Drift                                                      | 0.011<br>Drift         | 0.002<br>Drift         | 0.016<br>Drift | 0.008<br>Drift  | 0.008<br>Drift |
| D5       | pond       | 0.002<br>Drift                                                      | <0.001<br>Drift        | <0.001<br>Drift        | 0.002<br>Drift | <0.001<br>Drift | 0.001<br>Drift |
| D5       | stream     | 0.044<br>Drift                                                      | 0.011<br>Drift         | 0.002<br>Drift         | 0.016<br>Drift | 0.008<br>Drift  | 0.009<br>Drift |
| R1       | pond       | 0.002<br>Drift                                                      | <0.001<br>Drift        | <0.001<br>Drift        | 0.002<br>Drift | <0.001<br>Drift | 0.001<br>Drift |
| R1       | stream     | 0.034<br>Drift                                                      | 0.009<br>Drift         | 0.002<br>Drift         | 0.013<br>Drift | 0.006<br>Drift  | 0.007<br>Drift |
| R3       | stream     | 0.048<br>Drift                                                      | 0.012<br>Drift         | 0.003<br>Drift         | 0.018<br>Drift | 0.009<br>Drift  | 0.009<br>Drift |

<sup>a</sup> Standard Step 3 buffer according to FOCUS (d = 0.5 m, s = 1.0 m)

D = Drift mitigation by no-spray buffer zones [m]

N = Drift mitigation by drift reducing nozzles [%]

PEC<sub>sw,max</sub> of alpha-cypermethrin following twofold application of 10 g as/ha to winter oilseed rape

| Location | Water body | PEC <sub>sw,max</sub> [ $\mu\text{g L}^{-1}$ ] and main entry route |                        |                        |                |                 |                |
|----------|------------|---------------------------------------------------------------------|------------------------|------------------------|----------------|-----------------|----------------|
|          |            | Step 3                                                              | Step 4                 |                        |                |                 |                |
|          |            | Edge-of-Field                                                       | 0mD <sup>a</sup> + 75N | 0mD <sup>a</sup> + 95N | 5mD            | 5mD + 50N       | 10mD           |
| D2       | ditch      | 0.047<br>Drift                                                      | 0.012<br>Drift         | 0.002<br>Drift         | 0.012<br>Drift | 0.006<br>Drift  | 0.006<br>Drift |
| D2       | stream     | 0.040<br>Drift                                                      | 0.010<br>Drift         | 0.002<br>Drift         | 0.014<br>Drift | 0.007<br>Drift  | 0.007<br>Drift |
| D3       | ditch      | 0.046<br>Drift                                                      | 0.011<br>Drift         | 0.002<br>Drift         | 0.012<br>Drift | 0.006<br>Drift  | 0.006<br>Drift |
| D4       | pond       | 0.002<br>Drift                                                      | <0.001<br>Drift        | <0.001<br>Drift        | 0.002<br>Drift | <0.001<br>Drift | 0.001<br>Drift |
| D4       | stream     | 0.038<br>Drift                                                      | 0.010<br>Drift         | 0.002<br>Drift         | 0.013<br>Drift | 0.007<br>Drift  | 0.007<br>Drift |
| D5       | pond       | 0.002<br>Drift                                                      | <0.001<br>Drift        | <0.001<br>Drift        | 0.002<br>Drift | <0.001<br>Drift | 0.001<br>Drift |
| D5       | stream     | 0.040<br>Drift                                                      | 0.010<br>Drift         | 0.002<br>Drift         | 0.014<br>Drift | 0.007<br>Drift  | 0.007<br>Drift |
| R1       | pond       | 0.002<br>Drift                                                      | <0.001<br>Drift        | <0.001<br>Drift        | 0.002<br>Drift | <0.001<br>Drift | 0.001<br>Drift |
| R1       | stream     | 0.029<br>Drift                                                      | 0.007<br>Drift         | 0.001<br>Drift         | 0.010<br>Drift | 0.005<br>Drift  | 0.005<br>Drift |
| R3       | stream     | 0.042<br>Drift                                                      | 0.010<br>Drift         | 0.002<br>Drift         | 0.015<br>Drift | 0.007<br>Drift  | 0.008<br>Drift |

<sup>a</sup> Standard Step 3 buffer according to FOCUS (d = 0.5 m, s = 1.0 m)

D = Drift mitigation by no-spray buffer zones [m]

N = Drift mitigation by drift reducing nozzles [%]

PEC<sub>sw,max</sub> of alpha-cypermethrin following single application of 10 g as/ha to vegetables, leafy, early application

| Location            | Water body | PEC <sub>sw,max</sub> [ $\mu\text{g L}^{-1}$ ] and main entry route |                        |                        |                |                 |                |
|---------------------|------------|---------------------------------------------------------------------|------------------------|------------------------|----------------|-----------------|----------------|
|                     |            | Step 3                                                              | Step 4                 |                        |                |                 |                |
|                     |            | Edge-of-Field                                                       | 0mD <sup>a</sup> + 75N | 0mD <sup>a</sup> + 95N | 5mD            | 5mD + 50N       | 10mD           |
| D3, 1 <sup>st</sup> | ditch      | 0.052<br>Drift                                                      | 0.013<br>Drift         | 0.003<br>Drift         | 0.014<br>Drift | 0.007<br>Drift  | 0.008<br>Drift |
| D3, 2 <sup>nd</sup> | ditch      | 0.052<br>Drift                                                      | 0.013<br>Drift         | 0.003<br>Drift         | 0.014<br>Drift | 0.007<br>Drift  | 0.008<br>Drift |
| D4                  | pond       | 0.002<br>Drift                                                      | <0.001<br>Drift        | <0.001<br>Drift        | 0.002<br>Drift | <0.001<br>Drift | 0.001<br>Drift |
| D4                  | stream     | 0.041<br>Drift                                                      | 0.010<br>Drift         | 0.002<br>Drift         | 0.015<br>Drift | 0.007<br>Drift  | 0.008<br>Drift |
| D6                  | ditch      | 0.051<br>Drift                                                      | 0.013<br>Drift         | 0.003<br>Drift         | 0.014<br>Drift | 0.007<br>Drift  | 0.007<br>Drift |
| R1, 1 <sup>st</sup> | pond       | 0.002<br>Drift                                                      | <0.001<br>Drift        | <0.001<br>Drift        | 0.002<br>Drift | <0.001<br>Drift | 0.001<br>Drift |
| R1, 1 <sup>st</sup> | stream     | 0.034<br>Drift                                                      | 0.009<br>Drift         | 0.002<br>Drift         | 0.013<br>Drift | 0.006<br>Drift  | 0.007<br>Drift |
| R1, 2 <sup>nd</sup> | pond       | 0.002<br>Drift                                                      | <0.001<br>Drift        | <0.001<br>Drift        | 0.002<br>Drift | <0.001<br>Drift | 0.001<br>Drift |
| R1, 2 <sup>nd</sup> | stream     | 0.034<br>Drift                                                      | 0.009<br>Drift         | 0.002<br>Drift         | 0.013<br>Drift | 0.006<br>Drift  | 0.007<br>Drift |
| R2, 1 <sup>st</sup> | stream     | 0.045<br>Drift                                                      | 0.011<br>Drift         | 0.002<br>Drift         | 0.017<br>Drift | 0.008<br>Drift  | 0.009<br>Drift |
| R2, 2 <sup>nd</sup> | stream     | 0.046<br>Drift                                                      | 0.012<br>Drift         | 0.002<br>Drift         | 0.017<br>Drift | 0.008<br>Drift  | 0.009<br>Drift |
| R3, 1 <sup>st</sup> | stream     | 0.048<br>Drift                                                      | 0.012<br>Drift         | 0.003<br>Drift         | 0.018<br>Drift | 0.009<br>Drift  | 0.009<br>Drift |
| R3, 2 <sup>nd</sup> | stream     | 0.048<br>Drift                                                      | 0.012<br>Drift         | 0.003<br>Drift         | 0.018<br>Drift | 0.009<br>Drift  | 0.009<br>Drift |
| R4, 1 <sup>st</sup> | stream     | 0.034<br>Drift                                                      | 0.009<br>Drift         | 0.002<br>Drift         | 0.013<br>Drift | 0.006<br>Drift  | 0.007<br>Drift |
| R4, 2 <sup>nd</sup> | stream     | 0.034<br>Drift                                                      | 0.009<br>Drift         | 0.002<br>Drift         | 0.012<br>Drift | 0.006<br>Drift  | 0.007<br>Drift |

<sup>a</sup> Standard Step 3 buffer according to FOCUS (d = 0.5 m, s = 1.0 m)

D = Drift mitigation by no-spray buffer zones [m]

N = Drift mitigation by drift reducing nozzles [%]

1<sup>st</sup> = 1<sup>st</sup> season vegetables leafy

2<sup>nd</sup> = 2<sup>nd</sup> season vegetables leafy

PEC<sub>sw,max</sub> of alpha-cypermethrin following single application of 10 g as/ha to vegetables, leafy, late application

| Location            | Water body | PEC <sub>sw,max</sub> [ $\mu\text{g L}^{-1}$ ] and main entry route |                        |                        |                |                 |                |
|---------------------|------------|---------------------------------------------------------------------|------------------------|------------------------|----------------|-----------------|----------------|
|                     |            | Step 3                                                              | Step 4                 |                        |                |                 |                |
|                     |            | Edge-of-Field                                                       | 0mD <sup>a</sup> + 75N | 0mD <sup>a</sup> + 95N | 5mD            | 5mD + 50N       | 10mD           |
| D3, 1 <sup>st</sup> | ditch      | 0.052<br>Drift                                                      | 0.013<br>Drift         | 0.003<br>Drift         | 0.014<br>Drift | 0.007<br>Drift  | 0.008<br>Drift |
| D3, 2 <sup>nd</sup> | ditch      | 0.052<br>Drift                                                      | 0.013<br>Drift         | 0.003<br>Drift         | 0.014<br>Drift | 0.007<br>Drift  | 0.008<br>Drift |
| D4                  | pond       | 0.002<br>Drift                                                      | <0.001<br>Drift        | <0.001<br>Drift        | 0.002<br>Drift | <0.001<br>Drift | 0.001<br>Drift |
| D4                  | stream     | 0.037<br>Drift                                                      | 0.009<br>Drift         | 0.002<br>Drift         | 0.014<br>Drift | 0.007<br>Drift  | 0.007<br>Drift |
| D6                  | ditch      | 0.051<br>Drift                                                      | 0.013<br>Drift         | 0.003<br>Drift         | 0.014<br>Drift | 0.007<br>Drift  | 0.007<br>Drift |
| R1, 1 <sup>st</sup> | pond       | 0.002<br>Drift                                                      | <0.001<br>Drift        | <0.001<br>Run-off      | 0.002<br>Drift | <0.001<br>Drift | 0.001<br>Drift |
| R1, 1 <sup>st</sup> | stream     | 0.034<br>Drift                                                      | 0.009<br>Drift         | 0.002<br>Drift         | 0.013<br>Drift | 0.006<br>Drift  | 0.007<br>Drift |
| R1, 2 <sup>nd</sup> | pond       | 0.002<br>Drift                                                      | <0.001<br>Drift        | <0.001<br>Drift        | 0.002<br>Drift | <0.001<br>Drift | 0.001<br>Drift |
| R1, 2 <sup>nd</sup> | stream     | 0.034<br>Drift                                                      | 0.009<br>Drift         | 0.002<br>Drift         | 0.013<br>Drift | 0.006<br>Drift  | 0.007<br>Drift |
| R2, 1 <sup>st</sup> | stream     | 0.046<br>Drift                                                      | 0.012<br>Drift         | 0.002<br>Drift         | 0.017<br>Drift | 0.008<br>Drift  | 0.009<br>Drift |
| R2, 2 <sup>nd</sup> | stream     | 0.046<br>Drift                                                      | 0.011<br>Drift         | 0.002<br>Drift         | 0.017<br>Drift | 0.008<br>Drift  | 0.009<br>Drift |
| R3, 1 <sup>st</sup> | stream     | 0.048<br>Drift                                                      | 0.012<br>Drift         | 0.003<br>Drift         | 0.018<br>Drift | 0.009<br>Drift  | 0.009<br>Drift |
| R3, 2 <sup>nd</sup> | stream     | 0.048<br>Drift                                                      | 0.012<br>Drift         | 0.003<br>Drift         | 0.018<br>Drift | 0.009<br>Drift  | 0.009<br>Drift |
| R4, 1 <sup>st</sup> | stream     | 0.034<br>Drift                                                      | 0.009<br>Drift         | 0.002<br>Drift         | 0.013<br>Drift | 0.006<br>Drift  | 0.007<br>Drift |
| R4, 2 <sup>nd</sup> | stream     | 0.034<br>Drift                                                      | 0.009<br>Drift         | 0.002<br>Drift         | 0.013<br>Drift | 0.006<br>Drift  | 0.007<br>Drift |

<sup>a</sup> Standard Step 3 buffer according to FOCUS (d = 0.5 m, s = 1.0 m)

D = Drift mitigation by no-spray buffer zones [m]

N = Drift mitigation by drift reducing nozzles [%]

1<sup>st</sup> = 1<sup>st</sup> season vegetables leafy

2<sup>nd</sup> = 2<sup>nd</sup> season vegetables leafy

PEC<sub>sw,max</sub> of alpha-cypermethrin following twofold application of 10 g as/ha to vegetables, leafy, early application

| Location            | Water body | PEC <sub>sw,max</sub> [ $\mu\text{g L}^{-1}$ ] and main entry route |                        |                        |                |                 |                |
|---------------------|------------|---------------------------------------------------------------------|------------------------|------------------------|----------------|-----------------|----------------|
|                     |            | Step 3                                                              | Step 4                 |                        |                |                 |                |
|                     |            | Edge-of-Field                                                       | 0mD <sup>a</sup> + 75N | 0mD <sup>a</sup> + 95N | 5mD            | 5mD + 50N       | 10mD           |
| D3, 1 <sup>st</sup> | ditch      | 0.046<br>Drift                                                      | 0.011<br>Drift         | 0.002<br>Drift         | 0.012<br>Drift | 0.006<br>Drift  | 0.006<br>Drift |
| D3, 2 <sup>nd</sup> | ditch      | 0.046<br>Drift                                                      | 0.011<br>Drift         | 0.002<br>Drift         | 0.012<br>Drift | 0.006<br>Drift  | 0.006<br>Drift |
| D4                  | pond       | 0.002<br>Drift                                                      | <0.001<br>Drift        | <0.001<br>Drift        | 0.002<br>Drift | <0.001<br>Drift | 0.001<br>Drift |
| D4                  | stream     | 0.036<br>Drift                                                      | 0.009<br>Drift         | 0.002<br>Drift         | 0.013<br>Drift | 0.006<br>Drift  | 0.007<br>Drift |
| D6                  | ditch      | 0.044<br>Drift                                                      | 0.011<br>Drift         | 0.002<br>Drift         | 0.012<br>Drift | 0.006<br>Drift  | 0.006<br>Drift |
| R1, 1 <sup>st</sup> | pond       | 0.002<br>Drift                                                      | <0.001<br>Drift        | <0.001<br>Drift        | 0.002<br>Drift | <0.001<br>Drift | 0.001<br>Drift |
| R1, 1 <sup>st</sup> | stream     | 0.029<br>Drift                                                      | 0.007<br>Drift         | 0.001<br>Drift         | 0.010<br>Drift | 0.005<br>Drift  | 0.005<br>Drift |
| R1, 2 <sup>nd</sup> | pond       | 0.002<br>Drift                                                      | <0.001<br>Drift        | <0.001<br>Run-off      | 0.002<br>Drift | <0.001<br>Drift | 0.001<br>Drift |
| R1, 2 <sup>nd</sup> | stream     | 0.030<br>Drift                                                      | 0.007<br>Drift         | 0.001<br>Drift         | 0.010<br>Drift | 0.005<br>Drift  | 0.005<br>Drift |
| R2, 1 <sup>st</sup> | stream     | 0.039<br>Drift                                                      | 0.010<br>Drift         | 0.002<br>Drift         | 0.014<br>Drift | 0.007<br>Drift  | 0.007<br>Drift |
| R2, 2 <sup>nd</sup> | stream     | 0.040<br>Drift                                                      | 0.010<br>Drift         | 0.002<br>Drift         | 0.014<br>Drift | 0.007<br>Drift  | 0.007<br>Drift |
| R3, 1 <sup>st</sup> | stream     | 0.041<br>Drift                                                      | 0.010<br>Drift         | 0.002<br>Drift         | 0.015<br>Drift | 0.007<br>Drift  | 0.008<br>Drift |
| R3, 2 <sup>nd</sup> | stream     | 0.042<br>Drift                                                      | 0.010<br>Drift         | 0.002<br>Drift         | 0.015<br>Drift | 0.007<br>Drift  | 0.008<br>Drift |
| R4, 1 <sup>st</sup> | stream     | 0.030<br>Drift                                                      | 0.007<br>Drift         | 0.001<br>Drift         | 0.010<br>Drift | 0.005<br>Drift  | 0.005<br>Drift |
| R4, 2 <sup>nd</sup> | stream     | 0.029<br>Drift                                                      | 0.007<br>Drift         | 0.001<br>Drift         | 0.010<br>Drift | 0.005<br>Drift  | 0.005<br>Drift |

<sup>a</sup> Standard Step 3 buffer according to FOCUS (d = 0.5 m, s = 1.0 m)

D = Drift mitigation by no-spray buffer zones [m]

N = Drift mitigation by drift reducing nozzles [%]

1<sup>st</sup> = 1<sup>st</sup> season vegetables leafy

2<sup>nd</sup> = 2<sup>nd</sup> season vegetables leafy



PEC<sub>sw,max</sub> of alpha-cypermethrin following twofold application of 10 g as/ha to vegetables, leafy, late application

| Location            | Water body | PEC <sub>sw,max</sub> [ $\mu\text{g L}^{-1}$ ] and main entry route |                        |                        |                |                 |                |
|---------------------|------------|---------------------------------------------------------------------|------------------------|------------------------|----------------|-----------------|----------------|
|                     |            | Step 3                                                              | Step 4                 |                        |                |                 |                |
|                     |            | Edge-of-Field                                                       | 0mD <sup>a</sup> + 75N | 0mD <sup>a</sup> + 95N | 5mD            | 5mD + 50N       | 10mD           |
| D3, 1 <sup>st</sup> | ditch      | 0.046<br>Drift                                                      | 0.011<br>Drift         | 0.002<br>Drift         | 0.012<br>Drift | 0.006<br>Drift  | 0.006<br>Drift |
| D3, 2 <sup>nd</sup> | ditch      | 0.045<br>Drift                                                      | 0.011<br>Drift         | 0.002<br>Drift         | 0.012<br>Drift | 0.006<br>Drift  | 0.006<br>Drift |
| D4                  | pond       | 0.002<br>Drift                                                      | <0.001<br>Drift        | <0.001<br>Drift        | 0.002<br>Drift | <0.001<br>Drift | 0.001<br>Drift |
| D4                  | stream     | 0.035<br>Drift                                                      | 0.009<br>Drift         | 0.002<br>Drift         | 0.012<br>Drift | 0.006<br>Drift  | 0.006<br>Drift |
| D6                  | ditch      | 0.045<br>Drift                                                      | 0.011<br>Drift         | 0.002<br>Drift         | 0.012<br>Drift | 0.006<br>Drift  | 0.006<br>Drift |
| R1, 1 <sup>st</sup> | pond       | 0.002<br>Drift                                                      | <0.001<br>Drift        | <0.001<br>Drift        | 0.002<br>Drift | <0.001<br>Drift | 0.001<br>Drift |
| R1, 1 <sup>st</sup> | stream     | 0.030<br>Drift                                                      | 0.007<br>Drift         | 0.001<br>Drift         | 0.010<br>Drift | 0.005<br>Drift  | 0.005<br>Drift |
| R1, 2 <sup>nd</sup> | pond       | 0.002<br>Drift                                                      | <0.001<br>Drift        | <0.001<br>Run-off      | 0.002<br>Drift | <0.001<br>Drift | 0.001<br>Drift |
| R1, 2 <sup>nd</sup> | stream     | 0.030<br>Drift                                                      | 0.007<br>Drift         | 0.001<br>Drift         | 0.010<br>Drift | 0.005<br>Drift  | 0.005<br>Drift |
| R2, 1 <sup>st</sup> | stream     | 0.040<br>Drift                                                      | 0.010<br>Drift         | 0.002<br>Drift         | 0.014<br>Drift | 0.007<br>Drift  | 0.007<br>Drift |
| R2, 2 <sup>nd</sup> | stream     | 0.039<br>Drift                                                      | 0.010<br>Drift         | 0.002<br>Drift         | 0.014<br>Drift | 0.007<br>Drift  | 0.007<br>Drift |
| R3, 1 <sup>st</sup> | stream     | 0.042<br>Drift                                                      | 0.010<br>Drift         | 0.002<br>Drift         | 0.015<br>Drift | 0.007<br>Drift  | 0.008<br>Drift |
| R3, 2 <sup>nd</sup> | stream     | 0.042<br>Drift                                                      | 0.010<br>Drift         | 0.002<br>Drift         | 0.015<br>Drift | 0.007<br>Drift  | 0.008<br>Drift |
| R4, 1 <sup>st</sup> | stream     | 0.030<br>Drift                                                      | 0.007<br>Drift         | 0.001<br>Drift         | 0.010<br>Drift | 0.005<br>Drift  | 0.005<br>Drift |
| R4, 2 <sup>nd</sup> | stream     | 0.030<br>Drift                                                      | 0.007<br>Drift         | 0.001<br>Drift         | 0.010<br>Drift | 0.005<br>Drift  | 0.005<br>Drift |

<sup>a</sup> Standard Step 3 buffer according to FOCUS (d = 0.5 m, s = 1.0 m)

D = Drift mitigation by no-spray buffer zones [m]

N = Drift mitigation by drift reducing nozzles [%]

1<sup>st</sup> = 1<sup>st</sup> season vegetables leafy

2<sup>nd</sup> = 2<sup>nd</sup> season vegetables leafy

PEC<sub>sw,max</sub> of alpha-cypermethrin following single application of 20 g as/ha to vegetables, leafy, early application

| Location            | Water body | PEC <sub>sw,max</sub> [ $\mu\text{g L}^{-1}$ ] and main entry route |                        |                |                 |                |                |
|---------------------|------------|---------------------------------------------------------------------|------------------------|----------------|-----------------|----------------|----------------|
|                     |            | Step 3                                                              | Step 4                 |                |                 |                |                |
|                     |            | Edge-of-Field                                                       | 0mD + 95N <sup>a</sup> | 5mD            | 5mD + 75N       | 10mD + 50N     | 15mD           |
| D3, 1 <sup>st</sup> | ditch      | 0.104<br>Drift                                                      | 0.005<br>Drift         | 0.028<br>Drift | 0.007<br>Drift  | 0.008<br>Drift | 0.010<br>Drift |
| D3, 2 <sup>nd</sup> | ditch      | 0.104<br>Drift                                                      | 0.005<br>Drift         | 0.028<br>Drift | 0.007<br>Drift  | 0.008<br>Drift | 0.010<br>Drift |
| D4                  | pond       | 0.004<br>Drift                                                      | <0.001<br>Drift        | 0.003<br>Drift | <0.001<br>Drift | 0.001<br>Drift | 0.002<br>Drift |
| D4                  | stream     | 0.081<br>Drift                                                      | 0.004<br>Drift         | 0.030<br>Drift | 0.007<br>Drift  | 0.008<br>Drift | 0.011<br>Drift |
| D6                  | ditch      | 0.101<br>Drift                                                      | 0.005<br>Drift         | 0.027<br>Drift | 0.007<br>Drift  | 0.007<br>Drift | 0.010<br>Drift |
| R1, 1 <sup>st</sup> | pond       | 0.004<br>Drift                                                      | <0.001<br>Drift        | 0.003<br>Drift | <0.001<br>Drift | 0.001<br>Drift | 0.002<br>Drift |
| R1, 1 <sup>st</sup> | stream     | 0.068<br>Drift                                                      | 0.003<br>Drift         | 0.025<br>Drift | 0.006<br>Drift  | 0.007<br>Drift | 0.009<br>Drift |
| R1, 2 <sup>nd</sup> | pond       | 0.004<br>Drift                                                      | <0.001<br>Drift        | 0.003<br>Drift | <0.001<br>Drift | 0.001<br>Drift | 0.002<br>Drift |
| R1, 2 <sup>nd</sup> | stream     | 0.069<br>Drift                                                      | 0.003<br>Drift         | 0.025<br>Drift | 0.006<br>Drift  | 0.007<br>Drift | 0.009<br>Drift |
| R2, 1 <sup>st</sup> | stream     | 0.090<br>Drift                                                      | 0.004<br>Drift         | 0.033<br>Drift | 0.008<br>Drift  | 0.009<br>Drift | 0.012<br>Drift |
| R2, 2 <sup>nd</sup> | stream     | 0.092<br>Drift                                                      | 0.005<br>Drift         | 0.033<br>Drift | 0.008<br>Drift  | 0.009<br>Drift | 0.012<br>Drift |
| R3, 1 <sup>st</sup> | stream     | 0.096<br>Drift                                                      | 0.005<br>Drift         | 0.035<br>Drift | 0.009<br>Drift  | 0.009<br>Drift | 0.013<br>Drift |
| R3, 2 <sup>nd</sup> | stream     | 0.096<br>Drift                                                      | 0.005<br>Drift         | 0.035<br>Drift | 0.009<br>Drift  | 0.009<br>Drift | 0.013<br>Drift |
| R4, 1 <sup>st</sup> | stream     | 0.068<br>Drift                                                      | 0.003<br>Drift         | 0.025<br>Drift | 0.006<br>Drift  | 0.007<br>Drift | 0.009<br>Drift |
| R4, 2 <sup>nd</sup> | stream     | 0.068<br>Drift                                                      | 0.003<br>Drift         | 0.025<br>Drift | 0.006<br>Drift  | 0.007<br>Drift | 0.009<br>Drift |

<sup>a</sup> Standard Step 3 buffer according to FOCUS (d = 0.5 m, s = 1.0 m)

D = Drift mitigation by no-spray buffer zones [m]

N = Drift mitigation by drift reducing nozzles [%]

1<sup>st</sup> = 1<sup>st</sup> season vegetables leafy

2<sup>nd</sup> = 2<sup>nd</sup> season vegetables leafy

PEC<sub>sw,max</sub> of alpha-cypermethrin following single application of 20 g as/ha to vegetables, leafy, late application

| Location            | Water body | PEC <sub>sw,max</sub> [ $\mu\text{g L}^{-1}$ ] and main entry route |                        |                |                 |                |                |
|---------------------|------------|---------------------------------------------------------------------|------------------------|----------------|-----------------|----------------|----------------|
|                     |            | Step 3                                                              | Step 4                 |                |                 |                |                |
|                     |            | Edge-of-Field                                                       | 0mD + 95N <sup>a</sup> | 5mD            | 5mD + 75N       | 10mD + 50N     | 15mD           |
| D3, 1 <sup>st</sup> | ditch      | 0.104<br>Drift                                                      | 0.005<br>Drift         | 0.028<br>Drift | 0.007<br>Drift  | 0.008<br>Drift | 0.010<br>Drift |
| D3, 2 <sup>nd</sup> | ditch      | 0.103<br>Drift                                                      | 0.005<br>Drift         | 0.028<br>Drift | 0.007<br>Drift  | 0.008<br>Drift | 0.010<br>Drift |
| D4                  | pond       | 0.004<br>Drift                                                      | <0.001<br>Drift        | 0.003<br>Drift | <0.001<br>Drift | 0.001<br>Drift | 0.002<br>Drift |
| D4                  | stream     | 0.074<br>Drift                                                      | 0.004<br>Drift         | 0.027<br>Drift | 0.007<br>Drift  | 0.007<br>Drift | 0.010<br>Drift |
| D6                  | ditch      | 0.103<br>Drift                                                      | 0.005<br>Drift         | 0.028<br>Drift | 0.007<br>Drift  | 0.007<br>Drift | 0.010<br>Drift |
| R1, 1 <sup>st</sup> | pond       | 0.004<br>Drift                                                      | <0.001<br>Run-off      | 0.003<br>Drift | <0.001<br>Drift | 0.001<br>Drift | 0.002<br>Drift |
| R1, 1 <sup>st</sup> | stream     | 0.069<br>Drift                                                      | 0.003<br>Drift         | 0.025<br>Drift | 0.006<br>Drift  | 0.007<br>Drift | 0.009<br>Drift |
| R1, 2 <sup>nd</sup> | pond       | 0.004<br>Drift                                                      | <0.001<br>Drift        | 0.003<br>Drift | <0.001<br>Drift | 0.001<br>Drift | 0.002<br>Drift |
| R1, 2 <sup>nd</sup> | stream     | 0.069<br>Drift                                                      | 0.003<br>Drift         | 0.025<br>Drift | 0.006<br>Drift  | 0.007<br>Drift | 0.009<br>Drift |
| R2, 1 <sup>st</sup> | stream     | 0.092<br>Drift                                                      | 0.005<br>Drift         | 0.033<br>Drift | 0.008<br>Drift  | 0.009<br>Drift | 0.012<br>Drift |
| R2, 2 <sup>nd</sup> | stream     | 0.091<br>Drift                                                      | 0.005<br>Drift         | 0.035<br>Drift | 0.008<br>Drift  | 0.009<br>Drift | 0.012<br>Drift |
| R3, 1 <sup>st</sup> | stream     | 0.097<br>Drift                                                      | 0.005<br>Drift         | 0.035<br>Drift | 0.009<br>Drift  | 0.009<br>Drift | 0.013<br>Drift |
| R3, 2 <sup>nd</sup> | stream     | 0.096<br>Drift                                                      | 0.005<br>Drift         | 0.035<br>Drift | 0.009<br>Drift  | 0.009<br>Drift | 0.013<br>Drift |
| R4, 1 <sup>st</sup> | stream     | 0.068<br>Drift                                                      | 0.003<br>Drift         | 0.025<br>Drift | 0.006<br>Drift  | 0.007<br>Drift | 0.009<br>Drift |
| R4, 2 <sup>nd</sup> | stream     | 0.069<br>Drift                                                      | 0.003<br>Drift         | 0.025<br>Drift | 0.006<br>Drift  | 0.007<br>Drift | 0.009<br>Drift |

<sup>a</sup> Standard Step 3 buffer according to FOCUS (d = 0.5 m, s = 1.0 m)

D = Drift mitigation by no-spray buffer zones [m]

N = Drift mitigation by drift reducing nozzles [%]

1<sup>st</sup> = 1<sup>st</sup> season vegetables leafy

2<sup>nd</sup> = 2<sup>nd</sup> season vegetables leafy

**FOCUS Step 3-4 PEC's in sediment**

PEC<sub>SED,max</sub> of alpha-cypermethrin after application of 10 g as/ha to spring cereals

| Location | Water body | PEC <sub>sed,max</sub> [ $\mu\text{g kg}^{-1}$ ] |          |
|----------|------------|--------------------------------------------------|----------|
|          |            | Spring cereals                                   |          |
|          |            | Single                                           | Multiple |
| D1       | ditch      | 0.355                                            | 0.491    |
| D1       | stream     | 0.228                                            | 0.213    |
| D3       | ditch      | 0.266                                            | 0.355    |
| D4       | pond       | 0.029                                            | 0.048    |
| D4       | stream     | 0.140                                            | 0.148    |
| D5       | pond       | 0.031                                            | 0.048    |
| D5       | stream     | 0.070                                            | 0.153    |
| R4       | stream     | 0.465                                            | 0.518    |

PEC<sub>SED,max</sub> of alpha-cypermethrin after application of 10 g as/ha to winter cereals

| Location | Water body | PEC <sub>sed,max</sub> [ $\mu\text{g kg}^{-1}$ ] |          |
|----------|------------|--------------------------------------------------|----------|
|          |            | Winter cereals                                   |          |
|          |            | Single                                           | Multiple |
| D1       | ditch      | 0.366                                            | 0.630    |
| D1       | stream     | 0.228                                            | 0.270    |
| D2       | ditch      | 0.358                                            | 0.583    |
| D2       | stream     | 0.319                                            | 0.419    |
| D3       | ditch      | 0.259                                            | 0.292    |
| D4       | pond       | 0.029                                            | 0.048    |
| D4       | stream     | 0.149                                            | 0.151    |
| D5       | pond       | 0.031                                            | 0.049    |
| D5       | stream     | 0.177                                            | 0.172    |
| D6       | ditch      | 0.356                                            | 0.569    |
| R1       | pond       | 0.035                                            | 0.058    |
| R1       | stream     | 0.183                                            | 0.331    |
| R3       | stream     | 0.169                                            | 0.154    |
| R4       | stream     | 0.350                                            | 0.412    |

PEC<sub>SED,max</sub> of alpha-cypermethrin after application of 10 g as/ha to winter oilseed rape

| Location | Water body | PEC <sub>sed,max</sub> [ $\mu\text{g kg}^{-1}$ ] |          |
|----------|------------|--------------------------------------------------|----------|
|          |            | Winter oilseed rape                              |          |
|          |            | Single                                           | Multiple |
| D2       | ditch      | 0.368                                            | 0.475    |
| D2       | stream     | 0.328                                            | 0.285    |
| D3       | ditch      | 0.258                                            | 0.292    |
| D4       | pond       | 0.031                                            | 0.050    |
| D4       | stream     | 0.100                                            | 0.117    |
| D5       | pond       | 0.033                                            | 0.052    |
| D5       | stream     | 0.056                                            | 0.080    |
| R1       | pond       | 0.033                                            | 0.057    |
| R1       | stream     | 0.150                                            | 0.338    |
| R3       | stream     | 0.150                                            | 0.227    |

PEC<sub>SED,max</sub> of alpha-cypermethrin after application of 10 g as/ha to vegetables, leafy, early application

| Location            | Water body | PEC <sub>sed,max</sub> [ $\mu\text{g kg}^{-1}$ ] |          |
|---------------------|------------|--------------------------------------------------|----------|
|                     |            | Vegetables, leafy                                |          |
|                     |            | Single                                           | Multiple |
| D3, 1 <sup>st</sup> | ditch      | 0.251                                            | 0.300    |
| D3, 2 <sup>nd</sup> | ditch      | 0.256                                            | 0.311    |
| D4                  | pond       | 0.032                                            | 0.051    |
| D4                  | stream     | 0.048                                            | 0.054    |
| D6,                 | ditch      | 0.153                                            | 0.158    |
| R1, 1 <sup>st</sup> | pond       | 0.055                                            | 0.105    |
| R1, 1 <sup>st</sup> | stream     | 1.215                                            | 2.417    |
| R1, 2 <sup>nd</sup> | pond       | 0.052                                            | 0.102    |
| R1, 2 <sup>nd</sup> | stream     | 1.076                                            | 2.282    |
| R2, 1 <sup>st</sup> | stream     | 0.305                                            | 0.586    |
| R2, 2 <sup>nd</sup> | stream     | 1.486                                            | 3.050    |
| R3, 1 <sup>st</sup> | stream     | 0.759                                            | 1.533    |
| R3, 2 <sup>nd</sup> | stream     | 0.216                                            | 0.388    |
| R4, 1 <sup>st</sup> | stream     | 0.974                                            | 1.954    |
| R4, 2 <sup>nd</sup> | Stream     | 0.296                                            | 0.645    |

1<sup>st</sup> = 1<sup>st</sup> season vegetables leafy

2<sup>nd</sup> = 2<sup>nd</sup> season vegetables leafy

PEC<sub>SED,max</sub> of alpha-cypermethrin after application of 10 g as/ha to vegetables, leafy, late application

| Location            | Water body | PEC <sub>sed,max</sub> [ $\mu\text{g kg}^{-1}$ ] |          |
|---------------------|------------|--------------------------------------------------|----------|
|                     |            | Vegetables, leafy                                |          |
|                     |            | Single                                           | Multiple |
| D3, 1 <sup>st</sup> | ditch      | 0.253                                            | 0.295    |
| D3, 2 <sup>nd</sup> | ditch      | 0.221                                            | 0.264    |
| D4                  | pond       | 0.030                                            | 0.049    |
| D4                  | stream     | 0.026                                            | 0.045    |
| D6,                 | ditch      | 0.200                                            | 0.174    |
| R1, 1 <sup>st</sup> | pond       | 0.054                                            | 0.082    |
| R1, 1 <sup>st</sup> | stream     | 0.720                                            | 1.455    |
| R1, 2 <sup>nd</sup> | pond       | 0.060                                            | 0.136    |
| R1, 2 <sup>nd</sup> | stream     | 1.155                                            | 2.839    |
| R2, 1 <sup>st</sup> | stream     | 0.142                                            | 0.339    |
| R2, 2 <sup>nd</sup> | stream     | 2.663                                            | 5.388    |
| R3, 1 <sup>st</sup> | stream     | 0.764                                            | 2.318    |
| R3, 2 <sup>nd</sup> | stream     | 1.276                                            | 1.681    |
| R4, 1 <sup>st</sup> | stream     | 1.132                                            | 2.412    |
| R4, 2 <sup>nd</sup> | Stream     | 1.167                                            | 2.620    |

1<sup>st</sup> = 1<sup>st</sup> season vegetables leafy

2<sup>nd</sup> = 2<sup>nd</sup> season vegetables leafy

PEC<sub>SED,max</sub> of alpha-cypermethrin after application of 20 g as/ha to vegetables, leafy, early application

| Location            | Water body | PEC <sub>sed,max</sub> [ $\mu\text{g kg}^{-1}$ ] |
|---------------------|------------|--------------------------------------------------|
|                     |            | Vegetables, leafy                                |
|                     |            | Single                                           |
| D3, 1 <sup>st</sup> | ditch      | 0.500                                            |
| D3, 2 <sup>nd</sup> | ditch      | 0.511                                            |
| D4                  | pond       | 0.063                                            |
| D4                  | stream     | 0.096                                            |
| D6                  | ditch      | 0.304                                            |
| R1, 1 <sup>st</sup> | pond       | 0.109                                            |
| R1, 1 <sup>st</sup> | stream     | 2.430                                            |
| R1, 2 <sup>nd</sup> | pond       | 0.104                                            |
| R1, 2 <sup>nd</sup> | stream     | 2.152                                            |
| R2, 1 <sup>st</sup> | stream     | 0.611                                            |
| R2, 2 <sup>nd</sup> | stream     | 2.973                                            |
| R3, 1 <sup>st</sup> | stream     | 1.519                                            |
| R3, 2 <sup>nd</sup> | stream     | 0.431                                            |
| R4, 1 <sup>st</sup> | stream     | 1.949                                            |
| R4, 2 <sup>nd</sup> | stream     | 0.592                                            |

1<sup>st</sup> = 1<sup>st</sup> season vegetables leafy

2<sup>nd</sup> = 2<sup>nd</sup> season vegetables leafy

PEC<sub>SED,max</sub> of alpha-cypermethrin after application of 20 g as/ha to vegetables, leafy, late application

| Location            | Water body | PEC <sub>sed,max</sub> [ $\mu\text{g kg}^{-1}$ ] |
|---------------------|------------|--------------------------------------------------|
|                     |            | Vegetables, leafy                                |
|                     |            | Single                                           |
| D3, 1 <sup>st</sup> | ditch      | 0.504                                            |
| D3, 2 <sup>nd</sup> | ditch      | 0.441                                            |
| D4                  | pond       | 0.060                                            |
| D4                  | stream     | 0.053                                            |
| D6                  | ditch      | 0.400                                            |
| R1, 1 <sup>st</sup> | pond       | 0.107                                            |
| R1, 1 <sup>st</sup> | stream     | 1.439                                            |
| R1, 2 <sup>nd</sup> | pond       | 0.121                                            |
| R1, 2 <sup>nd</sup> | stream     | 2.309                                            |
| R2, 1 <sup>st</sup> | stream     | 0.283                                            |
| R2, 2 <sup>nd</sup> | stream     | 5.326                                            |
| R3, 1 <sup>st</sup> | stream     | 1.528                                            |
| R3, 2 <sup>nd</sup> | stream     | 2.552                                            |
| R4, 1 <sup>st</sup> | stream     | 2.265                                            |
| R4, 2 <sup>nd</sup> | stream     | 2.335                                            |

1<sup>st</sup> = 1<sup>st</sup> season vegetables leafy

2<sup>nd</sup> = 2<sup>nd</sup> season vegetables leafy

Metabolite **M310I017**

Parameters used in FOCUSsw step 1 and 2

Molecular weight: 432.3  
 Soil or water metabolite: soil metabolite  
 Koc: 234901 mL/g (geometric mean)  
 DT<sub>50</sub> soil : 11.8 days (geomean lab DT<sub>50</sub>'s)  
 DT<sub>50</sub> water/sediment system : 1000 days (conservative assumption)  
 DT<sub>50</sub> water : 1000 days (conservative assumption)  
 DT<sub>50</sub> sediment : 1000 days (conservative assumption)  
 Crop interception (%): minimal crop cover  
 Maximum occurrence observed (% molar basis with respect to the parent)  
 Total Water and Sediment: 10<sup>-05</sup> %  
 Soil: 8.4%

Parameters used in FOCUSsw step 3 (if performed)

/

Application rate

Vegetables, leafy (FOCUS Step 1-2)  
 Crop and growth stage: minimal crop cover  
 Number of applications: 2  
 Interval : 7 days  
 Application rate(s): 10 g a.s./ha  
 Application window: March-May, North and South Europe

Crop and growth stage: minimal crop cover  
 Number of applications: 1  
 Interval : -  
 Application rate(s): 20 g a.s./ha  
 Application window: March-May, North and South Europe

Main routes of entry

/

| FOCUS STEP 1 Scenario                                | Day after overall maximum | M310I017 PEC <sub>SW</sub> (µg/L) |     | M310I017 PEC <sub>SED</sub> (µg/kg) |     |
|------------------------------------------------------|---------------------------|-----------------------------------|-----|-------------------------------------|-----|
|                                                      |                           | Actual                            | TWA | Actual                              | TWA |
| Vegetables, leafy;<br>2 x 10 g a.s. ha <sup>-1</sup> | 0 h                       | 0.002                             |     | 4.348                               |     |
| Vegetables, leafy;<br>1 x 20 g a.s. ha <sup>-1</sup> | 0 h                       | 0.002                             |     | 4.348                               |     |

| FOCUS STEP 2<br>Scenario<br>North Europe                | Day after<br>overall<br>maximum | M310I017 PEC <sub>SW</sub> (µg/L) |     | M310I017 PEC <sub>SED</sub> (µg/kg) |     |
|---------------------------------------------------------|---------------------------------|-----------------------------------|-----|-------------------------------------|-----|
|                                                         |                                 | Actual                            | TWA | Actual                              | TWA |
| Vegetables,<br>leafy;<br>1 x 10 g a.s. ha <sup>-1</sup> | 0 h                             | <0.001                            |     | 0.258                               |     |
| Vegetables,<br>leafy;<br>2 x 10 g a.s. ha <sup>-1</sup> | 0 h                             | <0.001                            |     | 0.429                               |     |
| Vegetables,<br>leafy;<br>1 x 20 g a.s. ha <sup>-1</sup> | 0 h                             | <0.001                            |     | 0.516                               |     |

| FOCUS STEP 2<br>Scenario<br>South Europe                | Day after<br>overall<br>maximum | M310I017 PEC <sub>SW</sub> (µg/L) |     | M310I017 PEC <sub>SED</sub> (µg/kg) |     |
|---------------------------------------------------------|---------------------------------|-----------------------------------|-----|-------------------------------------|-----|
|                                                         |                                 | Actual                            | TWA | Actual                              | TWA |
| Vegetables,<br>leafy;<br>1 x 10 g a.s. ha <sup>-1</sup> | 0 h                             | <0.001                            |     | 0.516                               |     |
| Vegetables,<br>leafy;<br>2 x 10 g a.s. ha <sup>-1</sup> | 0 h                             | <0.001                            |     | 0.857                               |     |
| Vegetables,<br>leafy;<br>1 x 20 g a.s. ha <sup>-1</sup> | 0 h                             | <0.001                            |     | 1.031                               |     |

**Metabolite DCVA**Parameters used in FOCUS<sub>sw</sub> step 1 and 2

Molecular weight: 209.1  
 Soil or water metabolite: soil and water metabolite  
 Water solubility (mg/L): 129 mg/L at 20°C  
 Koc: 46.3 mL/g (geometric mean)  
 DT<sub>50</sub> soil: 4.8 days (geomean lab DT<sub>50</sub>'s) (Note: the correct value is 5.1 d).  
 DT<sub>50</sub> water/sediment system : 16.1 days (geomean)  
 DT<sub>50</sub> water : 16.1 days (DT<sub>50</sub> of whole system)  
 DT<sub>50</sub> sediment : 16.1 days (DT<sub>50</sub> of whole system)  
 Crop interception (%): minimal crop cover  
 Maximum occurrence observed (% molar basis with respect to the parent)  
 Total Water and Sediment: 66.6%  
 Soil: 13.6%

Parameters used in FOCUS<sub>sw</sub> step 3 (if performed)

/



## Application rate

|                                                                                                                                                                                                                                                                                                                                                                                                                                                                                                                                                                                                                                                                                                                                                                                                                                                                                                                                                                                                 |
|-------------------------------------------------------------------------------------------------------------------------------------------------------------------------------------------------------------------------------------------------------------------------------------------------------------------------------------------------------------------------------------------------------------------------------------------------------------------------------------------------------------------------------------------------------------------------------------------------------------------------------------------------------------------------------------------------------------------------------------------------------------------------------------------------------------------------------------------------------------------------------------------------------------------------------------------------------------------------------------------------|
| <p><u>Vegetables, leafy (FOCUS Step 1-2)</u></p> <p>Crop and growth stage: minimal crop cover</p> <p>Number of applications: 2</p> <p>Interval : 7 days</p> <p>Application rate(s): 10 g a.s./ha</p> <p>Application window: March-May, North and South Europe</p> <p>Crop and growth stage: minimal crop cover</p> <p>Number of applications: 1</p> <p>Interval : -</p> <p>Application rate(s): 20 g a.s./ha</p> <p>Application window: March-May, North and South Europe</p> <p><u>Vegetables, fruiting – Greenhouse (FOCUS Step 2) default drift value of 0.1%</u></p> <p>Crop and growth stage: no interception</p> <p>Number of applications: 2</p> <p>Interval : 7 days</p> <p>Application rate(s): 15 g a.s./ha</p> <p>Application window: March-May, North and South Europe</p> <p>Crop and growth stage: no interception</p> <p>Number of applications: 1</p> <p>Interval : -</p> <p>Application rate(s): 30 g a.s./ha</p> <p>Application window: March-May, North and South Europe</p> |
| /                                                                                                                                                                                                                                                                                                                                                                                                                                                                                                                                                                                                                                                                                                                                                                                                                                                                                                                                                                                               |

## Main routes of entry

| FOCUS STEP 1 Scenario                                | Day after overall maximum | DCVA PEC <sub>SW</sub> (µg/L) |     | DCVA PEC <sub>SED</sub> (µg/kg) |     |
|------------------------------------------------------|---------------------------|-------------------------------|-----|---------------------------------|-----|
|                                                      |                           | Actual                        | TWA | Actual                          | TWA |
| Vegetables, leafy;<br>2 x 10 g a.s. ha <sup>-1</sup> | 0 h                       | 2.591                         |     | 1.171                           |     |
| Vegetables, leafy;<br>1 x 20 g a.s. ha <sup>-1</sup> | 0 h                       | 2.591                         |     | 1.171                           |     |

| FOCUS STEP 2<br>Scenario<br>North Europe                | Day after<br>overall<br>maximum | DCVA PEC <sub>SW</sub> (µg/L) |     | DCVA PEC <sub>SED</sub> (µg/kg) |     |
|---------------------------------------------------------|---------------------------------|-------------------------------|-----|---------------------------------|-----|
|                                                         |                                 | Actual                        | TWA | Actual                          | TWA |
| Vegetables,<br>leafy;<br>1 x 10 g a.s. ha <sup>-1</sup> | 0 h                             | 0.188                         |     | 0.083                           |     |
| Vegetables,<br>leafy;<br>2 x 10 g a.s. ha <sup>-1</sup> | 0 h                             | 0.333                         |     | 0.148                           |     |
| Vegetables,<br>leafy;<br>1 x 20 g a.s. ha <sup>-1</sup> | 0 h                             | 0.376                         |     | 0.166                           |     |

| FOCUS STEP 2<br>Scenario<br>South Europe                | Day after<br>overall<br>maximum | DCVA PEC <sub>SW</sub> (µg/L) |     | DCVA PEC <sub>SED</sub> (µg/kg) |     |
|---------------------------------------------------------|---------------------------------|-------------------------------|-----|---------------------------------|-----|
|                                                         |                                 | Actual                        | TWA | Actual                          | TWA |
| Vegetables,<br>leafy;<br>1 x 10 g a.s. ha <sup>-1</sup> | 0 h                             | 0.351                         |     | 0.159                           |     |
| Vegetables,<br>leafy;<br>2 x 10 g a.s. ha <sup>-1</sup> | 0 h                             | 0.628                         |     | 0.285                           |     |
| Vegetables,<br>leafy;<br>1 x 20 g a.s. ha <sup>-1</sup> | 0 h                             | 0.702                         |     | 0.317                           |     |

| FOCUS STEP 2<br>Scenario<br>Greenhouse                     | Day after<br>overall<br>maximum | DCVA PEC <sub>SW</sub> (µg/L) |     | DCVA PEC <sub>SED</sub> (µg/kg) |     |
|------------------------------------------------------------|---------------------------------|-------------------------------|-----|---------------------------------|-----|
|                                                            |                                 | Actual                        | TWA | Actual                          | TWA |
| Vegetables,<br>fruiting;<br>2 x 15 g a.s. ha <sup>-1</sup> | 0 h                             | 0.003                         |     | 0.001                           |     |
| Vegetables,<br>fruiting;<br>1 x 30 g a.s. ha <sup>-1</sup> | 0 h                             | 0.003                         |     | 0.001                           |     |

Metabolite **3-PBA**

Parameters used in FOCUSsw step 1 and 2

Molecular weight: 214.2  
 Soil or water metabolite: soil and water metabolite  
 Water solubility (mg/L): 24.68 mg/L at 20°C  
 Koc: 78.5 mL/g (geometric mean) (Note: the correct value is 72.7 mL/g (geometric mean),)  
 DT<sub>50</sub> soil : 1.1 days (geomean lab DT50's) (Note: the correct value is 1.7 d).  
 DT<sub>50</sub> water/sediment system : 20.2 days (geomean)  
 DT<sub>50</sub> water : 20.2 days (DT<sub>50</sub> of whole system)  
 DT<sub>50</sub> sediment : 20.2 days (DT<sub>50</sub> of whole system)  
 Crop interception (%): minimal crop cover  
 Maximum occurrence observed (% molar basis with respect to the parent)  
 Total Water and Sediment: 23.1%  
 Soil: 28.6%

Parameters used in FOCUSsw step 3 (if performed)

/

Application rate

Vegetables, leafy (FOCUS Step 1-2)  
 Crop and growth stage: minimal crop cover  
 Number of applications: 2  
 Interval : 7 days  
 Application rate(s): 10 g a.s./ha  
 Application window: March-May, North and South Europe

Crop and growth stage: minimal crop cover  
 Number of applications: 1  
 Interval : -  
 Application rate(s): 20 g a.s./ha  
 Application window: March-May, North and South Europe

Vegetables, fruiting – Greenhouse (FOCUS Step 2) default drift value of 0.1%  
 Crop and growth stage: no interception  
 Number of applications: 2  
 Interval : 7 days  
 Application rate(s): 15 g a.s./ha  
 Application window: March-May, North and South Europe

Crop and growth stage: no interception  
 Number of applications: 1  
 Interval : -  
 Application rate(s): 30 g a.s./ha  
 Application window: March-May, North and South Europe

Main routes of entry

/

| FOCUS STEP 1<br>Scenario                                | Day after<br>overall<br>maximum | 3-PBA PEC <sub>SW</sub> (µg/L) |     | 3-PBA PEC <sub>SED</sub> (µg/kg) |     |
|---------------------------------------------------------|---------------------------------|--------------------------------|-----|----------------------------------|-----|
|                                                         |                                 | Actual                         | TWA | Actual                           | TWA |
| Vegetables,<br>leafy;<br>2 x 10 g a.s. ha <sup>-1</sup> | 0 h                             | 1.627                          |     | 1.260                            |     |
| Vegetables,<br>leafy;<br>1 x 20 g a.s. ha <sup>-1</sup> | 0 h                             | 1.627                          |     | 1.260                            |     |

| FOCUS STEP 2<br>Scenario<br>North Europe                | Day after<br>overall<br>maximum | 3-PBA PEC <sub>SW</sub> (µg/L) |     | 3-PBA PEC <sub>SED</sub> (µg/kg) |     |
|---------------------------------------------------------|---------------------------------|--------------------------------|-----|----------------------------------|-----|
|                                                         |                                 | Actual                         | TWA | Actual                           | TWA |
| Vegetables,<br>leafy;<br>1 x 10 g a.s. ha <sup>-1</sup> | 0 h                             | 0.064                          |     | 0.048                            |     |
| Vegetables,<br>leafy;<br>2 x 10 g a.s. ha <sup>-1</sup> | 0 h                             | 0.108                          |     | 0.084                            |     |
| Vegetables,<br>leafy;<br>1 x 20 g a.s. ha <sup>-1</sup> | 0 h                             | 0.128                          |     | 0.096                            |     |

| FOCUS STEP 2<br>Scenario<br>South Europe                | Day after<br>overall<br>maximum | 3-PBA PEC <sub>SW</sub> (µg/L) |     | 3-PBA PEC <sub>SED</sub> (µg/kg) |     |
|---------------------------------------------------------|---------------------------------|--------------------------------|-----|----------------------------------|-----|
|                                                         |                                 | Actual                         | TWA | Actual                           | TWA |
| Vegetables,<br>leafy;<br>1 x 10 g a.s. ha <sup>-1</sup> | 0 h                             | 0.119                          |     | 0.091                            |     |
| Vegetables,<br>leafy;<br>2 x 10 g a.s. ha <sup>-1</sup> | 0 h                             | 0.209                          |     | 0.161                            |     |
| Vegetables,<br>leafy;<br>1 x 20 g a.s. ha <sup>-1</sup> | 0 h                             | 0.237                          |     | 0.182                            |     |

| FOCUS STEP 2<br>Scenario<br>Greenhouse                     | Day after<br>overall<br>maximum | 3-PBA PEC <sub>SW</sub> (µg/L) |     | 3-PBA PEC <sub>SED</sub> (µg/kg) |     |
|------------------------------------------------------------|---------------------------------|--------------------------------|-----|----------------------------------|-----|
|                                                            |                                 | Actual                         | TWA | Actual                           | TWA |
| Vegetables,<br>fruiting;<br>2 x 15 g a.s. ha <sup>-1</sup> | 0 h                             | 0.001                          |     | <0.001                           |     |
| Vegetables,<br>fruiting;<br>1 x 30 g a.s. ha <sup>-1</sup> | 0 h                             | 0.001                          |     | <0.001                           |     |

Metabolite **3-PBAldehyde**

Parameters used in FOCUSsw step 1 and 2

Molecular weight: 198.2  
 Soil or water metabolite: water metabolite  
 Water solubility (mg/L): 51.49 mg/L at 20°C  
 Koc: 1 mL/g (worst-case assumption)  
 DT<sub>50</sub> soil : -  
 DT<sub>50</sub> water/sediment system : 1000 days (conservative assumption)  
 DT<sub>50</sub> water : 1000 days (conservative assumption)  
 DT<sub>50</sub> sediment : 1000 days (conservative assumption)  
 Crop interception (%): minimal crop cover  
 Maximum occurrence observed (% molar basis with respect to the parent)  
 Total Water and Sediment: 15.9%  
 Soil: -%

Parameters used in FOCUSsw step 3 (if performed)

/

Application rate

Vegetables, leafy (FOCUS Step 1-2)

Crop and growth stage: minimal crop cover  
 Number of applications: 2  
 Interval : 7 days  
 Application rate(s): 10 g a.s./ha  
 Application window: March-May, North and South Europe

Crop and growth stage: minimal crop cover  
 Number of applications: 1  
 Interval : -  
 Application rate(s): 20 g a.s./ha  
 Application window: March-May, North and South Europe

Vegetables, fruiting – Greenhouse (FOCUS Step 2) default drift value of 0.1%

Crop and growth stage: no interception  
 Number of applications: 2  
 Interval : 7 days  
 Application rate(s): 15 g a.s./ha  
 Application window: March-May, North and South Europe

Crop and growth stage: no interception  
 Number of applications: 1  
 Interval : -  
 Application rate(s): 30 g a.s./ha  
 Application window: March-May, North and South Europe

Main routes of entry

/

| FOCUS STEP 1<br>Scenario                                | Day after<br>overall<br>maximum | 3-PBAdehyde PEC <sub>SW</sub> (µg/L) |     | 3-PBAdehyde PEC <sub>SED</sub> (µg/kg) |     |
|---------------------------------------------------------|---------------------------------|--------------------------------------|-----|----------------------------------------|-----|
|                                                         |                                 | Actual                               | TWA | Actual                                 | TWA |
| Vegetables,<br>leafy;<br>2 x 10 g a.s. ha <sup>-1</sup> | 0 h                             | 0.518                                |     | -                                      |     |
| Vegetables,<br>leafy;<br>1 x 20 g a.s. ha <sup>-1</sup> | 0 h                             | 0.518                                |     | -                                      |     |

| FOCUS STEP 2<br>Scenario<br>North Europe                | Day after<br>overall<br>maximum | 3-PBAdehyde PEC <sub>SW</sub> (µg/L) |     | 3-PBAdehyde PEC <sub>SED</sub> (µg/kg) |     |
|---------------------------------------------------------|---------------------------------|--------------------------------------|-----|----------------------------------------|-----|
|                                                         |                                 | Actual                               | TWA | Actual                                 | TWA |
| Vegetables,<br>leafy;<br>1 x 10 g a.s. ha <sup>-1</sup> | 0 h                             | 0.042                                |     | -                                      |     |
| Vegetables,<br>leafy;<br>2 x 10 g a.s. ha <sup>-1</sup> | 0 h                             | 0.077                                |     | -                                      |     |
| Vegetables,<br>leafy;<br>1 x 20 g a.s. ha <sup>-1</sup> | 0 h                             | 0.083                                |     | -                                      |     |

| FOCUS STEP 2<br>Scenario<br>South Europe                | Day after<br>overall<br>maximum | 3-PBAdehyde PEC <sub>SW</sub> (µg/L) |     | 3-PBAdehyde PEC <sub>SED</sub> (µg/kg) |     |
|---------------------------------------------------------|---------------------------------|--------------------------------------|-----|----------------------------------------|-----|
|                                                         |                                 | Actual                               | TWA | Actual                                 | TWA |
| Vegetables,<br>leafy;<br>1 x 10 g a.s. ha <sup>-1</sup> | 0 h                             | 0.044                                |     | -                                      |     |
| Vegetables,<br>leafy;<br>2 x 10 g a.s. ha <sup>-1</sup> | 0 h                             | 0.142                                |     | -                                      |     |
| Vegetables,<br>leafy;<br>1 x 20 g a.s. ha <sup>-1</sup> | 0 h                             | 0.153                                |     | -                                      |     |

| FOCUS STEP 2<br>Scenario<br>Greenhouse                     | Day after<br>overall<br>maximum | 3-PBAdehyde PEC <sub>SW</sub> (µg/L) |     | 3-PBAdehyde PEC <sub>SED</sub> (µg/kg) |     |
|------------------------------------------------------------|---------------------------------|--------------------------------------|-----|----------------------------------------|-----|
|                                                            |                                 | Actual                               | TWA | Actual                                 | TWA |
| Vegetables,<br>fruiting;<br>2 x 15 g a.s. ha <sup>-1</sup> | 0 h                             | <0.001                               |     | -                                      |     |
| Vegetables,<br>fruiting;<br>1 x 30 g a.s. ha <sup>-1</sup> | 0 h                             | <0.001                               |     | -                                      |     |

**Estimation of concentrations from other routes of exposure (Regulation (EU) N° 284/2013, Annex Part A, point 9.4)**

Method of calculation

Not applicable

**PEC**

Maximum concentration

Not relevant

## Ecotoxicology

### Effects on birds and other terrestrial vertebrates (Regulation (EU) N° 283/2013, Annex Part A, point 8.1 and Regulation (EU) N° 284/2013, Annex Part A, point 10.1)

| Species                                                                                                                                                                                                                                                                                                                                                                                                                                                                                                                                                                                                                                                                                                                                                | Test substance                | Time scale | End point        | Toxicity<br>(mg/kg bw per day)                  |
|--------------------------------------------------------------------------------------------------------------------------------------------------------------------------------------------------------------------------------------------------------------------------------------------------------------------------------------------------------------------------------------------------------------------------------------------------------------------------------------------------------------------------------------------------------------------------------------------------------------------------------------------------------------------------------------------------------------------------------------------------------|-------------------------------|------------|------------------|-------------------------------------------------|
| <b>Birds</b>                                                                                                                                                                                                                                                                                                                                                                                                                                                                                                                                                                                                                                                                                                                                           |                               |            |                  |                                                 |
| Bobwhite quail<br><i>Colinus virginianus</i>                                                                                                                                                                                                                                                                                                                                                                                                                                                                                                                                                                                                                                                                                                           | a.s.                          | Acute      | LD <sub>50</sub> | > 2025 mg a.s./kg bw <sup>a</sup>               |
| Zebra finch<br><i>Taeniopygia guttata</i>                                                                                                                                                                                                                                                                                                                                                                                                                                                                                                                                                                                                                                                                                                              | a.s.                          | Acute      | LD <sub>50</sub> | 1360 mg a.s./kg bw <sup>a</sup>                 |
| Bobwhite quail<br><i>Colinus virginianus</i>                                                                                                                                                                                                                                                                                                                                                                                                                                                                                                                                                                                                                                                                                                           | Preparation<br>(BAS 310 51 I) | Acute      | LD <sub>50</sub> | > 2000 mg prep./kg bw<br>(> 100 mg a.s./kg bw)  |
| Bobwhite quail<br><i>Colinus virginianus</i>                                                                                                                                                                                                                                                                                                                                                                                                                                                                                                                                                                                                                                                                                                           | a.s.                          | Long-term  | NOEL             | 16 mg a.s./kg bw/day                            |
| <b>Mammals</b>                                                                                                                                                                                                                                                                                                                                                                                                                                                                                                                                                                                                                                                                                                                                         |                               |            |                  |                                                 |
| Rat                                                                                                                                                                                                                                                                                                                                                                                                                                                                                                                                                                                                                                                                                                                                                    | a.s.                          | Acute      | LD <sub>50</sub> | 57 mg a.s./kg bw                                |
| Rat                                                                                                                                                                                                                                                                                                                                                                                                                                                                                                                                                                                                                                                                                                                                                    | a.s.                          | Acute      | LD <sub>50</sub> | 310 mg a.s./kg bw                               |
| Rat                                                                                                                                                                                                                                                                                                                                                                                                                                                                                                                                                                                                                                                                                                                                                    | a.s.                          | Acute      | LD <sub>50</sub> | 40-80 mg a.s./kg bw                             |
| Mouse                                                                                                                                                                                                                                                                                                                                                                                                                                                                                                                                                                                                                                                                                                                                                  | a.s.                          | Acute      | LD <sub>50</sub> | 35 mg a.s./kg bw                                |
| Mouse                                                                                                                                                                                                                                                                                                                                                                                                                                                                                                                                                                                                                                                                                                                                                  | a.s.                          | Acute      | LD <sub>50</sub> | 50 mg a.s./kg bw                                |
| Rat                                                                                                                                                                                                                                                                                                                                                                                                                                                                                                                                                                                                                                                                                                                                                    | Preparation<br>(BAS 310 55 I) | Acute      | LD <sub>50</sub> | > 300 mg prep./kg bw<br>(> 15.15 mg a.s./kg bw) |
| Rat                                                                                                                                                                                                                                                                                                                                                                                                                                                                                                                                                                                                                                                                                                                                                    | a.s.                          | Long-term  | NOAEL            | 9 mg a.s./kg bw/day                             |
| <p>Endocrine disrupting properties (Annex Part A, points 8.1.5)</p> <p>Based on reproductive studies with birds and mammals, there are no indications that alpha-cypermethrin has endocrine disruptive potential. However, as there are currently no defined criteria for identifying endocrine disruptors, it is difficult to draw a firm conclusion</p> <p>At Pesticides Peer Review Meeting 175 on mammalian toxicology, a data gap for a male pubertal assay was set. At Pesticides Peer Review Meeting 177 on ecotoxicology, the majority of the experts agreed that, pending on the outcome of the data gap in the mammalian toxicology section, further consideration may be needed on potential endocrine effects in non-target organisms.</p> |                               |            |                  |                                                 |



Additional higher tier studies (Annex Part A, points 10.1.1.2):

No additional higher tier studies have been provided.

Terrestrial vertebrate wildlife (birds, mammals, reptile and amphibians) (Annex Part A, points 8.1.4, 10.1.3):

A study with the African clawed frog (*Xenopus laevis*) has been submitted, in which only the aquatic stages were tested. From this study, an LC<sub>50</sub> for embryos of 30.6 µg a.s./L and an LC<sub>50</sub> for larvae of 6.9 µg a.s./L were derived.

*Alpha-cypermethrin was administered either in a gelatine capsule without first being dissolved in a carrier, or by dissolving the test item in 0.5 aqueous carboxy methyl cellulose as a carrier. From the acute toxicity studies performed with mammals, it is however clear that the carrier used affects the toxicity of alpha-cypermethrin, with a higher toxicity in oil-based carriers compared to aqueous carriers. This endpoint is thus derived from a study that may not have been worst case in terms of the method of administration or the carrier used*

### Toxicity/exposure ratios for terrestrial vertebrates (Regulation (EU) N° 284/2013, Part A, Annex point 10.1)

#### Cereals at BBCH 51-83, 2 x 10 g a.s./ha

| Growth stage                                                                                                                                                                                                                                                       | Indicator or focal species        | Time scale        | DDD<br>(mg/kg bw per day)   | TER               | Trigger        |
|--------------------------------------------------------------------------------------------------------------------------------------------------------------------------------------------------------------------------------------------------------------------|-----------------------------------|-------------------|-----------------------------|-------------------|----------------|
| <b>Screening Step (Birds)</b>                                                                                                                                                                                                                                      |                                   |                   |                             |                   |                |
| All                                                                                                                                                                                                                                                                | Small omnivorous bird             | Acute             | 2.22                        | 747 <sup>1</sup>  | 10             |
| All                                                                                                                                                                                                                                                                | Small omnivorous bird             | Long-term         | 0.55                        | 29.1              | 5              |
| <b>Screening Step (Mammals)</b>                                                                                                                                                                                                                                    |                                   |                   |                             |                   |                |
| All                                                                                                                                                                                                                                                                | Small herbivorous mammal          | Acute             | 1.66                        | 36.8 <sup>2</sup> | 10             |
| All                                                                                                                                                                                                                                                                | Small herbivorous mammal          | Long-term         | 0.41                        | 21.97             | 5              |
| <sup>1</sup> a geomean LD <sub>50</sub> of 1660 mg a.s./kg bw, calculated from the LD <sub>50</sub> for Bobwhite quail ( <i>Colinus virginianus</i> ) and Zebra finch ( <i>Taeniopygia guttata</i> ), was used in the risk assessment to calculate this TER value. |                                   |                   |                             |                   |                |
| <sup>2</sup> a geomean LD <sub>50</sub> value of 61 mg a.s./kg bw, calculated based on the available and relevant acute toxicity studies on mice (2) and rats (3), was used in the risk assessment to calculate this TER value.                                    |                                   |                   |                             |                   |                |
| <b>Risk from bioaccumulation and food chain behaviour</b> [indicate when not relevant i.e if Log kow≤3]                                                                                                                                                            |                                   |                   |                             |                   |                |
| Indicator or focal species                                                                                                                                                                                                                                         |                                   | Time scale        | DDD<br>(mg/kg bw per day)   | TER               | Trigger        |
| Earthworm-eating birds                                                                                                                                                                                                                                             |                                   | Long-term         | 0.028                       | 581               | 5              |
| Earthworm-eating mammals                                                                                                                                                                                                                                           |                                   | Long-term         | 0.0029                      | 4492              | 5              |
| Fish-eating birds                                                                                                                                                                                                                                                  |                                   | Long-term         | 0.029                       | 549               | 5              |
| Fish-eating mammals                                                                                                                                                                                                                                                |                                   | Long-term         | 0.026                       | 345               | 5              |
| <b>Risk from consumption of contaminated water</b>                                                                                                                                                                                                                 |                                   |                   |                             |                   |                |
| <b>Scenarios</b>                                                                                                                                                                                                                                                   | <b>Indicator or focal species</b> | <b>Time scale</b> | <b>PEC<sub>dw</sub>xDWR</b> | <b>TER</b>        | <b>Trigger</b> |
| Leaf scenario                                                                                                                                                                                                                                                      | Birds                             | acute             | Not relevant                |                   | 5              |
| <b>Puddle scenario, Screening step</b>                                                                                                                                                                                                                             |                                   |                   |                             |                   |                |
| 1) Application rate (g a.s./ha)/relevant endpoint <50 (koc<500 L/kg), TER calculation not needed                                                                                                                                                                   |                                   |                   |                             |                   |                |
| 2) Application rate (g a.s./ha)/relevant endpoint <3000 (koc≥500 L/kg), TER calculation not needed                                                                                                                                                                 |                                   |                   |                             |                   |                |
| Puddle scenario                                                                                                                                                                                                                                                    | Birds                             | acute             | Not needed                  | Case 2 (< 0.011)  | 10             |
| Puddle scenario                                                                                                                                                                                                                                                    | Mammals                           | acute             | Not needed                  | Case 2 (< 0.306)  | 10             |
| Puddle scenario                                                                                                                                                                                                                                                    | Birds                             | Long-term         | Not needed                  | Case 2 (< 1.17)   | 5              |
| Puddle scenario                                                                                                                                                                                                                                                    | Mammals                           | Long-term         | Not needed                  | Case 2 (< 2.07)   | 5              |

**Oilseed rape at BBCH 51-59, 2 x 10 g a.s./ha**

| Growth stage                                                                                                                                                                                                                                                       | Indicator or focal species        | Time scale        | DDD<br>(mg/kg bw per day)    | TER               | Trigger        |
|--------------------------------------------------------------------------------------------------------------------------------------------------------------------------------------------------------------------------------------------------------------------|-----------------------------------|-------------------|------------------------------|-------------------|----------------|
| <b>Screening Step (Birds)</b>                                                                                                                                                                                                                                      |                                   |                   |                              |                   |                |
| All                                                                                                                                                                                                                                                                | Small omnivorous bird             | Acute             | 2.22                         | 747 <sup>1</sup>  | 10             |
| All                                                                                                                                                                                                                                                                | Small omnivorous bird             | Long-term         | 0.55                         | 29.1              | 5              |
| <b>Screening Step (Mammals)</b>                                                                                                                                                                                                                                    |                                   |                   |                              |                   |                |
| All                                                                                                                                                                                                                                                                | Small herbivorous mammal          | Acute             | 1.66                         | 36.8 <sup>2</sup> | 10             |
| All                                                                                                                                                                                                                                                                | Small herbivorous mammal          | Long-term         | 0.41                         | 21.97             | 5              |
| <sup>1</sup> a geomean LD <sub>50</sub> of 1660 mg a.s./kg bw, calculated from the LD <sub>50</sub> for Bobwhite quail ( <i>Colinus virginianus</i> ) and Zebra finch ( <i>Taeniopygia guttata</i> ), was used in the risk assessment to calculate this TER value. |                                   |                   |                              |                   |                |
| <sup>2</sup> a geomean LD <sub>50</sub> value of 61 mg a.s./kg bw, calculated based on the available and relevant acute toxicity studies on mice (2) and rats (3), was used in the risk assessment to calculate this TER value.                                    |                                   |                   |                              |                   |                |
| <b>Risk from bioaccumulation and food chain behaviour</b> [indicate when not relevant i.e if Log K <sub>ow</sub> ≤ 3]                                                                                                                                              |                                   |                   |                              |                   |                |
| Indicator or focal species                                                                                                                                                                                                                                         |                                   | Time scale        | DDD<br>(mg/kg bw per day)    | TER               | Trigger        |
| Earthworm-eating birds                                                                                                                                                                                                                                             |                                   | Long-term         | 0.028                        | 581               | 5              |
| Earthworm-eating mammals                                                                                                                                                                                                                                           |                                   | Long-term         | 0.0029                       | 4492              | 5              |
| Fish-eating birds                                                                                                                                                                                                                                                  |                                   | Long-term         | 0.029                        | 549               | 5              |
| Fish-eating mammals                                                                                                                                                                                                                                                |                                   | Long-term         | 0.026                        | 345               | 5              |
| <b>Risk from consumption of contaminated water</b>                                                                                                                                                                                                                 |                                   |                   |                              |                   |                |
| <b>Scenarios</b>                                                                                                                                                                                                                                                   | <b>Indicator or focal species</b> | <b>Time scale</b> | <b>PEC<sub>d,w</sub>xDWR</b> | <b>TER</b>        | <b>Trigger</b> |
| Leaf scenario                                                                                                                                                                                                                                                      | Birds                             | acute             | Not relevant                 |                   | 5              |
| <b>Puddle scenario, Screening step</b>                                                                                                                                                                                                                             |                                   |                   |                              |                   |                |
| 1) Application rate (g a.s./ha)/relevant endpoint <50 (K <sub>oc</sub> <500 L/kg), TER calculation not needed                                                                                                                                                      |                                   |                   |                              |                   |                |
| 2) Application rate (g a.s./ha)/relevant endpoint <3000 (K <sub>oc</sub> ≥500 L/kg), TER calculation not needed                                                                                                                                                    |                                   |                   |                              |                   |                |
| Puddle scenario                                                                                                                                                                                                                                                    | Birds                             | acute             | Not needed                   | Case 2 (< 0.011)  | 10             |
| Puddle scenario                                                                                                                                                                                                                                                    | Mammals                           | acute             | Not needed                   | Case 2 (< 0.306)  | 10             |
| Puddle scenario                                                                                                                                                                                                                                                    | Birds                             | Long-term         | Not needed                   | Case 2 (< 1.17)   | 5              |
| Puddle scenario                                                                                                                                                                                                                                                    | Mammals                           | Long-term         | Not needed                   | Case 2 (< 2.07)   | 5              |

**Leafy vegetables (lettuce and leafy cabbage) at BBCH 10-49, 2 x 10 g a.s./ha or 1 x 20 g a.s./ha**

| Growth stage                                                                                                                                                                                                                                                       | Indicator or focal species | Time scale | DDD<br>(mg/kg bw per day) | TER               | Trigger |
|--------------------------------------------------------------------------------------------------------------------------------------------------------------------------------------------------------------------------------------------------------------------|----------------------------|------------|---------------------------|-------------------|---------|
| <b>Screening Step (Birds)</b>                                                                                                                                                                                                                                      |                            |            |                           |                   |         |
| All                                                                                                                                                                                                                                                                | Small omnivorous bird      | Acute      | 3.18                      | 523 <sup>1</sup>  | 10      |
| All                                                                                                                                                                                                                                                                | Small omnivorous bird      | Long-term  | 0.69                      | 23.3              | 5       |
| <b>Screening Step (Mammals)</b>                                                                                                                                                                                                                                    |                            |            |                           |                   |         |
| All                                                                                                                                                                                                                                                                | Small herbivorous mammal   | Acute      | 2.73                      | 22.4 <sup>2</sup> | 10      |
| All                                                                                                                                                                                                                                                                | Small herbivorous mammal   | Long-term  | 0.77                      | 11.74             | 5       |
| <sup>1</sup> a geomean LD <sub>50</sub> of 1660 mg a.s./kg bw, calculated from the LD <sub>50</sub> for Bobwhite quail ( <i>Colinus virginianus</i> ) and Zebra finch ( <i>Taeniopygia guttata</i> ), was used in the risk assessment to calculate this TER value. |                            |            |                           |                   |         |
| <sup>2</sup> a geomean LD <sub>50</sub> value of 61 mg a.s./kg bw, calculated based on the available and relevant acute toxicity studies on mice (2) and rats (3), was used in the risk assessment to calculate this TER value.                                    |                            |            |                           |                   |         |
| <b>Risk from bioaccumulation and food chain behaviour</b> [indicate when not relevant i.e if Log K <sub>ow</sub> ≤ 3]                                                                                                                                              |                            |            |                           |                   |         |

| Indicator or focal species                                                                         | Time scale                 | DDD<br>(mg/kg bw per day) | TER                     | Trigger          |         |
|----------------------------------------------------------------------------------------------------|----------------------------|---------------------------|-------------------------|------------------|---------|
| Earthworm-eating birds                                                                             | Long-term                  | 0.028                     | 581                     | 5                |         |
| Earthworm-eating mammals                                                                           | Long-term                  | 0.0029                    | 4492                    | 5                |         |
| Fish-eating birds                                                                                  | Long-term                  | 0.018                     | 878                     | 5                |         |
| Fish-eating mammals                                                                                | Long-term                  | 0.017                     | 553                     | 5                |         |
| <b>Risk from consumption of contaminated water</b>                                                 |                            |                           |                         |                  |         |
| Scenarios                                                                                          | Indicator or focal species | Time scale                | PEC <sub>dw</sub> × DWR | TER              | Trigger |
| Leaf scenario                                                                                      | Birds                      | acute                     | 9.2                     | 180              | 5       |
| <b>Puddle scenario, Screening step</b>                                                             |                            |                           |                         |                  |         |
| 1) Application rate (g a.s./ha)/relevant endpoint <50 (koc<500 L/kg), TER calculation not needed   |                            |                           |                         |                  |         |
| 2) Application rate (g a.s./ha)/relevant endpoint <3000 (koc≥500 L/kg), TER calculation not needed |                            |                           |                         |                  |         |
| Puddle scenario                                                                                    | Birds                      | acute                     | Not needed              | Case 2 (< 0.012) | 10      |
| Puddle scenario                                                                                    | Mammals                    | acute                     | Not needed              | Case 2 (< 0.327) | 10      |
| Puddle scenario                                                                                    | Birds                      | Long-term                 | Not needed              | Case 2 (< 1.25)  | 5       |
| Puddle scenario                                                                                    | Mammals                    | Long-term                 | Not needed              | Case 2 (< 2.22)  | 5       |

**Cucumber/courgette at BBCH 10-89, 2 x 15 g a.s./ha or 1 x 30 g a.s./ha (glasshouse use only, restricted to permanent structures)**

No risk assessment required, as no exposure to birds and mammals is expected from the use in permanent greenhouses.

**Toxicity data for all aquatic tested species (Regulation (EU) N° 283/2013, Annex Part A, points 8.2 and Regulation (EU) N° 284/2013 Annex Part A, point 10.2)\***

| Group                                              | Test substance     | Time-scale<br>(Test type)         | End point                   | Toxicity <sup>1</sup>                    |
|----------------------------------------------------|--------------------|-----------------------------------|-----------------------------|------------------------------------------|
| Laboratory tests                                   |                    |                                   |                             |                                          |
| Fish                                               |                    |                                   |                             |                                          |
| Rainbow trout<br>( <i>Oncorhynchus mykiss</i> )    | BAS 310 51 I       | Acute 96 hr<br>(static)           | Mortality, LC <sub>50</sub> | 46 µg prep./L<br>(2.3 µg a.s./L)<br>(mm) |
| Fathead minnow<br>( <i>Pimephales promelas</i> )   | Alpha-cypermethrin | Acute 96 hr<br>(flow-through)     | Mortality, LC <sub>50</sub> | 0.93 µg a.s./L<br>(mm)                   |
| Fathead minnow<br>( <i>Pimephales promelas</i> )   | Alpha-cypermethrin | Chronic, 34 day<br>(flow-through) | Larval survival, NOEC       | 0.03 µg a.s./L<br>(mm) <sup>2</sup>      |
| Bluegill sunfish<br>( <i>Lepomis macrochirus</i> ) | cis-DCVA           | Acute 96 hr<br>(static)           | Mortality, LC <sub>50</sub> | > 102800 µg/L<br>(mm)                    |

| Group                                              | Test substance     | Time-scale<br>(Test type)                        | End point                                                                        | Toxicity <sup>1</sup>                                                                                                                                                                                     |
|----------------------------------------------------|--------------------|--------------------------------------------------|----------------------------------------------------------------------------------|-----------------------------------------------------------------------------------------------------------------------------------------------------------------------------------------------------------|
| Bluegill sunfish<br>( <i>Lepomis macrochirus</i> ) | 3-PBA              | Acute 96 hr<br>(static)                          | Mortality, LC <sub>50</sub>                                                      | > 103200 µg/L<br>(mm)                                                                                                                                                                                     |
| Amphibians                                         |                    |                                                  |                                                                                  |                                                                                                                                                                                                           |
| African clawed frog<br>( <i>Xenopus laevis</i> )   | Alpha-cypermethrin | Acute, 96 hr<br>(semi-static)                    | Mortality, LC <sub>50</sub><br>(embryos)<br>Mortality, LC <sub>50</sub> (larvae) | 30.6 µg a.s./L<br>(mm)<br>6.9 µg a.s./L (mm)                                                                                                                                                              |
| Aquatic invertebrates                              |                    |                                                  |                                                                                  |                                                                                                                                                                                                           |
| Water flea<br>( <i>Daphnia magna</i> )             | BAS 310 51 I       | Acute, 48 h<br>(static)                          | Mortality, EC <sub>50</sub>                                                      | 2.19 µg prep/L<br>(0.109 µg a.s./L)<br>(mm)                                                                                                                                                               |
| Phantom midge<br>( <i>Chaoborus crystallinus</i> ) | Alpha-cypermethrin | Acute, 48 h<br>(static)                          | Mortality, EC <sub>50</sub>                                                      | 0.04454 µg<br>a.s./L (mm)                                                                                                                                                                                 |
| Water flea<br>( <i>Daphnia magna</i> )             | Alpha-cypermethrin | Chronic, 21<br>d (semi-static)                   | Development and<br>reproduction, NOEC                                            | 0.0177 µg a.s./L<br>(mm)                                                                                                                                                                                  |
| Water flea<br>( <i>Daphnia magna</i> )             | cis-DCVA           | Acute, 48 h<br>(static)                          | Mortality, EC <sub>50</sub>                                                      | 61900 µg/L (nom)                                                                                                                                                                                          |
| Water flea<br>( <i>Daphnia magna</i> )             | 3-PBA              | Acute, 48 h<br>(static)                          | Mortality, EC <sub>50</sub>                                                      | 39000 µg/L (nom)                                                                                                                                                                                          |
| Sediment-dwelling organisms                        |                    |                                                  |                                                                                  |                                                                                                                                                                                                           |
| Midge ( <i>Chironomus riparius</i> )               | Alpha-cypermethrin | Acute 48 h<br>(static)                           | Mortality, EC <sub>50</sub>                                                      | 0.0126 µg a.s./L<br>(mm)                                                                                                                                                                                  |
| Midge ( <i>Chironomus riparius</i> )               | Alpha-cypermethrin | Chronic, 28<br>d, spiked<br>water (static)       | NOEC<br>EC <sub>50</sub><br>EC <sub>20</sub><br>EC <sub>10</sub>                 | 0.024 µg a.s./L<br>(nom)<br>0.227 µg a.s./L<br>(nom)<br>0.057 µg a.s./L<br>(nom)<br>0.028 µg a.s./L<br>(nom)                                                                                              |
| Midge ( <i>Chironomus riparius</i> )               | Alpha-cypermethrin | Chronic, 28<br>d, spiked<br>sediment<br>(static) | NOEC<br>EC <sub>50</sub><br>EC <sub>20</sub><br>EC <sub>10</sub>                 | 45.0 µg a.s./kg<br>dry sediment <sub>(mm)</sub><br>101.4 µg a.s./kg<br>dry sediment <sub>(mm)</sub><br>58.5 µg a.s./kg<br>dry sediment <sub>(mm)</sub><br>51.4 µg a.s./kg<br>dry sediment <sub>(mm)</sub> |

| Group                                                        | Test substance     | Time-scale<br>(Test type)               | End point                                                                                                                      | Toxicity <sup>1</sup>                                                                                                                                                                       |
|--------------------------------------------------------------|--------------------|-----------------------------------------|--------------------------------------------------------------------------------------------------------------------------------|---------------------------------------------------------------------------------------------------------------------------------------------------------------------------------------------|
| Blackworm ( <i>Lumbriculus variegatus</i> )                  | Alpha-cypermethrin | Chronic, 28 d, spiked sediment (static) | NOEC<br>EC <sub>50</sub><br>EC <sub>20</sub><br>EC <sub>10</sub>                                                               | 71.3 µg a.s./kg dry sediment <sub>(im)</sub><br>155 µg a.s./kg dry sediment <sub>(im)</sub><br>75.7 µg a.s./kg dry sediment <sub>(im)</sub><br>52.0 µg a.s./kg dry sediment <sub>(im)</sub> |
| Nematode ( <i>Caenorhabditis elegans</i> )                   | Alpha-cypermethrin | Chronic, 96 h, spiked sediment (static) | NOEC                                                                                                                           | 28600 µg a.s./kg dry sediment <sub>(mm)</sub>                                                                                                                                               |
| Algae                                                        |                    |                                         |                                                                                                                                |                                                                                                                                                                                             |
| Green microalgae ( <i>Pseudo-kirchneriella subcapitata</i> ) | Alpha-cypermethrin | Chronic, 96 h (static)                  | Growth rate:<br>E <sub>r</sub> C <sub>50</sub><br>NOEC <sub>r</sub>                                                            | ≥ 83.6 µg a.s./L <sub>(mm)</sub><br>83.6 µg a.s./L <sub>(mm)</sub>                                                                                                                          |
| Green microalgae ( <i>Pseudo-kirchneriella subcapitata</i> ) | Alpha-cypermethrin | Chronic, 72 h (static)                  | Growth rate:<br>E <sub>r</sub> C <sub>50</sub><br>Biomass:<br>E <sub>b</sub> C <sub>50</sub><br>E <sub>b</sub> C <sub>10</sub> | ≥ 898.5 µg a.s./L <sub>(mm)</sub><br>≥ 898.5 µg a.s./L <sub>(mm)</sub><br>< 28.4 µg a.s./L <sub>(mm)</sub>                                                                                  |

| Group                                                           | Test substance     | Time-scale<br>(Test type) | End point                                                                                                                                                                                                                                              | Toxicity <sup>1</sup>                                                                                                                                                                                                                                                              |
|-----------------------------------------------------------------|--------------------|---------------------------|--------------------------------------------------------------------------------------------------------------------------------------------------------------------------------------------------------------------------------------------------------|------------------------------------------------------------------------------------------------------------------------------------------------------------------------------------------------------------------------------------------------------------------------------------|
| Green microalgae<br>( <i>Pseudo-kirchneriella subcapitata</i> ) | BAS 310 51 I       | Chronic, 72 h (static)    | Growth rate:<br>E <sub>r</sub> C <sub>50</sub><br><br>E <sub>r</sub> C <sub>20</sub><br><br>E <sub>r</sub> C <sub>10</sub><br><br>Yield:<br>E <sub>y</sub> C <sub>50</sub><br><br>E <sub>y</sub> C <sub>20</sub><br><br>E <sub>y</sub> C <sub>10</sub> | 27560 µg prep./L<br>(1378 µg a.s./L)<br>(mm)<br>12300 µg prep./L<br>(614 µg a.s./L)<br>(mm)<br>7670 µg prep./L<br>(383 µg a.s./L)<br>(mm)<br>8480 µg prep./L<br>(423 µg a.s./L)<br>(mm)<br>3080 µg prep./L<br>(154 µg a.s./L)<br>(mm)<br>1700 µg prep./L<br>(85 µg a.s./L)<br>(mm) |
| Fresh water diatom<br>( <i>Navicula pelliculosa</i> )           | Alpha-cypermethrin | Chronic, 96 h (static)    | Growth rate:<br>E <sub>r</sub> C <sub>50</sub><br><br>NOEC <sub>r</sub><br><br>Yield:<br>E <sub>y</sub> C <sub>50</sub><br><br>NOEC <sub>y</sub>                                                                                                       | ≥ 70.3 µg a.s./L<br>(mm)<br>≥ 70.3 µg a.s./L<br>(mm)<br>≥ 70.3 µg a.s./L<br>(mm)<br>≥ 70.3 µg a.s./L<br>(mm)                                                                                                                                                                       |
| Blue-green algae<br>( <i>Anabaena flos-aquae</i> )              | Alpha-cypermethrin | Chronic, 96 h (static)    | Growth rate:<br>E <sub>r</sub> C <sub>50</sub><br><br>NOEC <sub>r</sub><br><br>Yield:<br>E <sub>y</sub> C <sub>50</sub><br><br>NOEC <sub>y</sub>                                                                                                       | ≥ 27.0 µg a.s./L<br>(mm)<br>≥ 27.0 µg a.s./L<br>(mm)<br>≥ 27.0 µg a.s./L<br>(mm)<br>≥ 27.0 µg a.s./L<br>(mm)                                                                                                                                                                       |

| Group                                                                                                                                                                                                                                                                                                                                                                                                                                                                                                                         | Test substance     | Time-scale<br>(Test type) | End point                                                                                                                                                                                                                                | Toxicity <sup>1</sup>                                                                                                    |
|-------------------------------------------------------------------------------------------------------------------------------------------------------------------------------------------------------------------------------------------------------------------------------------------------------------------------------------------------------------------------------------------------------------------------------------------------------------------------------------------------------------------------------|--------------------|---------------------------|------------------------------------------------------------------------------------------------------------------------------------------------------------------------------------------------------------------------------------------|--------------------------------------------------------------------------------------------------------------------------|
| Marine diatom<br>( <i>Skeletonema costatum</i> )                                                                                                                                                                                                                                                                                                                                                                                                                                                                              | Alpha-cypermethrin | Chronic, 96 h (static)    | Growth rate:<br>E <sub>r</sub> C <sub>50</sub><br><br>NOEC <sub>r</sub><br><br>Yield:<br>E <sub>y</sub> C <sub>50</sub><br><br>NOEC <sub>y</sub>                                                                                         | ≥ 33.4 µg a.s./L<br>(mm)<br>≥ 33.4 µg a.s./L<br>(mm)<br>≥ 33.4 µg a.s./L<br>(mm)<br>≥ 33.4 µg a.s./L<br>(mm)             |
| Green microalgae<br>( <i>Pseudo-kirchneriella subcapitata</i> )                                                                                                                                                                                                                                                                                                                                                                                                                                                               | cis-DCVA           | Chronic, 72 h (static)    | Growth rate:<br>E <sub>r</sub> C <sub>50</sub><br>E <sub>r</sub> C <sub>20</sub><br>E <sub>r</sub> C <sub>10</sub><br><br>Biomass:<br>E <sub>b</sub> C <sub>50</sub><br>E <sub>b</sub> C <sub>20</sub><br>E <sub>b</sub> C <sub>10</sub> | 70000 µg/L (nom)<br>32300 µg/L (nom)<br>25400 µg/L (nom)<br><br>31600 µg/L (nom)<br>17900 µg/L (nom)<br>14200 µg/L (nom) |
| Green microalgae<br>( <i>Pseudo-kirchneriella subcapitata</i> )                                                                                                                                                                                                                                                                                                                                                                                                                                                               | 3-PBA              | Chronic, 72 h (static)    | Growth rate:<br>E <sub>r</sub> C <sub>50</sub><br>E <sub>r</sub> C <sub>20</sub><br>E <sub>r</sub> C <sub>10</sub><br><br>Biomass:<br>E <sub>b</sub> C <sub>50</sub><br>E <sub>b</sub> C <sub>20</sub><br>E <sub>b</sub> C <sub>10</sub> | 85000 µg/L (nom)<br>44900 µg/L (nom)<br>28500 µg/L (nom)<br><br>38100 µg/L (nom)<br>11300 µg/L (nom)<br>6880 µg/L (nom)  |
| <b>Higher plant</b>                                                                                                                                                                                                                                                                                                                                                                                                                                                                                                           |                    |                           |                                                                                                                                                                                                                                          |                                                                                                                          |
| <i>Lemna gibba</i>                                                                                                                                                                                                                                                                                                                                                                                                                                                                                                            | Alpha-cypermethrin | Chronic, 7 d (static)     | Fronds number and dry weight:<br>E <sub>y</sub> C <sub>50</sub><br><br>E <sub>r</sub> C <sub>50</sub>                                                                                                                                    | ≥ 1.39 µg a.s./L<br>(mm)<br>≥ 1.39 µg a.s./L<br>(mm)                                                                     |
| Water milfoil<br>( <i>Myriophyllum elatinoides</i> )                                                                                                                                                                                                                                                                                                                                                                                                                                                                          | 3-PBA              | Chronic, 14 d (static)    | Growth inhibition, NOEC                                                                                                                                                                                                                  | 3280 µg/L (nom)                                                                                                          |
| <p><b>Further testing on aquatic organisms</b></p> <p><i>Acute risk to fish: Geomean approach</i></p> <p>Based on the available acute toxicity data for two fish species (<i>Oncorhynchus mykiss</i>, LC<sub>50</sub> = 2.3 µg a.s./L, and <i>Pimephales promelas</i>, LC<sub>50</sub> = 0.93 µg a.s./L), a geometric mean LC<sub>50</sub> of 1.46 µg a.s./L was calculated. Taking into account the assessment factor of 100 of the Tier 1 assessment, a geomean RAC<sub>SW,ac</sub> of 0.0146 µg a.s./L was determined.</p> |                    |                           |                                                                                                                                                                                                                                          |                                                                                                                          |

| Group                                                                                                                                                                                                                                                                                                                                                                                                                                                                                                                                                                                                                                                                                                                                                                                                                                                                                                                                                                                                                                                                                                                                                                                                                                                                                                                                                                                                                                                                                                                                                                                                                                                                                                                                                                                                                                                                                                                                                                                                                                                                                                                                                                                                                                                                                                                                                                                                                                                                                                                                                                                                                                                                                                                                                                                                                                                                                                                                                                                                                                                                                                                                                                                                                                                                                                                                                                                                                                                                                                                                                                                                                                                                                                                                                                                                                                                                                                                                                                                                                                                                                                                                                                                                                                                                                                                                                                                                                                                                                                                                                                                                                                                                                                                                                                                                                                                                                                                                                                                                                                                                                                                                                                                                                                                                                                                                                                                                                                                                                                                         | Test substance | Time-scale<br>(Test type) | End point | Toxicity <sup>1</sup> |
|-------------------------------------------------------------------------------------------------------------------------------------------------------------------------------------------------------------------------------------------------------------------------------------------------------------------------------------------------------------------------------------------------------------------------------------------------------------------------------------------------------------------------------------------------------------------------------------------------------------------------------------------------------------------------------------------------------------------------------------------------------------------------------------------------------------------------------------------------------------------------------------------------------------------------------------------------------------------------------------------------------------------------------------------------------------------------------------------------------------------------------------------------------------------------------------------------------------------------------------------------------------------------------------------------------------------------------------------------------------------------------------------------------------------------------------------------------------------------------------------------------------------------------------------------------------------------------------------------------------------------------------------------------------------------------------------------------------------------------------------------------------------------------------------------------------------------------------------------------------------------------------------------------------------------------------------------------------------------------------------------------------------------------------------------------------------------------------------------------------------------------------------------------------------------------------------------------------------------------------------------------------------------------------------------------------------------------------------------------------------------------------------------------------------------------------------------------------------------------------------------------------------------------------------------------------------------------------------------------------------------------------------------------------------------------------------------------------------------------------------------------------------------------------------------------------------------------------------------------------------------------------------------------------------------------------------------------------------------------------------------------------------------------------------------------------------------------------------------------------------------------------------------------------------------------------------------------------------------------------------------------------------------------------------------------------------------------------------------------------------------------------------------------------------------------------------------------------------------------------------------------------------------------------------------------------------------------------------------------------------------------------------------------------------------------------------------------------------------------------------------------------------------------------------------------------------------------------------------------------------------------------------------------------------------------------------------------------------------------------------------------------------------------------------------------------------------------------------------------------------------------------------------------------------------------------------------------------------------------------------------------------------------------------------------------------------------------------------------------------------------------------------------------------------------------------------------------------------------------------------------------------------------------------------------------------------------------------------------------------------------------------------------------------------------------------------------------------------------------------------------------------------------------------------------------------------------------------------------------------------------------------------------------------------------------------------------------------------------------------------------------------------------------------------------------------------------------------------------------------------------------------------------------------------------------------------------------------------------------------------------------------------------------------------------------------------------------------------------------------------------------------------------------------------------------------------------------------------------------------------------------------------------------|----------------|---------------------------|-----------|-----------------------|
| <p><i>Chronic risk to fish: refined exposure laboratory studies</i></p> <p>A refined exposure early-life stage (ELS) study was available, in which <i>Pimephales promelas</i> was exposed to two peaks of (nominal) 0.15 and 0.30 µg a.s./L, with an interval of 7 days. As no significant effects on survival or growth could be observed in any of the treatments, a NOEC of 0.30 µg a.s./L was derived from this study. This study was considered acceptable for use in a Tier 2 chronic risk assessment for fish. Based on the available FOCUS Step 2 exposure profile for the proposed permanent glasshouse use in fruiting vegetables (single application of 30 g a.s./ha and twofold application of 15 g a.s./ha), it was demonstrated that the exposure regime in the refined exposure ELS study covered the FOCUS Step 2 exposure profile. Thus, for these uses the Tier 2 RAC of <math>\geq 0.030</math> µg a.s./L could be considered a valid refinement. A low chronic risk to fish could be demonstrated for these uses.</p> <p>For the outdoor uses in cereals, oilseed rape and leafy vegetables, however, detailed exposure profiles for the different FOCUS scenarios are not available.</p> <p><i>Acute and chronic risk to aquatic invertebrates</i></p> <p>An additional acute toxicity study with <i>Daphnia magna</i>, investigating the influence of humic acid and green algae on the toxicity of BAS 310 55 I, was available. This study showed a marked reduction in toxicity when organic matter was present, which is the result of a lower bioavailability of alpha-cypermethrin to <i>Daphnia magna</i>. As a refinement, the higher EC<sub>50</sub> value of 0.52 µg a.s./L obtained from this study could potentially be used to derive a refined RAC<sub>SW</sub> for the acute risk assessment. However, based on the available Tier 1 toxicity data, <i>Daphnia magna</i> is not the most sensitive species following acute exposure. Therefore, a risk assessment based on the refined endpoint for <i>Daphnia magna</i> is not considered to fully cover the acute risk to aquatic invertebrates.</p> <p>A refined exposure chronic toxicity study was available, in which <i>Daphnia magna</i> was exposed to two peaks of up to 0.1060 µg a.s./L, applied with a 7 day interval. At the highest dose of 0.1060 µg a.s./L there was a slight but significant reduction in body length (3.2%), which was however not considered biologically relevant. Further, at the highest concentration of 0.1060 µg a.s./L, a mortality of 30% occurred whereas no mortality occurred in either the control and the solvent control. Although this effect is not statistically significant, it could be considered biologically relevant. Based on these results, a NOEC of 0.0875 µg a.s./L was derived from this study. This NOEC was considered acceptable for use in a Tier 2 chronic risk assessment. However, as <i>Daphnia magna</i> was not considered representative for all aquatic invertebrates (based on acute toxicity data and data from mesocosm studies, insects are shown to be more sensitive), this Tier 2 assessment is considered valid only for <i>Daphnia magna</i>.</p> <p>In total, eight mesocosm studies are available, in which alpha-cypermethrin was applied one, two or three times. In two of these studies, alpha-cypermethrin was applied as the representative formulation (BAS 310 55 I). In the other studies, alpha-cypermethrin was applied as the formulation BAS 310 03 I. As the toxicity of the two formulations is driven by the active ingredient and considered comparable with respect to effects on aquatic organisms, and the results from the mesocosm studies with both formulation are highly comparable, all available mesocosms can be considered together. In five out of the eight mesocosm studies, no analytical measurements were performed to measure the target concentrations in the pond water. The results from these studies were not considered suitable for use in a quantitative risk assessment (i.e. the NOEC and NOEAEC values from these studies cannot be used as a basis to derive a RAC value). However, as the results from these studies are highly similar to those from the fully reliable studies, they can be used as supportive information in a weight of evidence approach. From the available mesocosm data, an overall NOEC of 0.003 µg a.s./L and NOEAEC of 0.0385 µg a.s./L were derived for one application, and an overall NOEC of 0.004 µg a.s./L and NOEAEC of 0.017 µg a.s./L were derived for two applications of alpha-cypermethrin (for an interval of approximately one week).</p> <p>In addition to the mesocosm studies, additional higher tier studies have been submitted. For example a number of laboratory toxicity studies with additional aquatic invertebrate species are available, which confirm the finding of the mesocosm studies that <i>Chaoborus crystallinus</i> is the most sensitive aquatic invertebrate species.</p> <p>It was agreed at Pesticides Peer Review Meeting 177 that the overall mesocosm NOEC of 0.004 µg a.s./L could be used in a risk assessment for both 1 and 2 applications. Applying an AF of 2 to this NOEC, an <b>ETO-RAC of 0.002 µg a.s./L</b> was obtained. Initially, the RMS proposed a risk assessment based on the ecological recovery option. However, at Pesticides Peer Review Meeting 177 it was agreed not to consider the recovery</p> |                |                           |           |                       |



| Group                                                                                                                                                                                                                                                                                                                                                                                                                                                                                                                                                                                                                                                                                                                                      | Test substance     | Time-scale<br>(Test type)                      | End point                                                                                                                  | Toxicity <sup>1</sup>                                                          |
|--------------------------------------------------------------------------------------------------------------------------------------------------------------------------------------------------------------------------------------------------------------------------------------------------------------------------------------------------------------------------------------------------------------------------------------------------------------------------------------------------------------------------------------------------------------------------------------------------------------------------------------------------------------------------------------------------------------------------------------------|--------------------|------------------------------------------------|----------------------------------------------------------------------------------------------------------------------------|--------------------------------------------------------------------------------|
| <p>option as applicable in the risk assessment. This was based on the argument that species with a poor recovery potential are not well represented in the mesocosm studies. Furthermore, the exposure pattern of some of the most vulnerable species (i.e. <i>Gammarus</i>, <i>Cloeon dipterum</i>, identified on the basis of their life cycle and on the basis of the available laboratory studies) might differ from the one relevant for <i>Chaoborus</i>. While <i>Chaoborus</i> lives predominantly in the water column, where alpha-cypermethrin is likely to quickly disappear from, these other species are living more on the bottom/sediment surface, where alpha-cypermethrin is likely to be present for longer periods.</p> |                    |                                                |                                                                                                                            |                                                                                |
| Group                                                                                                                                                                                                                                                                                                                                                                                                                                                                                                                                                                                                                                                                                                                                      | Test substance     | Time-scale<br>(Test type)                      | End point                                                                                                                  | Toxicity <sup>1</sup>                                                          |
| Fathead minnow<br>( <i>Pimephales promelas</i> )                                                                                                                                                                                                                                                                                                                                                                                                                                                                                                                                                                                                                                                                                           | Alpha-cypermethrin | Chronic, 32 d (flow-through)<br>Pulse exposure | NOEC                                                                                                                       | 0.30 µg a.s./L<br>(nom)                                                        |
| Water flea<br>( <i>Daphnia magna</i> )                                                                                                                                                                                                                                                                                                                                                                                                                                                                                                                                                                                                                                                                                                     | BAS 310 55 I       | Acute, 48h (static)<br>Bioavailability study   | EC <sub>50</sub> , in M4 medium<br>EC <sub>50</sub> , in presence of humic acid<br>EC <sub>50</sub> , in presence of algae | 0.18 µg a.s./L<br>(mm)<br>0.52 µg a.s./L<br>(mm)<br>0.69 µg a.s./L<br>(mm)     |
| Water flea<br>( <i>Daphnia magna</i> )                                                                                                                                                                                                                                                                                                                                                                                                                                                                                                                                                                                                                                                                                                     | Alpha-cypermethrin | Chronic, 21 d (semi-static)<br>Pulse exposure  | NOEC                                                                                                                       | 0.0875 µg a.s./L<br>(mm)                                                       |
| Aquatic community in outdoor mesocosms; single treatment.<br><br>Endpoints: impact on macroinvertebrates, zooplankton and planktonic algae                                                                                                                                                                                                                                                                                                                                                                                                                                                                                                                                                                                                 | BAS 310 03 I       | 145 d, Outdoor mesocosm                        | NOEC<br>NOEAEC                                                                                                             | 0.003 µg a.s./L<br>(nom) <sup>3</sup><br>0.012 µg a.s./L<br>(nom) <sup>3</sup> |
| Aquatic community in outdoor mesocosms; single treatment.<br><br>Endpoints: impact on macroinvertebrates, zooplankton and planktonic algae                                                                                                                                                                                                                                                                                                                                                                                                                                                                                                                                                                                                 | BAS 310 03 I       | 126 d, Outdoor mesocosm                        | NOEC<br>NOEAEC                                                                                                             | 0.003 µg a.s./L<br>(nom)<br>0.015 µg a.s./L<br>(nom)                           |
| Aquatic community in outdoor mesocosms; three applications.<br><br>Endpoints: impact on macroinvertebrates, zooplankton and planktonic algae                                                                                                                                                                                                                                                                                                                                                                                                                                                                                                                                                                                               | BAS 310 03 I       | 119 d, Outdoor mesocosm                        | NOEC                                                                                                                       | 0.0006 µg a.s./L<br>(nom) <sup>3</sup>                                         |

| Group                                                                                                                                              | Test substance | Time-scale<br>(Test type)                                             | End point                                          | Toxicity <sup>1</sup>                                                                |
|----------------------------------------------------------------------------------------------------------------------------------------------------|----------------|-----------------------------------------------------------------------|----------------------------------------------------|--------------------------------------------------------------------------------------|
| Aquatic community in outdoor mesocosms; single treatment<br><br>Endpoints: impact on macroinvertebrates, zooplankton and planktonic algae          | BAS 310 03 I   | 139 d,<br>Outdoor mesocosm                                            | NOEAEC                                             | 0.015 µg a.s./L<br>(nom)                                                             |
| Aquatic community in outdoor mesocosms; one or three applications<br><br>Endpoints: impact on macroinvertebrates, zooplankton and planktonic algae | BAS 310 03 I   | 162 d,<br>Outdoor mesocosm                                            | NOEC<br><br>NOEAEC                                 | 0.0006 µg a.s./L<br>(nom) <sup>3</sup><br><br>0.015 µg a.s./L<br>(nom) <sup>3</sup>  |
| <i>Chaoborus crystallinus</i> in outdoor mesocosms; two applications                                                                               | BAS 310 03 I   | 8 weeks,<br>Outdoor mesocosm                                          | NOEC                                               | 0.020 µg a.s./L<br>(nom) <sup>3</sup>                                                |
| Aquatic community in outdoor mesocosms; two applications<br><br>Endpoints: impact on macroinvertebrates and zooplankton                            | BAS 310 55 I   | 62 d,<br>Outdoor mesocosm                                             | NOEC<br><br>NOEAEC                                 | 0.0006 µg a.s./L<br>(nom) <sup>3</sup><br><br>0.0135 µg a.s./L<br>(nom) <sup>3</sup> |
| Aquatic community in outdoor mesocosms; one or two applications<br><br>Endpoints: impact on macroinvertebrates, zooplankton and planktonic algae   | BAS 310 55 I   | 12 weeks,<br>Outdoor mesocosm                                         | NOEC<br><br>NOEAEC, 1 appl.<br><br>NOEAEC, 2 appl. | 0.00403 µg a.s./L (im)<br><br>0.017 µg a.s./L (im)<br><br>0.0385 µg a.s./L (im)      |
| Several species of aquatic invertebrates                                                                                                           | BAS 310 03 I   | Acute, 24 h (static)<br><br>Laboratory toxicity test                  | NOEC / EC <sub>50</sub>                            | 0.000011 - 4.7 µg a.s./L                                                             |
| Several species of aquatic macroinvertebrates                                                                                                      | BAS 310 03 I   | Acute, 48 and 96 h (static)<br><br>Laboratory toxicity test           | NOEC / EC <sub>50</sub>                            | 0.53 - 48.01 µg a.s./L                                                               |
| <i>Cloeon dipterum</i> & <i>Gammarus roeseli</i>                                                                                                   | BAS 310 03 I   | Acute, 1 to 28 d (static)<br><br>Laboratory toxicity test (microcosm) | NOEC / EC <sub>50</sub>                            | 0.003 - 7.3 µg a.s./L                                                                |

| Group                        | Test substance | Time-scale<br>(Test type)                            | End point                                                                                                                                                                                                                                                             | Toxicity <sup>1</sup> |
|------------------------------|----------------|------------------------------------------------------|-----------------------------------------------------------------------------------------------------------------------------------------------------------------------------------------------------------------------------------------------------------------------|-----------------------|
| <i>Chaoborus crystalinus</i> | -              | <i>Chaoborus</i> population development in mesocosms | Analysis of raw data of 19 mesocosm studies provides information on <i>Chaoborus</i> populations and their influence on the zooplankton community structure                                                                                                           |                       |
| Chironomid midge larvae      | Dominex 100 EC | Field efficacy trial                                 | After application of 10 to 30 g a.s./ha (trial 1) or 6 to 20 g a.s./ha (trial 2): A clear effect on chironomid larvae after application of the test item, followed by recovery. No complete recovery by the end of the study (29 days in trial 1; 24 days in trial 2) |                       |

#### Potential endocrine disrupting properties (Annex Part A, point 8.2.3)

Based on the specific long-term *in vivo* studies reported in the DRAR there are no indications that alpha-cypermethrin has endocrine-specific effects on fish. Further, the results from the mammalian assays also do not indicate specific endocrine-disruptive activity of alpha-cypermethrin. However, as there are currently no defined criteria for identifying endocrine disruptors, it is difficult to draw a firm conclusion.

At Pesticides Peer Review Meeting 175 on mammalian toxicology, a data gap for a male pubertal assay was set. At Pesticides Peer Review Meeting 177 on ecotoxicology, the majority of the experts agreed that, pending on the outcome of the data gap in the mammalian toxicology section, further consideration may be needed on potential endocrine effects in non-target organisms.

<sup>1</sup> (<sub>nom</sub>) nominal concentration; (<sub>mm</sub>) mean measured concentration; (<sub>im</sub>) initial measured concentrations; prep.: preparation; a.s.: active substance

<sup>2</sup> As two of the validity criteria of the relevant test guideline (OECD 210) were not fulfilled, this study is formally not valid. However, given the fact that there was a clear dose-response relationship, and the endpoint was in the range that would be expected based on data for related substances, it was agreed at Pesticides Peer Review Expert Meeting 177 that this study can be used with care in the risk assessment, but only because there are no suitable alternatives.

<sup>3</sup> Endpoint obtained from a mesocosm study where the concentration of the test item in the ponds was not analytically verified. This endpoint is not acceptable for use in a quantitative risk assessment (i.e. cannot be used as a basis to derive a RAC values). However, it can be used as additional information in the risk assessment for aquatic invertebrates.

#### Bioconcentration in fish (Annex Part A, point 8.2.2.3)

|                                                                                     | Alpha-cypermethrin | DCVA | 3-PBA              | 3-PBAld           | M310I017 | Carboxamide       |
|-------------------------------------------------------------------------------------|--------------------|------|--------------------|-------------------|----------|-------------------|
| logP <sub>OW</sub>                                                                  | 5.8                | 3.15 | 2.48 <sup>2)</sup> | 3.5 <sup>2)</sup> | unknown  | 5.5 <sup>2)</sup> |
| Steady-state bioconcentration factor (BCF)<br>(total wet weight)                    | 910 <sup>1)</sup>  | -    | -                  | -                 | -        | -                 |
| Uptake/depuration kinetics BCF<br>(total wet weight/normalised to 5% lipid content) | -                  | -    | -                  | -                 | -        | -                 |
| Annex VI Trigger for the bioconcentration factor                                    | -                  | -    | -                  | -                 | -        | -                 |
| Clearance time (days) (CT <sub>50</sub> )                                           | 6.9-8.6 days       | -    | -                  | -                 | -        | -                 |
| (CT <sub>90</sub> )                                                                 | -                  | -    | -                  | -                 | -        | -                 |

|                                                                                 |            |   |   |   |   |   |
|---------------------------------------------------------------------------------|------------|---|---|---|---|---|
| Level and nature of residues (%) in organisms after the 14 day depuration phase | -          | - | - | - | - | - |
| Higher tier study                                                               | Not needed |   |   |   |   |   |

<sup>1)</sup> based on total <sup>14</sup>C. As the study from which this bioconcentration factor was derived was performed in accordance with a previous version of OECD Test Guideline 305, the lipid content of the fish tissue was not measured. It was therefore not possible to normalize the bioconcentration factor to 5% lipid content.

Additional uncertainties regarding this BCF value were identified at Pesticides Peer Review Expert Meeting 177, which are related to the exposure route in the study (exposure through the water phase). According to OECD Test Guideline 305, testing via aqueous exposure becomes difficult for substances with a low  $P_{OW} > 5$  and a low water solubility (such as alpha-cypermethrin). Testing via dietary exposure might result in a different BCF value.

<sup>2)</sup> no data was available within the alpha-cypermethrin renewal dossier to determine a log  $P_{OW}$  for these metabolites. These log  $P_{OW}$  values were obtained from the DRAR for renewal of the active substance cypermethrin (Belgium 2017).

### Regulatory acceptable concentrations used in the risk assessment

| Alpha- cypermethrin       |                       |                                    |                                        |                                                  |     |                              |
|---------------------------|-----------------------|------------------------------------|----------------------------------------|--------------------------------------------------|-----|------------------------------|
|                           | Species group         | Level of assessment                | Most sensitive species                 | Endpoint                                         | AF  | RAC                          |
| Acute effect assessment   | Fish                  | Tier 1                             | <i>Pimephales promelas</i>             | LC <sub>50</sub> = 0.93 µg a.s./L                | 100 | 0.0093 µg a.s./L             |
|                           |                       | Tier 2 (geomean-approach)          | Data for 2 fish species                | Geomean LC <sub>50</sub> = 1.46 µg a.s./L        | 100 | 0.0146 µg a.s./L             |
|                           | Aquatic invertebrates | Tier 1                             | <i>Chironomus riparius</i>             | EC <sub>50</sub> = 0.0126 µg a.s./L              | 100 | 0.000126 µg a.s./L           |
|                           |                       | Tier 3 (mesocosms)                 | Natural populations in ponds           | NOEC = 0.004 µg a.s./L                           | 2   | 0.002 µg a.s./L <sup>1</sup> |
| Chronic effect assessment | Fish                  | Tier 1                             | <i>Pimephales promelas</i>             | NOEC = 0.03 µg a.s./L                            | 10  | 0.003 µg a.s./L              |
|                           |                       | Tier 2 (refined exposure approach) | <i>Pimephales promelas</i>             | NOEC = 0.30 µg a.s./L                            | 10  | 0.030 µg a.s./L <sup>2</sup> |
|                           | Aquatic invertebrates | Tier 1                             | <i>Daphnia magna</i>                   | NOEC = 0.0177 µg a.s./L                          | 10  | 0.00177 µg a.s./L            |
|                           |                       | Tier 3 (mesocosms)                 | Natural populations in ponds           | NOEC = 0.004 µg a.s./L                           | 2   | 0.002 µg a.s./L <sup>1</sup> |
|                           |                       | Tier 1                             | <i>Chironomus riparius</i>             | NOEC = 45.0 µg a.s./kg dry sediment              | 10  | 4.5 µg a.s./kg dry sediment  |
|                           | Algae                 | Tier 1                             | <i>Anabaena flos-aquae</i>             | E <sub>r</sub> C <sub>50</sub> ≥ 27.0 µg a.s./L  | 10  | ≥ 2.70 µg a.s./L             |
|                           | Aquatic plants        | Tier 1                             | <i>Lemna gibba</i>                     | E <sub>r</sub> C <sub>50</sub> ≥ 1.39 µg a.s./L  | 10  | ≥ 0.139 µg a.s./L            |
| Metabolite DCVA           |                       |                                    |                                        |                                                  |     |                              |
| Acute effect assessment   | Fish                  | Tier 1                             | <i>Lepomis macrochirus</i>             | LC <sub>50</sub> > 102800 µg a.s./L              | 100 | 1028 µg/L                    |
|                           | Aquatic invertebrates | Tier 1                             | <i>Daphnia magna</i>                   | EC <sub>50</sub> = 61900 µg a.s./L               | 100 | 619 µg/L                     |
| Chronic effect assessment | Algae                 | Tier 1                             | <i>Pseudokirchneriella subcapitata</i> | E <sub>r</sub> C <sub>50</sub> = 70000 µg a.s./L | 10  | 7000 µg/L                    |
| Metabolite 3-PBA          |                       |                                    |                                        |                                                  |     |                              |
| Acute effect              | Fish                  | Tier 1                             | <i>Lepomis</i>                         | LC <sub>50</sub> > 103200                        | 100 | 1032 µg/L                    |

|                           |                       |        |                                        |                                                     |     |               |
|---------------------------|-----------------------|--------|----------------------------------------|-----------------------------------------------------|-----|---------------|
| assessment                |                       |        | <i>macrochirus</i>                     | µg a.s./L                                           |     |               |
|                           | Aquatic invertebrates | Tier 1 | <i>Daphnia magna</i>                   | EC <sub>50</sub> = 39000<br>µg a.s./L               | 100 | 390 µg/L      |
| Chronic effect assessment | Algae                 | Tier 1 | <i>Pseudokirchneriella subcapitata</i> | E <sub>r</sub> C <sub>50</sub> = 85000<br>µg a.s./L | 10  | 8500 µg/L     |
|                           | Aquatic plants        | Tier 1 | <i>Myriophyllum elatinoides</i>        | NOEC = 3280<br>µg a.s./L                            | 10  | 328 µg a.s./L |

Notes: AF: Assessment Factor; <sup>1</sup>ETO-RAC (ecological threshold option); <sup>2</sup>Endpoint currently only used for the proposed permanent glasshouse use of BAS 310 55 I in cucumber/courgette, as no detailed FOCUS exposure profiles are available for the proposed outdoor uses.

**Comparison of the RAC and endpoint for the most sensitive aquatic organisms (Regulation (EU) N° 284/2013, Annex Part A, point 10.2)**

Note that below only the comparison of the respective endpoints and the RAC from the highest available Tier is included

**FOCUS<sub>sw</sub> step 1-3 – Comparison of RACs and global maximum PEC<sub>SW/SED</sub> for alpha-cypermethrin – Cereals at 1-2 x 10 g a.s./ha (the worst-case PEC<sub>SW</sub> and PEC<sub>SED</sub> for either spring or winter cereals are used).**

| Scenario                       | fish acute              | fish chronic               | Aquatic invertebrates<br>(acute and chronic) | Algae                      | Higher plant       | Sed. Dwelling<br>organisms<br>prolonged |
|--------------------------------|-------------------------|----------------------------|----------------------------------------------|----------------------------|--------------------|-----------------------------------------|
|                                | <i>Geomean approach</i> | <i>Pimephales promelas</i> | <i>Natural populations in<br/>ponds</i>      | <i>Anabaena flos-aquae</i> | <i>Lemna gibba</i> | <i>Chironomus riparius</i>              |
| Level of assessment            | Tier 2                  | Tier 1                     | Tier 3                                       | Tier 1                     | Tier 1             | Tier 1                                  |
| <b>RAC</b>                     | 0.0146 µg/L             | 0.003 µg/L                 | 0.002 µg/L <sup>1</sup>                      | ≥ 2.70 µg/L                | 0.139 µg/L         | 4.5 µg/kg dry<br>sediment               |
| <b>FOCUS Step 1 PEC values</b> | <b>0.201</b>            | <b>0.201</b>               | <b>0.201</b>                                 | 0.201                      | <b>0.201</b>       | <b>49.869</b>                           |
| <b>FOCUS Step 2 PEC values</b> |                         |                            |                                              |                            |                    |                                         |
| North Europe                   | <b>0.184</b>            | <b>0.184</b>               | <b>0.184</b>                                 | 0.184                      | <b>0.184</b>       | <b>14987</b>                            |
| South Europe                   | <b>0.184</b>            | <b>0.184</b>               | <b>0.184</b>                                 | 0.184                      | <b>0.184</b>       | <b>8.108</b>                            |
| <b>FOCUS Step 3 PEC values</b> |                         |                            |                                              |                            |                    |                                         |
| D1 / ditch                     | <b>0.056</b>            | <b>0.056</b>               | <b>0.056</b>                                 | -                          | 0.056              | 0.630                                   |
| D1 / stream                    | <b>0.046</b>            | <b>0.046</b>               | <b>0.046</b>                                 | -                          | 0.046              | 0.270                                   |
| D2 / ditch                     | <b>0.056</b>            | <b>0.056</b>               | <b>0.056</b>                                 | -                          | 0.056              | 0.583                                   |
| D2 / stream                    | <b>0.047</b>            | <b>0.047</b>               | <b>0.047</b>                                 | -                          | 0.047              | 0.419                                   |
| D3 / ditch                     | <b>0.052</b>            | <b>0.052</b>               | <b>0.052</b>                                 | -                          | 0.052              | 0.292                                   |
| D4 / pond                      | 0.002                   | 0.002                      | <b>0.002</b>                                 | -                          | 0.002              | 0.048                                   |
| D4 / stream                    | <b>0.045</b>            | <b>0.045</b>               | <b>0.045</b>                                 | -                          | 0.045              | 0.151                                   |
| D5 / pond                      | 0.002                   | 0.002                      | <b>0.002</b>                                 | -                          | 0.002              | 0.049                                   |
| D5 / stream                    | <b>0.048</b>            | <b>0.048</b>               | <b>0.048</b>                                 | -                          | 0.048              | 0.177                                   |
| D6 / ditch                     | <b>0.052</b>            | <b>0.052</b>               | <b>0.052</b>                                 | -                          | 0.052              | 0.569                                   |
| R1 / pond                      | 0.002                   | 0.002                      | <b>0.002</b>                                 | -                          | 0.002              | 0.058                                   |
| R1 / stream                    | <b>0.034</b>            | <b>0.034</b>               | <b>0.034</b>                                 | -                          | 0.034              | 0.331                                   |
| R3 / stream                    | <b>0.048</b>            | <b>0.048</b>               | <b>0.048</b>                                 | -                          | 0.048              | 0.169                                   |
| R4 / stream                    | <b>0.034</b>            | <b>0.034</b>               | <b>0.034</b>                                 | -                          | 0.034              | 0.412                                   |

Note: PEC values in bold indicate that the PEC<sub>SW/SED</sub> exceeds the RAC, and thus that further consideration is necessary; <sup>1</sup>ETO-RAC (ecological threshold option)

**FOCUS<sub>sw</sub> step 4 – Comparison of RACs and global maximum PEC<sub>sw</sub> for alpha-cypermethrin – Cereals at 1-2 x 10 g a.s./ha (the worst-case PEC<sub>sw</sub> and PEC<sub>SED</sub> for either spring or winter cereals are used).**

| Scenario                       | fish acute              |        |              |               | fish chronic               |        |              |               | Aquatic invertebrates (acute and chronic) |              |              |               |
|--------------------------------|-------------------------|--------|--------------|---------------|----------------------------|--------|--------------|---------------|-------------------------------------------|--------------|--------------|---------------|
|                                | <i>Geomean approach</i> |        |              |               | <i>Pimephales promelas</i> |        |              |               | <i>Natural populations in ponds</i>       |              |              |               |
| Level of assessment            | Tier 2                  |        |              |               | Tier 1                     |        |              |               | Tier 3                                    |              |              |               |
| RAC                            | 0.0146 µg/L             |        |              |               | 0.003 µg/L                 |        |              |               | 0.002 µg/L <sup>1</sup>                   |              |              |               |
| Mitigation options             | 75% N                   | 95% N  | 5 m D        | 5 m D + 50% N | 75% N                      | 95% N  | 5 m D        | 5 m D + 50% N | 75% N                                     | 95% N        | 5 m D        | 5 m D + 50% N |
| <b>FOCUS Step 4 PEC values</b> |                         |        |              |               |                            |        |              |               |                                           |              |              |               |
| D1 / ditch                     | 0.013                   | 0.003  | 0.014        | 0.007         | <b>0.013</b>               | 0.003  | <b>0.014</b> | <b>0.007</b>  | <b>0.013</b>                              | <b>0.003</b> | <b>0.014</b> | <b>0.007</b>  |
| D1 / stream                    | 0.011                   | 0.002  | <b>0.017</b> | 0.008         | <b>0.011</b>               | 0.002  | <b>0.017</b> | <b>0.008</b>  | <b>0.011</b>                              | 0.002        | <b>0.017</b> | <b>0.008</b>  |
| D2 / ditch                     | 0.013                   | 0.003  | 0.014        | 0.007         | <b>0.013</b>               | 0.003  | <b>0.014</b> | <b>0.007</b>  | <b>0.013</b>                              | <b>0.003</b> | <b>0.014</b> | <b>0.007</b>  |
| D2 / stream                    | 0.012                   | 0.002  | <b>0.017</b> | 0.008         | <b>0.012</b>               | 0.002  | <b>0.017</b> | <b>0.008</b>  | <b>0.012</b>                              | 0.002        | <b>0.017</b> | <b>0.008</b>  |
| D3 / ditch                     | 0.013                   | 0.003  | 0.014        | 0.007         | <b>0.013</b>               | 0.003  | <b>0.014</b> | <b>0.007</b>  | <b>0.013</b>                              | <b>0.003</b> | <b>0.014</b> | <b>0.007</b>  |
| D4 / pond                      | <0.001                  | <0.001 | 0.002        | <0.001        | <0.001                     | <0.001 | 0.002        | <0.001        | <0.001                                    | <0.001       | 0.002        | <0.001        |
| D4 / stream                    | 0.011                   | 0.002  | <b>0.016</b> | 0.008         | <b>0.011</b>               | 0.002  | <b>0.016</b> | <b>0.008</b>  | <b>0.011</b>                              | 0.002        | <b>0.016</b> | <b>0.008</b>  |
| D5 / pond                      | <0.001                  | <0.001 | 0.002        | <0.001        | <0.001                     | <0.001 | 0.002        | <0.001        | <0.001                                    | <0.001       | 0.002        | <0.001        |
| D5 / stream                    | 0.012                   | 0.003  | <b>0.018</b> | 0.009         | <b>0.012</b>               | 0.003  | <b>0.018</b> | <b>0.009</b>  | <b>0.012</b>                              | <b>0.003</b> | <b>0.018</b> | <b>0.009</b>  |
| D6 / ditch                     | 0.013                   | 0.003  | 0.014        | 0.007         | <b>0.013</b>               | 0.003  | <b>0.014</b> | <b>0.007</b>  | <b>0.013</b>                              | <b>0.003</b> | <b>0.014</b> | <b>0.007</b>  |
| R1 / pond                      | <0.001                  | <0.001 | 0.002        | <0.001        | <0.001                     | <0.001 | 0.002        | <0.001        | <0.001                                    | <0.001       | 0.002        | <0.001        |
| R1 / stream                    | 0.009                   | 0.002  | 0.013        | 0.006         | <b>0.009</b>               | 0.002  | <b>0.013</b> | <b>0.006</b>  | <b>0.009</b>                              | 0.002        | <b>0.013</b> | <b>0.006</b>  |
| R3 / stream                    | 0.012                   | 0.003  | <b>0.018</b> | 0.009         | <b>0.012</b>               | 0.003  | <b>0.018</b> | <b>0.009</b>  | <b>0.012</b>                              | <b>0.003</b> | <b>0.018</b> | <b>0.009</b>  |
| R4 / stream                    | 0.009                   | 0.002  | 0.013        | 0.006         | <b>0.009</b>               | 0.002  | <b>0.013</b> | <b>0.006</b>  | <b>0.009</b>                              | 0.002        | <b>0.013</b> | <b>0.006</b>  |

Notes: D = Drift mitigation by no-spray buffer zones; N = Drift mitigation by drift reducing nozzles; values in bold exceed the relevant RAC, indicating an unacceptable risk; <sup>1</sup>ETO-RAC (ecological threshold option)

**FOCUS<sub>sw</sub> step 1-3 – Comparison of RACs and global maximum PEC<sub>SW/SED</sub> for alpha-cypermethrin – Winter oilseed rape at 1-2 x 10 g a.s./ha**

| Scenario                       | fish acute              | fish chronic               | Aquatic invertebrates<br>(acute and chronic) | Algae                      | Higher plant       | Sed. Dwelling<br>organisms<br>prolonged |
|--------------------------------|-------------------------|----------------------------|----------------------------------------------|----------------------------|--------------------|-----------------------------------------|
|                                | <i>Geomean approach</i> | <i>Pimephales promelas</i> | <i>Natural populations in<br/>ponds</i>      | <i>Anabaena flos-aquae</i> | <i>Lemna gibba</i> | <i>Chironomus riparius</i>              |
| Level of assessment            | Tier 2                  | Tier 1                     | Tier 3                                       | Tier 1                     | Tier 1             | Tier 1                                  |
| <b>RAC</b>                     | 0.0146 µg/L             | 0.003 µg/L                 | 0.002 µg/L <sup>1</sup>                      | ≥ 2.70 µg/L                | 0.139 µg/L         | 4.5 µg/kg dry<br>sediment               |
| <b>FOCUS Step 1 PEC values</b> | <b>0.201</b>            | <b>0.201</b>               | <b>0.201</b>                                 | 0.201                      | <b>0.201</b>       | <b>49.869</b>                           |
| <b>FOCUS Step 2 PEC values</b> |                         |                            |                                              |                            |                    |                                         |
| North Europe                   | <b>0.184</b>            | <b>0.184</b>               | <b>0.184</b>                                 | 0.184                      | <b>0.184</b>       | <b>14987</b>                            |
| South Europe                   | <b>0.184</b>            | <b>0.184</b>               | <b>0.184</b>                                 | 0.184                      | <b>0.184</b>       | <b>8.108</b>                            |
| <b>FOCUS Step 3 PEC values</b> |                         |                            |                                              |                            |                    |                                         |
| D2 / ditch                     | <b>0.053</b>            | <b>0.053</b>               | <b>0.053</b>                                 | -                          | 0.053              | 0.475                                   |
| D2 / stream                    | <b>0.047</b>            | <b>0.047</b>               | <b>0.047</b>                                 | -                          | 0.047              | 0.328                                   |
| D3 / ditch                     | <b>0.052</b>            | <b>0.052</b>               | <b>0.052</b>                                 | -                          | 0.052              | 0.292                                   |
| D4 / pond                      | 0.002                   | 0.002                      | <b>0.002</b>                                 | -                          | 0.002              | 0.050                                   |
| D4 / stream                    | <b>0.044</b>            | <b>0.044</b>               | <b>0.044</b>                                 | -                          | 0.044              | 0.117                                   |
| D5 / pond                      | 0.002                   | 0.002                      | <b>0.002</b>                                 | -                          | 0.002              | 0.052                                   |
| D5 / stream                    | <b>0.044</b>            | <b>0.044</b>               | <b>0.044</b>                                 | -                          | 0.044              | 0.080                                   |
| R1 / pond                      | 0.002                   | 0.002                      | <b>0.002</b>                                 | -                          | 0.002              | 0.057                                   |
| R1 / stream                    | <b>0.034</b>            | <b>0.034</b>               | <b>0.034</b>                                 | -                          | 0.034              | 0.338                                   |
| R3 / stream                    | <b>0.048</b>            | <b>0.048</b>               | <b>0.048</b>                                 | -                          | 0.048              | 0.227                                   |

Note: PEC values in bold indicate that the PEC<sub>SW/SED</sub> exceeds the RAC, and thus that further consideration is necessary; <sup>1</sup>ETO-RAC (ecological threshold option)



**FOCUS<sub>sw</sub> step 4 – Comparison of RACs and global maximum PEC<sub>sw</sub> for alpha-cypermethrin – Winter oilseed rape at 1-2 x 10 g a.s./ha**

| Scenario                       | fish acute              |        |              |               | fish chronic               |        |              |               | Aquatic invertebrates (acute and chronic) |              |              |               |
|--------------------------------|-------------------------|--------|--------------|---------------|----------------------------|--------|--------------|---------------|-------------------------------------------|--------------|--------------|---------------|
|                                | <i>Geomean approach</i> |        |              |               | <i>Pimephales promelas</i> |        |              |               | <i>Natural populations in ponds</i>       |              |              |               |
| Level of assessment            | Tier 2                  |        |              |               | Tier 1                     |        |              |               | Tier 3                                    |              |              |               |
| RAC                            | 0.0146 µg/L             |        |              |               | 0.003 µg/L                 |        |              |               | 0.002 µg/L <sup>1</sup>                   |              |              |               |
| Mitigation options             | 75% N                   | 95% N  | 5 m D        | 5 m D + 50% N | 75% N                      | 95% N  | 5 m D        | 5 m D + 50% N | 75% N                                     | 95% N        | 5 m D        | 5 m D + 50% N |
| <b>FOCUS Step 4 PEC values</b> |                         |        |              |               |                            |        |              |               |                                           |              |              |               |
| D2 / ditch                     | 0.013                   | 0.003  | 0.014        | 0.007         | <b>0.013</b>               | 0.003  | <b>0.014</b> | <b>0.007</b>  | <b>0.013</b>                              | <b>0.003</b> | <b>0.014</b> | <b>0.007</b>  |
| D2 / stream                    | 0.012                   | 0.002  | <b>0.017</b> | 0.008         | <b>0.012</b>               | 0.002  | <b>0.017</b> | <b>0.008</b>  | <b>0.012</b>                              | 0.002        | <b>0.017</b> | <b>0.008</b>  |
| D3 / ditch                     | 0.013                   | 0.003  | 0.014        | 0.007         | <b>0.013</b>               | 0.003  | <b>0.014</b> | <b>0.007</b>  | <b>0.013</b>                              | <b>0.003</b> | <b>0.014</b> | <b>0.007</b>  |
| D4 / pond                      | <0.001                  | <0.001 | 0.002        | <0.001        | <0.001                     | <0.001 | 0.002        | <0.001        | <0.001                                    | <0.001       | 0.002        | <0.001        |
| D4 / stream                    | 0.011                   | 0.002  | <b>0.016</b> | 0.008         | <b>0.011</b>               | 0.002  | <b>0.016</b> | <b>0.008</b>  | <b>0.011</b>                              | 0.002        | <b>0.016</b> | <b>0.008</b>  |
| D5 / pond                      | <0.001                  | <0.001 | 0.002        | <0.001        | <0.001                     | <0.001 | 0.002        | <0.001        | <0.001                                    | <0.001       | 0.002        | <0.001        |
| D5 / stream                    | 0.011                   | 0.002  | <b>0.016</b> | 0.008         | <b>0.011</b>               | 0.002  | <b>0.016</b> | <b>0.008</b>  | <b>0.011</b>                              | 0.002        | <b>0.016</b> | <b>0.008</b>  |
| R1 / pond                      | <0.001                  | <0.001 | 0.002        | <0.001        | <0.001                     | <0.001 | 0.002        | <0.001        | <0.001                                    | <0.001       | 0.002        | <0.001        |
| R1 / stream                    | 0.009                   | 0.002  | 0.013        | 0.006         | <b>0.009</b>               | 0.002  | <b>0.013</b> | <b>0.006</b>  | <b>0.009</b>                              | 0.002        | <b>0.013</b> | <b>0.006</b>  |
| R3 / stream                    | 0.012                   | 0.003  | <b>0.018</b> | 0.009         | <b>0.012</b>               | 0.003  | <b>0.018</b> | <b>0.009</b>  | <b>0.012</b>                              | <b>0.003</b> | <b>0.018</b> | <b>0.009</b>  |

Notes: D = Drift mitigation by no-spray buffer zones; N = Drift mitigation by drift reducing nozzles; values in bold exceed the relevant RAC, indicating an unacceptable risk;  
<sup>1</sup>ETO-RAC (ecological threshold option)

**FOCUS<sub>sw</sub> step 1-3 – Comparison of RACs and global maximum PEC<sub>SW/SED</sub> for alpha-cypermethrin – Leafy vegetables (lettuce and leafy cabbage) at 1-2 x 10 g a.s./ha**

| Scenario                       | fish acute              | fish chronic               | Aquatic invertebrates<br>(acute and chronic) | Algae                      | Higher plant       | Sed. Dwelling<br>organisms<br>prolonged |
|--------------------------------|-------------------------|----------------------------|----------------------------------------------|----------------------------|--------------------|-----------------------------------------|
|                                | <i>Geomean approach</i> | <i>Pimephales promelas</i> | <i>Natural populations in<br/>ponds</i>      | <i>Anabaena flos-aquae</i> | <i>Lemna gibba</i> | <i>Chironomus riparius</i>              |
| Level of assessment            | Tier 2                  | Tier 1                     | Tier 3                                       | Tier 1                     | Tier 1             | Tier 1                                  |
| <b>RAC</b>                     | 0.0146 µg/L             | 0.003 µg/L                 | 0.002 µg/L <sup>1</sup>                      | ≥ 2.70 µg/L                | 0.139 µg/L         | 4.5 µg/kg dry<br>sediment               |
| <b>FOCUS Step 1 PEC values</b> | <b>0.201</b>            | <b>0.201</b>               | <b>0.201</b>                                 | 0.201                      | <b>0.201</b>       | <b>49.869</b>                           |
| <b>FOCUS Step 2 PEC values</b> |                         |                            |                                              |                            |                    |                                         |
| North Europe                   | <b>0.184</b>            | <b>0.184</b>               | <b>0.184</b>                                 | 0.184                      | <b>0.184</b>       | <b>14987</b>                            |
| South Europe                   | <b>0.184</b>            | <b>0.184</b>               | <b>0.184</b>                                 | 0.184                      | <b>0.184</b>       | <b>8.108</b>                            |
| <b>FOCUS Step 3 PEC values</b> |                         |                            |                                              |                            |                    |                                         |
| D3 / ditch                     | <b>0.052</b>            | <b>0.052</b>               | <b>0.052</b>                                 | -                          | 0.052              | 0.311                                   |
| D4 / pond                      | 0.002                   | 0.002                      | <b>0.002</b>                                 | -                          | 0.002              | 0.051                                   |
| D4 / stream                    | <b>0.041</b>            | <b>0.041</b>               | <b>0.041</b>                                 | -                          | 0.041              | 0.054                                   |
| D6 / ditch                     | <b>0.051</b>            | <b>0.051</b>               | <b>0.051</b>                                 | -                          | 0.051              | 0.200                                   |
| R1 / pond                      | 0.002                   | 0.002                      | <b>0.002</b>                                 | -                          | 0.002              | 0.136                                   |
| R1 / stream                    | <b>0.034</b>            | <b>0.034</b>               | <b>0.034</b>                                 | -                          | 0.034              | 2.839                                   |
| R2 / stream                    | <b>0.046</b>            | <b>0.046</b>               | <b>0.046</b>                                 | -                          | 0.046              | <b>5.388</b>                            |
| R3 / stream                    | <b>0.048</b>            | <b>0.048</b>               | <b>0.048</b>                                 | -                          | 0.048              | 2.318                                   |
| R4 / stream                    | <b>0.034</b>            | <b>0.034</b>               | <b>0.034</b>                                 | -                          | 0.034              | 2.620                                   |

Note: PEC values in bold indicate that the PEC<sub>SW/SED</sub> exceeds the RAC, and thus that further consideration is necessary; <sup>1</sup>ETO-RAC (ecological threshold option)

**FOCUS<sub>sw</sub> step 4 – Comparison of RACs and global maximum PEC<sub>sw</sub> for alpha-cypermethrin – Leafy vegetables (lettuce and leafy cabbage) at 1-2 x 10 g a.s./ha**

| Scenario                       | fish acute              |        |              |               | fish chronic               |        |              |               | Aquatic invertebrates (acute and chronic) |              |              |               |
|--------------------------------|-------------------------|--------|--------------|---------------|----------------------------|--------|--------------|---------------|-------------------------------------------|--------------|--------------|---------------|
|                                | <i>Geomean approach</i> |        |              |               | <i>Pimephales promelas</i> |        |              |               | <i>Natural populations in ponds</i>       |              |              |               |
| Level of assessment            | Tier 2                  |        |              |               | Tier 1                     |        |              |               | Tier 3                                    |              |              |               |
| RAC                            | 0.0146 µg/L             |        |              |               | 0.003 µg/L                 |        |              |               | 0.002 µg/L <sup>1</sup>                   |              |              |               |
| Mitigation options             | 75% N                   | 95% N  | 5 m D        | 5 m D + 50% N | 75% N                      | 95% N  | 5 m D        | 5 m D + 50% N | 75% N                                     | 95% N        | 5 m D        | 5 m D + 50% N |
| <b>FOCUS Step 4 PEC values</b> |                         |        |              |               |                            |        |              |               |                                           |              |              |               |
| D3 / ditch                     | 0.013                   | 0.003  | 0.014        | 0.007         | <b>0.013</b>               | 0.003  | <b>0.014</b> | <b>0.007</b>  | <b>0.013</b>                              | <b>0.003</b> | <b>0.014</b> | <b>0.007</b>  |
| D4 / pond                      | <0.001                  | <0.001 | 0.002        | <0.001        | <0.001                     | <0.001 | 0.002        | <0.001        | <0.001                                    | <0.001       | 0.002        | <0.001        |
| D4 / stream                    | 0.010                   | 0.002  | <b>0.015</b> | 0.007         | <b>0.010</b>               | 0.002  | <b>0.015</b> | <b>0.007</b>  | <b>0.010</b>                              | 0.002        | <b>0.015</b> | <b>0.007</b>  |
| D6 / ditch                     | 0.013                   | 0.003  | 0.014        | 0.007         | <b>0.013</b>               | 0.003  | <b>0.014</b> | <b>0.007</b>  | <b>0.013</b>                              | <b>0.003</b> | <b>0.014</b> | <b>0.007</b>  |
| R1 / pond                      | <0.001                  | <0.001 | 0.002        | <0.001        | <0.001                     | <0.001 | 0.002        | <0.001        | <0.001                                    | <0.001       | 0.002        | <0.001        |
| R1 / stream                    | 0.009                   | 0.002  | 0.013        | 0.006         | <b>0.009</b>               | 0.002  | <b>0.013</b> | <b>0.006</b>  | <b>0.009</b>                              | 0.002        | <b>0.013</b> | <b>0.006</b>  |
| R2 / stream                    | 0.012                   | 0.002  | <b>0.017</b> | 0.008         | <b>0.012</b>               | 0.002  | <b>0.017</b> | <b>0.008</b>  | <b>0.012</b>                              | 0.002        | <b>0.017</b> | <b>0.008</b>  |
| R3 / stream                    | 0.012                   | 0.003  | <b>0.018</b> | 0.009         | <b>0.012</b>               | 0.003  | <b>0.018</b> | <b>0.009</b>  | <b>0.012</b>                              | <b>0.003</b> | <b>0.018</b> | <b>0.009</b>  |
| R4 / stream                    | 0.009                   | 0.002  | 0.013        | 0.006         | <b>0.009</b>               | 0.002  | <b>0.013</b> | <b>0.006</b>  | <b>0.009</b>                              | 0.002        | <b>0.013</b> | <b>0.006</b>  |

Notes: D = Drift mitigation by no-spray buffer zones; N = Drift mitigation by drift reducing nozzles; values in bold exceed the relevant RAC, indicating an unacceptable risk;  
<sup>1</sup>ETO-RAC (ecological threshold option)

**FOCUS<sub>sw</sub> step 1-3 – Comparison of RACs and global maximum PEC<sub>SW/SED</sub> for alpha-cypermethrin – Leafy vegetables (lettuce and leafy cabbage) at 1 x 20 g a.s./ha**

| Scenario                       | fish acute              | fish chronic               | Aquatic invertebrates<br>(acute and chronic) | Algae                      | Higher plant       | Sed. Dwelling<br>organisms<br>prolonged |
|--------------------------------|-------------------------|----------------------------|----------------------------------------------|----------------------------|--------------------|-----------------------------------------|
|                                | <i>Geomean approach</i> | <i>Pimephales promelas</i> | <i>Natural populations in<br/>ponds</i>      | <i>Anabaena flos-aquae</i> | <i>Lemna gibba</i> | <i>Chironomus riparius</i>              |
| Level of assessment            | Tier 2                  | Tier 1                     | Tier 3                                       | Tier 1                     | Tier 1             | Tier 1                                  |
| <b>RAC</b>                     | 0.0146 µg/L             | 0.003 µg/L                 | 0.002 µg/L <sup>1</sup>                      | ≥ 2.70 µg/L                | 0.139 µg/L         | 4.5 µg/kg dry<br>sediment               |
| <b>FOCUS Step 1 PEC values</b> | <b>0.201</b>            | <b>0.201</b>               | <b>0.201</b>                                 | 0.201                      | <b>0.201</b>       | <b>49.869</b>                           |
| <b>FOCUS Step 2 PEC values</b> |                         |                            |                                              |                            |                    |                                         |
| North Europe                   | <b>0.184</b>            | <b>0.184</b>               | <b>0.184</b>                                 | 0.184                      | <b>0.184</b>       | <b>14987</b>                            |
| South Europe                   | <b>0.184</b>            | <b>0.184</b>               | <b>0.184</b>                                 | 0.184                      | <b>0.184</b>       | <b>8.108</b>                            |
| <b>FOCUS Step 3 PEC values</b> |                         |                            |                                              |                            |                    |                                         |
| D3 / ditch                     | <b>0.104</b>            | <b>0.104</b>               | <b>0.104</b>                                 | -                          | 0.104              | 0.511                                   |
| D4 / pond                      | 0.004                   | <b>0.004</b>               | <b>0.004</b>                                 | -                          | 0.004              | 0.063                                   |
| D4 / stream                    | <b>0.081</b>            | <b>0.081</b>               | <b>0.081</b>                                 | -                          | 0.081              | 0.096                                   |
| D6 / ditch                     | <b>0.103</b>            | <b>0.103</b>               | <b>0.103</b>                                 | -                          | 0.103              | 0.400                                   |
| R1 / pond                      | 0.004                   | <b>0.004</b>               | <b>0.004</b>                                 | -                          | 0.004              | 0.121                                   |
| R1 / stream                    | <b>0.069</b>            | <b>0.069</b>               | <b>0.069</b>                                 | -                          | 0.069              | 2.430                                   |
| R2 / stream                    | <b>0.092</b>            | <b>0.092</b>               | <b>0.092</b>                                 | -                          | 0.092              | <b>5.326</b>                            |
| R3 / stream                    | <b>0.097</b>            | <b>0.097</b>               | <b>0.097</b>                                 | -                          | 0.097              | 2.552                                   |
| R4 / stream                    | <b>0.069</b>            | <b>0.069</b>               | <b>0.069</b>                                 | -                          | 0.069              | 2.335                                   |

Note: PEC values in bold indicate that the PEC<sub>SW/SED</sub> exceeds the RAC, and thus that further consideration is necessary; <sup>1</sup>ETO-RAC (ecological threshold option)

**FOCUS<sub>sw</sub> step 4 – Comparison of RACs and global maximum PEC<sub>sw</sub> for alpha-cypermethrin – Leafy vegetables (lettuce and leafy cabbage) at 1 x 20 g a.s./ha**

| Scenario                       |        | fish acute              |        |               |              | fish chronic               |              |               |              | Aquatic invertebrates (acute and chronic) |              |               |  |
|--------------------------------|--------|-------------------------|--------|---------------|--------------|----------------------------|--------------|---------------|--------------|-------------------------------------------|--------------|---------------|--|
|                                |        | <i>Geomean approach</i> |        |               |              | <i>Pimephales promelas</i> |              |               |              | <i>Natural populations in ponds</i>       |              |               |  |
| Level of assessment            |        | Tier 2                  |        |               |              | Tier 1                     |              |               |              | Tier 3                                    |              |               |  |
| RAC                            |        | 0.0146 µg/L             |        |               |              | 0.003 µg/L                 |              |               |              | 0.002 µg/L <sup>1</sup>                   |              |               |  |
| Mitigation options             | 75% N  | 95% N                   | 5 m D  | 5 m D + 50% N | 75% N        | 95% N                      | 5 m D        | 5 m D + 50% N | 75% N        | 95% N                                     | 5 m D        | 5 m D + 50% N |  |
| <b>FOCUS Step 4 PEC values</b> |        |                         |        |               |              |                            |              |               |              |                                           |              |               |  |
| D3 / ditch                     | 0.005  | <b>0.028</b>            | 0.007  | 0.008         | <b>0.005</b> | <b>0.028</b>               | <b>0.007</b> | <b>0.008</b>  | <b>0.005</b> | <b>0.028</b>                              | <b>0.007</b> | <b>0.008</b>  |  |
| D4 / pond                      | <0.001 | 0.003                   | <0.001 | 0.001         | <0.001       | <b>0.003</b>               | <0.001       | 0.001         | <0.001       | <b>0.003</b>                              | <0.001       | 0.001         |  |
| D4 / stream                    | 0.004  | <b>0.030</b>            | 0.007  | 0.008         | <b>0.004</b> | <b>0.030</b>               | <b>0.007</b> | <b>0.008</b>  | <b>0.004</b> | <b>0.030</b>                              | <b>0.007</b> | <b>0.008</b>  |  |
| D6 / ditch                     | 0.005  | <b>0.028</b>            | 0.007  | 0.007         | <b>0.005</b> | <b>0.028</b>               | <b>0.007</b> | <b>0.007</b>  | <b>0.005</b> | <b>0.028</b>                              | <b>0.007</b> | <b>0.007</b>  |  |
| R1 / pond                      | <0.001 | 0.003                   | <0.001 | 0.001         | <0.001       | <b>0.003</b>               | <0.001       | 0.001         | <0.001       | <b>0.003</b>                              | <0.001       | 0.001         |  |
| R1 / stream                    | 0.003  | <b>0.025</b>            | 0.006  | 0.007         | 0.003        | <b>0.025</b>               | <b>0.006</b> | <b>0.007</b>  | <b>0.003</b> | <b>0.025</b>                              | <b>0.006</b> | <b>0.007</b>  |  |
| R2 / stream                    | 0.005  | <b>0.033</b>            | 0.008  | 0.009         | <b>0.005</b> | <b>0.033</b>               | <b>0.008</b> | <b>0.009</b>  | <b>0.005</b> | <b>0.033</b>                              | <b>0.008</b> | <b>0.009</b>  |  |
| R3 / stream                    | 0.005  | <b>0.035</b>            | 0.009  | 0.009         | <b>0.005</b> | <b>0.035</b>               | <b>0.009</b> | <b>0.009</b>  | <b>0.005</b> | <b>0.035</b>                              | <b>0.009</b> | <b>0.009</b>  |  |
| R4 / stream                    | 0.003  | <b>0.025</b>            | 0.006  | 0.007         | 0.003        | <b>0.025</b>               | <b>0.006</b> | <b>0.007</b>  | <b>0.003</b> | <b>0.025</b>                              | <b>0.006</b> | <b>0.007</b>  |  |

Notes: D = Drift mitigation by no-spray buffer zones; N = Drift mitigation by drift reducing nozzles; values in bold exceed the relevant RAC, indicating an unacceptable risk;  
<sup>1</sup>ETO-RAC (ecological threshold option)

**FOCUS<sub>sw</sub> step 2 – Comparison of RACs and worst-case PEC<sub>SW/SED</sub> for alpha-cypermethrin – Fruiting vegetables (cucumber and courgette) at 1 x 30 g a.s./ha (permanent glasshouse use)**

| Scenario                       | fish acute              | fish chronic               | Aquatic invertebrates (acute and chronic) | Algae                      | Higher plant       | Sed. Dwelling organisms prolonged |
|--------------------------------|-------------------------|----------------------------|-------------------------------------------|----------------------------|--------------------|-----------------------------------|
|                                | <i>Geomean approach</i> | <i>Pimephales promelas</i> | <i>Natural populations in ponds</i>       | <i>Anabaena flos-aquae</i> | <i>Lemna gibba</i> | <i>Chironomus riparius</i>        |
| Level of assessment            | Tier 2                  | Tier 2                     | Tier 3                                    | Tier 1                     | Tier 1             | Tier 1                            |
| RAC                            | 0.0146 µg/L             | 0.030 µg/L                 | 0.002 µg/L <sup>1</sup>                   | ≥ 2.70 µg/L                | 0.139 µg/L         | 4.5 µg/kg dry sediment            |
| <b>FOCUS Step 2 PEC values</b> |                         |                            |                                           |                            |                    |                                   |
| Europe – drift only            | 0.010                   | 0.010                      | <b>0.010</b>                              | 0.010                      | 0.010              | 0.067                             |

Note: PEC values in bold indicate that the PEC<sub>SW/SED</sub> exceeds the RAC, and thus that further consideration is necessary; <sup>1</sup>ETO-RAC (ecological threshold option)

**FOCUS<sub>sw</sub> step 1 – Comparison of RACs and global maximum PEC<sub>SW/SED</sub> for the metabolite DCVA – All proposed outdoor uses in cereals and oilseed rape (at 1-2 x 10 g a.s./ha), leafy vegetables (at 1-2 x 10 g a.s./ha and 1 x 20 g a.s./ha) and the proposed permanent glasshouse use in fruiting vegetables**

| Scenario                          | fish acute                 | Aquatic invertebrates (acute and chronic) | Algae                                  |
|-----------------------------------|----------------------------|-------------------------------------------|----------------------------------------|
|                                   | <i>Lepomis macrochirus</i> | <i>Daphnia magna</i>                      | <i>Pseudokirchneriella subcapitata</i> |
| Level of assessment               | Tier 1                     | Tier 1                                    | Tier 1                                 |
| RAC                               | 1028 µg/L                  | 619 µg/L                                  | 7000 µg/L                              |
| <b>FOCUS Step 1 PEC values</b>    |                            |                                           |                                        |
| Europe – outdoor uses             | 2.591                      | 2.591                                     | 2.591                                  |
| Europe –permanent glasshouse uses | 0.003                      | 0.003                                     | 0.003                                  |

Note: PEC values in bold indicate that the PEC<sub>SW/SED</sub> exceeds the RAC, and thus that further consideration is necessary

**FOCUS<sub>sw</sub> step 1 – Comparison of RACs and global maximum PEC<sub>SW/SED</sub> for the metabolite 3-PBA – All proposed outdoor uses in cereals and oilseed rape (at 1-2 x 10 g a.s./ha), leafy vegetables (at 1-2 x 10 g a.s./ha and 1 x 20 g a.s./ha) and the proposed permanent glasshouse use in fruiting vegetables**

| Scenario                           | fish acute                 | Aquatic invertebrates (acute and chronic) | Algae                                  | Higher Plant                    |
|------------------------------------|----------------------------|-------------------------------------------|----------------------------------------|---------------------------------|
|                                    | <i>Lepomis macrochirus</i> | <i>Daphnia magna</i>                      | <i>Pseudokirchneriella subcapitata</i> | <i>Myriophyllum elatinoides</i> |
| <b>Level of assessment</b>         | Tier 1                     | Tier 1                                    | Tier 1                                 | Tier 1                          |
| <b>RAC</b>                         | 1032 µg/L                  | 390 µg/L                                  | 8500 µg/L                              | 328 µg a.s./L                   |
| <b>FOCUS Step 1 PEC values</b>     |                            |                                           |                                        |                                 |
| Europe – outdoor uses              | 1.627                      | 1.627                                     | 1.627                                  | 1.627                           |
| Europe – permanent glasshouse uses | 0.001                      | 0.001                                     | 0.001                                  | 0.001                           |

Note: PEC values in bold indicate that the  $PEC_{SW/SED}$  exceeds the RAC, and thus that further consideration is necessary

**Effects on bees (Regulation (EU) N° 283/2013, Annex Part A, point 8.3.1 and Regulation (EU) N° 284/2013 Annex Part A, point 10.3.1)\***

\* This section does reflect the new EFSA Guidance Document on bees which has not yet been noted by the Standing Committee on Plants, Animals, Food and Feed.

| Species                                   | Test substance     | Time scale/type of endpoint                | End point                            | toxicity                                     |
|-------------------------------------------|--------------------|--------------------------------------------|--------------------------------------|----------------------------------------------|
| Honeybee<br>( <i>Apis mellifera</i> )     | Alpha-cypermethrin | Acute, adult toxicity                      | Oral toxicity (LD <sub>50</sub> )    | 0.059 µg a.s./bee <sup>1</sup>               |
| Honeybee<br>( <i>Apis mellifera</i> )     | Alpha-cypermethrin | Acute, adult toxicity                      | Contact toxicity (LD <sub>50</sub> ) | 0.033 µg a.s./bee <sup>1</sup>               |
| Honeybee<br>( <i>Apis mellifera</i> )     | Alpha-cypermethrin | Acute, adult toxicity                      | Oral toxicity (LD <sub>50</sub> )    | 0.246 µg a.s./bee                            |
| Honeybee<br>( <i>Apis mellifera</i> )     | Alpha-cypermethrin | Acute, adult toxicity                      | Contact toxicity (LD <sub>50</sub> ) | 0.030 µg a.s./bee                            |
| Honeybee<br>( <i>Apis mellifera</i> )     | BAS 310 51 I       | Acute, adult toxicity                      | Oral toxicity (LD <sub>50</sub> )    | 2.99 µg prep./bee<br>(0.15 µg a.s./bee)      |
| Honeybee<br>( <i>Apis mellifera</i> )     | BAS 310 51 I       | Acute, adult toxicity                      | Contact toxicity (LD <sub>50</sub> ) | 1.68 µg prep./bee<br>(0.08 µg a.s./bee)      |
| Honeybee<br>( <i>Apis mellifera</i> )     | BAS 310 55 I       | Acute, adult toxicity                      | Oral toxicity (LD <sub>50</sub> )    | 3.26 µg prep./bee<br>(0.17 µg a.s./bee)      |
| Honeybee<br>( <i>Apis mellifera</i> )     | BAS 310 55 I       | Acute, adult toxicity                      | Contact toxicity (LD <sub>50</sub> ) | 1.58 µg prep./bee<br>(0.08 µg a.s./bee)      |
| Honeybee<br>( <i>Apis mellifera</i> )     | BAS 310 51 I       | Acute, adult toxicity                      | Oral toxicity (LD <sub>50</sub> )    | 0.359 µg prep./bee<br>(0.018 µg a.s./bee)    |
| Honeybee<br>( <i>Apis mellifera</i> )     | BAS 310 51 I       | Acute, adult toxicity                      | Contact toxicity (LD <sub>50</sub> ) | 0.319 µg prep./bee<br>(0.016 µg a.s./bee)    |
| Honeybee<br>( <i>Apis mellifera</i> )     | Alpha-cypermethrin | Chronic (10d), adult toxicity              | LDD <sub>50</sub>                    | 0.11 µg a.s./bee/day                         |
| Honeybee<br>( <i>Apis mellifera</i> )     | Alpha-cypermethrin | Chronic (7d), larval toxicity <sup>2</sup> | NOED                                 | ≥ 0.008 µg a.s./larva                        |
| Bumblebee<br>( <i>Bombus terrestris</i> ) | Alpha-cypermethrin | Acute, adult toxicity                      | Oral toxicity (LD <sub>50</sub> )    | 0.54 µg a.s./bee                             |
| Bumblebee<br>( <i>Bombus terrestris</i> ) | Alpha-cypermethrin | Acute, adult toxicity                      | Contact toxicity (LD <sub>50</sub> ) | 0.29 µg a.s./bee                             |
| Bumblebee<br>( <i>Bombus terrestris</i> ) | BAS 310 55 I       | Acute, adult toxicity                      | Oral toxicity (LD <sub>50</sub> )    | > 26.4 µg prep./bee<br>(> 1.325 µg a.s./bee) |
| Bumblebee<br>( <i>Bombus terrestris</i> ) | BAS 310 55 I       | Acute, adult toxicity                      | Contact toxicity (LD <sub>50</sub> ) | > 17.9 µg prep./bee<br>(> 0.9 µg a.s./bee)   |

<sup>1)</sup> study not fully in line with the currently accepted test guidelines

Potential for accumulative toxicity: *not assessed*.

**Semi-field test (Cage and tunnel test)**

In total, three cage studies and five tunnel tests are available, in which the representative formulation BAS 310 55 I or the minor change formulation BAS 310 51 I were applied at a rate of 15 and 30 g a.s./ha, either during



| or after bee flight. All available studies showed consistent results, which are summarized below. |                |                                                                  |                                                                                                                                                                                                                                                                                                                                                                                                                                                                                                                                        |
|---------------------------------------------------------------------------------------------------|----------------|------------------------------------------------------------------|----------------------------------------------------------------------------------------------------------------------------------------------------------------------------------------------------------------------------------------------------------------------------------------------------------------------------------------------------------------------------------------------------------------------------------------------------------------------------------------------------------------------------------------|
| Species                                                                                           | Test substance | Type of test                                                     | Results                                                                                                                                                                                                                                                                                                                                                                                                                                                                                                                                |
| Honeybee<br>( <i>Apis mellifera</i> )                                                             | BAS 310 55 I   | Tunnel test in<br><i>Phacelia<br/>tanacetifolia</i>              | Clear but short-lasting effects on adult bee mortality and flight density after application during bee flight at 0.3 and 0.6 L product/ha (equivalent to 15 and 30 g a.s./ha). No notable effects on mortality of pupae. No notable effects on brood and colony.                                                                                                                                                                                                                                                                       |
| Honeybee<br>( <i>Apis mellifera</i> )                                                             | BAS 310 55 I   | Tunnel test in<br><i>Phacelia<br/>tanacetifolia</i>              | Only limited, non-statistically significant and temporary effects on mortality and flight density after application after bee flight at 0.6 L product/ha (30 g a.s./ha). Moderate statistically significant effects on mortality and foraging activity, which were also temporary, following application during bee flight at 0.3 L product/ha (15 g a.s./ha). No notable effects on brood and colony.                                                                                                                                 |
| Honeybee<br>( <i>Apis mellifera</i> )                                                             | BAS 310 51 I   | Tunnel test in<br><i>Phacelia<br/>tanacetifolia</i> <sup>3</sup> | Clear but temporary effects on adult bee mortality, flight density and behaviour after application during bee flight at 0.6 L product/ha (equivalent to 30 g a.s./ha). No notable effects on mortality of pupae. No notable effects on brood and colony.                                                                                                                                                                                                                                                                               |
| Honeybee<br>( <i>Apis mellifera</i> )                                                             | BAS 310 51 I   | Cage test in<br><i>Phacelia<br/>tanacetifolia</i>                | Temporary, short lasting and slight effects on mortality, flight density and behaviour after application during bee flight at 0.6 L product/ha (30 g a.s./ha). No conclusion can be drawn from the brood data. No notable effects on the colony.                                                                                                                                                                                                                                                                                       |
| Honeybee<br>( <i>Apis mellifera</i> )                                                             | BAS 310 51 I   | Cage test in<br><i>Phacelia<br/>tanacetifolia</i>                | Clear but temporary effects on mortality and flight density after application during bee flight at 0.6 L product/ha (30 g a.s./ha). No notable effects on brood and colony.                                                                                                                                                                                                                                                                                                                                                            |
| Honeybee<br>( <i>Apis mellifera</i> )                                                             | BAS 310 51 I   | Cage test in<br><i>Phacelia<br/>tanacetifolia</i>                | Slight and temporary effects on mortality and flight density after application during bee flight at 0.6 L product/ha (30 g a.s./ha). No notable effects on brood and colony.<br><br>No unacceptable effects on mortality and flight density following application after bee flight at 0.6 L product/ha (30 g a.s./ha). No unacceptable effects on brood and colony.                                                                                                                                                                    |
| Honeybee<br>( <i>Apis mellifera</i> )                                                             | BAS 3101 55 I  | Tunnel test in<br><i>Phacelia<br/>tanacetifolia</i>              | Clear but temporary effects on mortality, flight density and behaviour after application during bee flight at 0.6 L product/ha (30 g a.s./ha). Slight and temporary effects on mortality and flight density after application after bee flight at 0.6 L product/ha (30 g a.s./ha).<br><br>In the absence of a pollen source in the crop the amount of pollen in the combs decreased during the test period, thereby reducing the bee brood. Taking this into consideration, no unacceptable effects on brood and colony were observed. |

| Honeybee<br>( <i>Apis mellifera</i> )                                                                                                                                                                                                                                                                                                                                                                                                                                                                                                                                                                                                                         | BAS 3101 55 I  | Tunnel test in<br><i>Phacelia<br/>tanacetifolia</i> | Clear but temporary effects on mortality and flight density after application during bee flight at 0.6 L product/ha (30 g a.s./ha). No unacceptable effects on brood and colony.<br><br>No significant effects following application after bee flight at 0.6 L product/ha (30 g a.s./ha). No notable effects on brood and colony.                                                                                                                                                                                    |
|---------------------------------------------------------------------------------------------------------------------------------------------------------------------------------------------------------------------------------------------------------------------------------------------------------------------------------------------------------------------------------------------------------------------------------------------------------------------------------------------------------------------------------------------------------------------------------------------------------------------------------------------------------------|----------------|-----------------------------------------------------|----------------------------------------------------------------------------------------------------------------------------------------------------------------------------------------------------------------------------------------------------------------------------------------------------------------------------------------------------------------------------------------------------------------------------------------------------------------------------------------------------------------------|
| <p><b>Field tests</b></p> <p>In total, five field effect studies are available, in which the representative formulation BAS 310 55 I or the minor change formulation BAS 310 51 I were applied at a rate of 15 and 30 g a.s./ha, either during or after bee flight. All available studies showed consistent results, which are summarized below.</p> <p>In addition, five field exposure studies are available, in which residues of alpha-cypermethrin in pollen, nectar and/or flowers were measured. Note that some of the field exposure studies were done at the same time, and were reported in the same study report, as the field effect studies.</p> |                |                                                     |                                                                                                                                                                                                                                                                                                                                                                                                                                                                                                                      |
| Species                                                                                                                                                                                                                                                                                                                                                                                                                                                                                                                                                                                                                                                       | Test substance | Type of test                                        | Results                                                                                                                                                                                                                                                                                                                                                                                                                                                                                                              |
| Honeybee<br>( <i>Apis mellifera</i> )                                                                                                                                                                                                                                                                                                                                                                                                                                                                                                                                                                                                                         | BAS 310 55 I   | Field test in<br><i>Phacelia<br/>tanacetifolia</i>  | Clear but temporary effects on mortality and flight density after application during bee flight at 0.3 L product/ha (15 g a.s./ha). No notable effects on brood and colony observed, but the results for the colony strength assessment were considered unreliable.<br><br>Slight and temporary effects on mortality following application after bee flight at 0.6 L (30 g a.s./ha). No notable effects on brood and colony observed, but the results for the colony strength assessment were considered unreliable. |
| Honeybee<br>( <i>Apis mellifera</i> )                                                                                                                                                                                                                                                                                                                                                                                                                                                                                                                                                                                                                         | BAS 310 51 I   | Field test in<br><i>Phacelia<br/>tanacetifolia</i>  | No significant effects after application after bee flight at 0.6 L product/ha (30 g a.s./ha). No notable effects on brood and colony.<br><br>Clear but temporary effects on bee mortality, flight density and behaviour after application during bee flight at 0.6 L product/ha (30 g a.s./ha). The size of the colonies did not increase, while the control did. The results from this study can therefore not be considered to exclude effects on colony strength.                                                 |
| Honeybee<br>( <i>Apis mellifera</i> )                                                                                                                                                                                                                                                                                                                                                                                                                                                                                                                                                                                                                         | BAS 310 51 I   | Field test in<br><i>Phacelia<br/>tanacetifolia</i>  | Clear but temporary effects on flight density and behaviour after application during bee flight at 0.6 L product/ha (30 g a.s./ha). No significant effects on bee mortality. No notable effects on brood and colony.                                                                                                                                                                                                                                                                                                 |
| Honeybee<br>( <i>Apis mellifera</i> )                                                                                                                                                                                                                                                                                                                                                                                                                                                                                                                                                                                                                         | BAS 310 55 I   | Field test in<br><i>Phacelia<br/>tanacetifolia</i>  | Clear but temporary effects on mortality, flight density and behaviour after application during bee flight at 0.6 L product/ha (30 g a.s./ha). No notable effects on brood and colony.                                                                                                                                                                                                                                                                                                                               |
| Honeybee<br>( <i>Apis mellifera</i> )                                                                                                                                                                                                                                                                                                                                                                                                                                                                                                                                                                                                                         | BAS 310 55 I   | Field test in<br><i>Phacelia<br/>tanacetifolia</i>  | Clear but temporary effects on mortality and behaviour after application during bee flight at 0.6 L product/ha (30 g a.s./ha). No significant effects on foraging activity. No notable effects on brood and colony observed, but the results for the colony strength assessment were                                                                                                                                                                                                                                 |

|                                    |                                                                 |                                                                                               |                                                                                                                                                                                                                                                                                                                                                                                                                             |
|------------------------------------|-----------------------------------------------------------------|-----------------------------------------------------------------------------------------------|-----------------------------------------------------------------------------------------------------------------------------------------------------------------------------------------------------------------------------------------------------------------------------------------------------------------------------------------------------------------------------------------------------------------------------|
|                                    |                                                                 |                                                                                               | considered unreliable.<br>After application of 2 x 0.3 L/ha (2 x 15 g a.s./ha): moderate effects on mortality and foraging activity after the 1 <sup>st</sup> application, no unacceptable effects on mortality and foraging activity after the 2 <sup>nd</sup> application. No notable effects on brood and colony observed, but the results for the colony strength assessment were considered unreliable.                |
| Honeybee ( <i>Apis mellifera</i> ) | Several alpha-cypermethrin containing formulations <sup>1</sup> | Residue analysis in honey/nectar and pollen from treated <i>Phacelia tanacetifolia</i> fields | Residues derived from in-hive samples (7 DAA and 14 DAA) from honeybee effect studies :<br>Treated pollen showed residues of alpha-cypermethrin ranging from 0.003 to 0.012 mg/kg 7 DAA, and from < 0.003 to 0.026 mg/kg 14 DAA, depending on the study site.<br>No alpha-cypermethrin was detected (LOD 0.003 mg/kg) in any honey/nectar specimens of the aforementioned field trials.                                     |
| Honeybee ( <i>Apis mellifera</i> ) | BAS 310 55 I                                                    | Residue analysis in honey/nectar and pollen from treated <i>Phacelia tanacetifolia</i> fields | Residues derived through bee sampling (1DAA) and from in-hive samples (7DAA) from honeybee field effect study:<br>Treated pollen showed residues of alpha-cypermethrin ranging from 0.06 to 0.38 mg/kg at 1DAA (bee sampling) and from <LOQ to 0.03 mg/kg at 7DAA (in-hive sampling).<br>No measurable alpha-cypermethrin residues (LOQ = 0.01 mg/kg) were detected in any of the honey/nectar specimens at 1 DAA and 7DAA. |
| Honeybee ( <i>Apis mellifera</i> ) | BAS 310 55 I                                                    | Residue analysis in honey/nectar and pollen from treated <i>Phacelia tanacetifolia</i> fields | Residues derived from in-hive samples (7DAA and 14DAA) from honeybee effect study:<br>Treated pollen showed residues of alpha-cypermethrin ranging from <LOQ to 0.03 mg/kg at 7DAA, and <LOQ at 14 DAA.<br>No measurable alpha-cypermethrin residues (LOQ = 0.01 mg/kg) were detected in any of the honey/nectar specimens at 7DAA and 14 DAA.                                                                              |
| Honeybee ( <i>Apis mellifera</i> ) | BAS 310 55 I                                                    | Residue analysis in flowers, nectar and pollen from treated oilseed rape                      | Applied rate: 30 g alpha-cypermethrin/ha; highest residues were found in pollen (hand sampling) with 90 <sup>th</sup> percentile 9.37 mg a.s./kg and an average of 6.52 mg a.s./kg                                                                                                                                                                                                                                          |
| Honeybee ( <i>Apis mellifera</i> ) | BAS 310 55 I                                                    | Residue analysis in flowers, nectar and pollen from treated oilseed rape                      | Applied rate: 30 g alpha-cypermethrin /ha; highest residues were found in pollen. For pollen obtained through hand sampling: 90 <sup>th</sup> percentile 9.088 mg a.s./kg and an average of 7.90 mg a.s./kg. For pollen obtained through bee sampling: 90 <sup>th</sup> percentile 0.978 mg a.s./kg and an average of 0.632 mg a.s./kg                                                                                      |

<sup>1</sup> BAS 310 40 I (100 g/L EC formulation), BAS 310 06 I (50 g/L EC formulation), BAS 310 08 I (15% WG formulation) and BAS 310 41 I (100 g/L SC formulation)

<sup>2</sup> Bee larvae were fed contaminated food for 4 days (day 3 to 6), in line with the OECD Test Guideline 239 (honeybee larval toxicity, repeated exposure). The EFSA Guidance Document for bees (2013) however recommends a 5 day feeding/exposure period.

<sup>3</sup> Because of a relatively high mortality in the control, and a higher pre-treatment mortality in the reference item treatment compared to the control, the reliability of the results from this study could be questioned. Therefore, this study is only considered as supportive information.

### Tier 1 Risk assessment according to SANCO/10329/2002 and EPPO (2010)

Risk assessment for Cereals at 1-2 x 10 g a.s./ha and oilseed rape at 1-2 x 10 g a.s./ha

| Species                            | Test substance     | Risk quotient            | HQ             | Trigger |
|------------------------------------|--------------------|--------------------------|----------------|---------|
| Honeybee ( <i>Apis mellifera</i> ) | Alpha-cypermethrin | HQ <sub>oral</sub>       | <b>169</b>     | 50      |
| Honeybee ( <i>Apis mellifera</i> ) | Alpha-cypermethrin | HQ <sub>contact</sub>    | <b>333</b>     | 50      |
| Honeybee ( <i>Apis mellifera</i> ) | BAS 310 55 I       | HQ <sub>oral</sub>       | <b>552</b>     | 50      |
| Honeybee ( <i>Apis mellifera</i> ) | BAS 310 55 I       | HQ <sub>contact</sub>    | <b>612</b>     | 50      |
| Honeybee ( <i>Apis mellifera</i> ) | Alpha-cypermethrin | TER <sub>CH,adult</sub>  | < <b>0.354</b> | 1       |
| Honeybee ( <i>Apis mellifera</i> ) | Alpha-cypermethrin | TER <sub>CH,larvae</sub> | ≥ <b>0.409</b> | 1       |

Note: HQ and TER values in bold exceed, respectively are below, the trigger, indicating that further consideration is required.

Risk assessment for Lettuce and leafy cabbage at 1-2 x 10 g a.s./ha or 1 x 20 g a.s./ha

| Species                            | Test substance     | Risk quotient            | HQ             | Trigger |
|------------------------------------|--------------------|--------------------------|----------------|---------|
| Honeybee ( <i>Apis mellifera</i> ) | Alpha-cypermethrin | HQ <sub>oral</sub>       | <b>339</b>     | 50      |
| Honeybee ( <i>Apis mellifera</i> ) | Alpha-cypermethrin | HQ <sub>contact</sub>    | <b>667</b>     | 50      |
| Honeybee ( <i>Apis mellifera</i> ) | BAS 310 55 I       | HQ <sub>oral</sub>       | <b>1104</b>    | 50      |
| Honeybee ( <i>Apis mellifera</i> ) | BAS 310 55 I       | HQ <sub>contact</sub>    | <b>1243</b>    | 50      |
| Honeybee ( <i>Apis mellifera</i> ) | Alpha-cypermethrin | TER <sub>CH,adult</sub>  | < <b>0.354</b> | 1       |
| Honeybee ( <i>Apis mellifera</i> ) | Alpha-cypermethrin | TER <sub>CH,larvae</sub> | ≥ <b>0.409</b> | 1       |

Note: HQ and TER values in bold exceed, respectively are below, the trigger, indicating that further consideration is required.

Risk assessment for Cucumber and courgette at 1-2 x 15 g a.s./ha or 1 x 30 g a.s./ha (indoor use – restricted to permanent greenhouses)

No risk assessment required as no exposure to bees is expected from the use in permanent greenhouses.

### Tier 1 Risk assessment according to EFSA (2013)

Risk assessment for Cereals at 1-2 x 10 g a.s./ha, oilseed rape at 1-2 x 10 g a.s./ha, and lettuce and leafy cabbage at 1-2 x 10 g a.s./ha or 1 x 20 g a.s./ha.

For the use in cucumber and courgette at 1-2 x 15 g a.s./ha or 1 x 30 g a.s./ha, which is restricted to permanent greenhouses, no exposure to bees is expected. Therefore, no risk assessment is required for this use.

#### Acute contact exposure for adult honeybees – screening step

| Test substance     | Crop                           | Application rate (g/ha) | LD <sub>50</sub> (µg/bee) | HQ         | Trigger value |
|--------------------|--------------------------------|-------------------------|---------------------------|------------|---------------|
| Alpha-cypermethrin | Cereals                        | 10                      | 0.030                     | <b>333</b> | 42            |
|                    | Oilseed rape                   | 10                      | 0.030                     | <b>333</b> | 42            |
|                    | Leafy vegetables <sup>1)</sup> | 20                      | 0.030                     | <b>667</b> | 42            |
| BAS 310 55 I       | Cereals                        | 198.2 <sup>2)</sup>     | 0.319                     | <b>621</b> | 42            |
|                    | Oilseed rape                   | 198.2 <sup>2)</sup>     | 0.319                     | <b>621</b> | 42            |

|  |                                |                     |       |             |    |
|--|--------------------------------|---------------------|-------|-------------|----|
|  | Leafy vegetables <sup>1)</sup> | 396.4 <sup>2)</sup> | 0.319 | <b>1243</b> | 42 |
|--|--------------------------------|---------------------|-------|-------------|----|

<sup>1)</sup> the proposed use in lettuce and leafy cabbage <sup>2)</sup> maximum application rate in mL/ha multiplied by the product density of 0.991 g/cm<sup>3</sup>; TER values shown in bold are below the trigger.

### Acute contact exposure of adult honeybees – Tier 1

| Test substance: alpha-cypermethrin |              |      |                                 |                  |                           |             |         |
|------------------------------------|--------------|------|---------------------------------|------------------|---------------------------|-------------|---------|
| Crop                               | Scenario     | BBCH | Appl. Rate (g/ha)               | f <sub>dep</sub> | LD <sub>50</sub> (µg/bee) | HQ          | Trigger |
| Cereals                            | treated crop | ≥ 40 | 10                              | 1                | 0.030                     | <b>333</b>  | 42      |
|                                    | weeds        | ≥ 40 | 10                              | 0.3              |                           | <b>100</b>  |         |
|                                    | field margin | ≥ 40 | 10                              | 0.028            |                           | 9.33        |         |
| Oilseed rape                       | treated crop | ≥ 40 | 10                              | 1                |                           | <b>333</b>  |         |
|                                    | weeds        | ≥ 40 | 10                              | 0.25             |                           | <b>83.3</b> |         |
|                                    | field margin | ≥ 40 | 10                              | 0.028            |                           | 9.33        |         |
| Leafy vegetables <sup>1)</sup>     | weeds        | < 50 | 20                              | 1                |                           | <b>667</b>  |         |
|                                    | field margin | < 50 | 20                              | 0.028            |                           | 18.67       |         |
| Test substance: BAS 310 55 I       |              |      |                                 |                  |                           |             |         |
| Crop                               | Scenario     | BBCH | Appl. Rate (g/ha) <sup>2)</sup> | f <sub>dep</sub> | LD <sub>50</sub> (µg/bee) | HQ          | Trigger |
| Cereals                            | treated crop | ≥ 40 | 198.2                           | 1                | 0.319                     | <b>621</b>  | 42      |
|                                    | weeds        | ≥ 40 | 198.2                           | 0.3              |                           | <b>186</b>  |         |
|                                    | field margin | ≥ 40 | 198.2                           | 0.028            |                           | 17.4        |         |
| Oilseed rape                       | treated crop | ≥ 40 | 198.2                           | 1                |                           | <b>621</b>  |         |
|                                    | weeds        | ≥ 40 | 198.2                           | 0.25             |                           | <b>155</b>  |         |
|                                    | field margin | ≥ 40 | 198.2                           | 0.028            |                           | 17.4        |         |
| Leafy vegetables <sup>1)</sup>     | weeds        | < 50 | 396.4                           | 1                |                           | <b>1243</b> |         |
|                                    | field margin | < 50 | 396.4                           | 0.028            |                           | 34.8        |         |

<sup>1)</sup> the proposed use in lettuce and leafy cabbage; <sup>2)</sup> maximum application rate in mL/ha multiplied by the product density of 0.991 g/cm<sup>3</sup>; TER values shown in bold are below the trigger.

### Acute and chronic oral exposure of adult honeybees and honeybee larvae – screening step

| Type of assessment               | Test substance     | Crop          | Application rate (kg a.s./ha) | SV  | Endpoint                                        | ETR         | Trigger value |
|----------------------------------|--------------------|---------------|-------------------------------|-----|-------------------------------------------------|-------------|---------------|
| Acute oral exposure adult bees   | Alpha-cypermethrin | Cereals       | 0.010                         | 7.6 | 0.059 µg a.s./bee                               | <b>1.29</b> | 0.2           |
|                                  |                    | Oilseed rape  | 0.010                         | 7.6 |                                                 | <b>1.29</b> | 0.2           |
|                                  |                    | Lettuce       | 0.020                         | 7.6 |                                                 | <b>2.58</b> | 0.2           |
|                                  |                    | Leafy cabbage | 0.020                         | 7.6 |                                                 | <b>2.58</b> | 0.2           |
|                                  | BAS 310 55 I       | Cereals       | 0.198 <sup>1)</sup>           | 7.6 | 0.359 µg product/bee                            | <b>4.19</b> | 0.2           |
|                                  |                    | Oilseed rape  | 0.198 <sup>1)</sup>           | 7.6 |                                                 | <b>4.19</b> | 0.2           |
|                                  |                    | Lettuce       | 0.396 <sup>1)</sup>           | 7.6 |                                                 | <b>8.38</b> | 0.2           |
|                                  |                    | Leafy cabbage | 0.396 <sup>1)</sup>           | 7.6 |                                                 | <b>8.38</b> | 0.2           |
| Chronic oral exposure adult bees | Alpha-cypermethrin | Cereals       | 0.010                         | 7.6 | 0.11 µg a.s./bee/day                            | <b>0.69</b> | 0.03          |
|                                  |                    | Oilseed rape  | 0.010                         | 7.6 |                                                 | <b>0.69</b> | 0.03          |
|                                  |                    | Lettuce       | 0.020                         | 7.6 |                                                 | <b>1.38</b> | 0.03          |
|                                  |                    | Leafy cabbage | 0.020                         | 7.6 |                                                 | <b>1.38</b> | 0.03          |
| Chronic oral exposure larvae     | Alpha-cypermethrin | Cereals       | 0.010                         | 4.4 | ≥ 0.008 µg a.s./larvae per developmental period | <b>5.5</b>  | 0.2           |
|                                  |                    | Oilseed rape  | 0.010                         | 4.4 |                                                 | <b>5.5</b>  | 0.2           |
|                                  |                    | Lettuce       | 0.020                         | 4.4 |                                                 | <b>11.0</b> | 0.2           |
|                                  |                    | Leafy cabbage | 0.020                         | 4.4 |                                                 | <b>11.0</b> | 0.2           |

<sup>1)</sup> maximum application rate in L/ha multiplied by the product density of 0.991 g/cm<sup>3</sup>; SV: Shortcut value; **bold** values exceed the trigger, indicating a potential risk.

#### Acute oral exposure of adult honeybees – Tier 1 (ETR values calculated based on toxicity data for the active substance alpha-cypermethrin)

| Crop                    | Scenario        | BBCH  | Appl. rate (kg a.s./ha) | E <sub>f</sub> | SV   | Endpoint (µg a.s./bee) | ETR         | Trigger value |
|-------------------------|-----------------|-------|-------------------------|----------------|------|------------------------|-------------|---------------|
| Cereals                 | Treated crop    | 40-69 | 0.01                    | 1              | 0.92 | 0.059                  | 0.16        | 0.2           |
|                         |                 | ≥ 70  |                         | 1              | 0    |                        | 0           |               |
|                         | Weeds           | 40-69 |                         | 0.3            | 3.7  |                        | 0.19        |               |
|                         |                 | ≥ 70  |                         | 0.3            | 3.7  |                        | 0.19        |               |
|                         | Field margin    | 40-69 |                         | 0.0092         | 3.7  |                        | 0.006       |               |
|                         |                 | ≥ 70  |                         | 0.0092         | 3.7  |                        | 0.006       |               |
|                         | Adjacent crop   | 40-69 |                         | 0.0033         | 7.6  |                        | 0.004       |               |
|                         |                 | ≥ 70  |                         | 0.0033         | 7.6  |                        | 0.004       |               |
| Succeeding crop         | 40-69           | 1     | 0.7                     | 0.12           |      |                        |             |               |
|                         | ≥ 70            | 1     | 0.7                     | 0.12           |      |                        |             |               |
| Oilseed rape            | Treated crop    | 40-69 | 0.01                    | 1              | 7.6  | 0.059                  | <b>1.29</b> | 0.2           |
|                         | Weeds           | 40-69 |                         | 0.25           | 3.7  |                        | 0.16        |               |
|                         | Field margin    | 40-69 |                         | 0.0092         | 3.7  |                        | 0.006       |               |
|                         | Adjacent crop   | 40-69 |                         | 0.0033         | 7.6  |                        | 0.004       |               |
|                         | Succeeding crop | 40-69 |                         | 1              | 0.7  |                        | 0.12        |               |
| Lettuce / Leafy cabbage | Treated crop    | 10-49 | 0.02                    | 1              | 0    | 0.059                  | 0           | 0.2           |
|                         | Weeds           | 10-49 |                         | 1              | 3.7  |                        | <b>1.25</b> |               |
|                         | Field margin    | 10-49 |                         | 0.0092         | 3.7  |                        | 0.012       |               |
|                         | Adjacent crop   | 10-49 |                         | 0.0033         | 7.6  |                        | 0.009       |               |
|                         | Succeeding crop | 10-49 |                         | 1              | 0.7  |                        | <b>0.24</b> |               |

SV: Shortcut value; E<sub>f</sub>: exposure factor; bold values exceed the trigger, indicating a potential risk

#### Acute oral exposure of adult honeybees – Tier 1 (ETR values calculated based on toxicity data for the representative formulation BAS 310 55 I)

| Crop            | Scenario        | BBCH  | Appl. rate (kg a.s./ha) <sup>1)</sup> | E <sub>f</sub> | SV   | Endpoint (µg a.s./bee) | ETR         | Trigger value |
|-----------------|-----------------|-------|---------------------------------------|----------------|------|------------------------|-------------|---------------|
| Cereals         | Treated crop    | 40-69 | 0.198                                 | 1              | 0.92 | 0.359                  | <b>0.51</b> | 0.2           |
|                 |                 | ≥ 70  |                                       | 1              | 0    |                        | 0           |               |
|                 | Weeds           | 40-69 |                                       | 0.3            | 3.7  |                        | <b>0.61</b> |               |
|                 |                 | ≥ 70  |                                       | 0.3            | 3.7  |                        | <b>0.61</b> |               |
|                 | Field margin    | 40-69 |                                       | 0.0092         | 3.7  |                        | 0.019       |               |
|                 |                 | ≥ 70  |                                       | 0.0092         | 3.7  |                        | 0.019       |               |
|                 | Adjacent crop   | 40-69 |                                       | 0.0033         | 7.6  |                        | 0.014       |               |
|                 |                 | ≥ 70  |                                       | 0.0033         | 7.6  |                        | 0.014       |               |
| Succeeding crop | 40-69           | 1     | 0.7                                   | <b>0.39</b>    |      |                        |             |               |
|                 | ≥ 70            | 1     | 0.7                                   | <b>0.39</b>    |      |                        |             |               |
| Oilseed rape    | Treated crop    | 40-69 | 0.198                                 | 1              | 7.6  | 0.359                  | <b>4.19</b> | 0.2           |
|                 | Weeds           | 40-69 |                                       | 0.25           | 3.7  |                        | <b>0.51</b> |               |
|                 | Field margin    | 40-69 |                                       | 0.0092         | 3.7  |                        | 0.018       |               |
|                 | Adjacent crop   | 40-69 |                                       | 0.0033         | 7.6  |                        | 0.014       |               |
|                 | Succeeding crop | 40-69 |                                       | 1              | 0.7  |                        | <b>0.39</b> |               |

|                               |                 |       |       |        |     |       |             |     |
|-------------------------------|-----------------|-------|-------|--------|-----|-------|-------------|-----|
| Lettuce /<br>Leafy<br>cabbage | Treated crop    | 10-49 | 0.396 | 1      | 0   | 0.359 | 0           | 0.2 |
|                               | Weeds           | 10-49 |       | 1      | 3.7 |       | <b>4.08</b> |     |
|                               | Field margin    | 10-49 |       | 0.0092 | 3.7 |       | 0.038       |     |
|                               | Adjacent crop   | 10-49 |       | 0.0033 | 7.6 |       | 0.028       |     |
|                               | Succeeding crop | 10-49 |       | 1      | 0.7 |       | <b>0.77</b> |     |

<sup>1)</sup> maximum application rate in L/ha multiplied by the product density of 0.991 g/cm<sup>3</sup>; SV: Shortcut value; E<sub>f</sub>: exposure factor; bold values exceed the trigger, indicating a potential risk

#### Chronic oral exposure of adult honeybees – Tier 1.

| Crop                          | Scenario        | BBCH  | Appl. rate (kg a.s./ha) | E <sub>f</sub> | SV   | twa  | Endpoint (µg a.s./bee/day) | ETR          | Trigger value |
|-------------------------------|-----------------|-------|-------------------------|----------------|------|------|----------------------------|--------------|---------------|
| cereals                       | Treated crop    | 40-69 | 0.01                    | 1              | 0.92 | 0.72 | 0.11                       | <b>0.060</b> | 0.03          |
|                               |                 | ≥ 70  |                         | 1              | 0    |      |                            | 0            |               |
|                               | Weeds           | 40-69 |                         | 0.3            | 2.9  |      |                            | <b>0.057</b> |               |
|                               |                 | ≥ 70  |                         | 0.3            | 2.9  |      |                            | <b>0.057</b> |               |
|                               | Field margin    | 40-69 |                         | 0.0092         | 2.9  |      |                            | 0.002        |               |
|                               |                 | ≥ 70  |                         | 0.0092         | 2.9  |      |                            | 0.002        |               |
|                               | Adjacent crop   | 40-69 |                         | 0.0033         | 5.8  |      |                            | 0.001        |               |
|                               |                 | ≥ 70  |                         | 0.0033         | 5.8  |      |                            | 0.001        |               |
| Succeeding crop               | 40-69           | 1     | 0.54                    | <b>0.035</b>   |      |      |                            |              |               |
|                               | ≥ 70            | 1     | 0.54                    | <b>0.035</b>   |      |      |                            |              |               |
| oilseed rape                  | Treated crop    | 40-69 | 0.01                    | 1              | 5.8  | 0.72 | 0.11                       | <b>0.38</b>  | 0.03          |
|                               | Weeds           | 40-69 |                         | 0.25           | 2.9  |      |                            | <b>0.047</b> |               |
|                               | Field margin    | 40-69 |                         | 0.0092         | 2.9  |      |                            | 0.002        |               |
|                               | Adjacent crop   | 40-69 |                         | 0.0033         | 5.8  |      |                            | 0.001        |               |
|                               | Succeeding crop | 40-69 |                         | 1              | 0.54 |      |                            | <b>0.035</b> |               |
| Lettuce /<br>Leafy<br>cabbage | Treated crop    | 10-49 | 0.02                    | 1              | 0    | 0.72 | 0.11                       | 0            | 0.03          |
|                               | Weeds           | 10-49 |                         | 1              | 2.9  |      |                            | <b>0.38</b>  |               |
|                               | Field margin    | 10-49 |                         | 0.0092         | 2.9  |      |                            | 0.003        |               |
|                               | Adjacent crop   | 10-49 |                         | 0.0033         | 5.8  |      |                            | 0.003        |               |
|                               | Succeeding crop | 10-49 |                         | 1              | 0.54 |      |                            | <b>0.071</b> |               |

SV: Shortcut value; E<sub>f</sub>: exposure factor; bold values exceed the trigger, indicating a potential risk

#### Chronic oral exposure of honeybee larvae – Tier 1.

| Crop    | Scenario        | BBCH  | Appl. rate (kg a.s./ha) | E <sub>f</sub> | SV   | twa  | Endpoint (µg a.s./larva) | ETR           | Trigger value |
|---------|-----------------|-------|-------------------------|----------------|------|------|--------------------------|---------------|---------------|
| Cereals | Treated crop    | 40-69 | 0.01                    | 1              | 0.15 | 0.85 | ≥ 0.008                  | ≤ 0.16        | 0.2           |
|         |                 | ≥ 70  |                         | 1              | 0    |      |                          | 0             |               |
|         | Weeds           | 40-69 |                         | 0.3            | 2.2  |      |                          | ≤ <b>0.70</b> |               |
|         |                 | ≥ 70  |                         | 0.3            | 2.2  |      |                          | ≤ <b>0.70</b> |               |
|         | Field margin    | 40-69 |                         | 0.0092         | 2.2  |      |                          | ≤ 0.022       |               |
|         |                 | ≥ 70  |                         | 0.0092         | 2.2  |      |                          | ≤ 0.022       |               |
|         | Adjacent crop   | 40-69 |                         | 0.0033         | 4.4  |      |                          | ≤ 0.015       |               |
|         |                 | ≥ 70  |                         | 0.0033         | 4.4  |      |                          | ≤ 0.015       |               |
|         | Succeeding crop | 40-69 |                         | 1              | 0.4  |      |                          | ≤ <b>0.43</b> |               |
|         |                 | ≥ 70  |                         | 1              | 0.4  |      |                          | ≤ <b>0.42</b> |               |

|                         |                 |       |      |        |     |      |              |                    |     |
|-------------------------|-----------------|-------|------|--------|-----|------|--------------|--------------------|-----|
| Oilseed rape            | Treated crop    | 40-69 | 0.01 | 1      | 4.4 | 0.85 | $\geq 0.008$ | $\leq$ <b>4.68</b> | 0.2 |
|                         | Weeds           | 40-69 |      | 0.25   | 2.2 |      |              | $\leq$ <b>0.58</b> |     |
|                         | Field margin    | 40-69 |      | 0.0092 | 2.2 |      |              | $\leq$ 0.022       |     |
|                         | Adjacent crop   | 40-69 |      | 0.0033 | 4.4 |      |              | $\leq$ 0.015       |     |
|                         | Succeeding crop | 40-69 |      | 1      | 0.2 |      |              | $\leq$ <b>0.21</b> |     |
| Lettuce / Leafy cabbage | Treated crop    | 10-49 | 0.02 | 1      | 0   | 0.85 | $\geq 0.008$ | 0                  | 0.2 |
|                         | Weeds           | 10-49 |      | 1      | 2.2 |      |              | $\leq$ <b>4.68</b> |     |
|                         | Field margin    | 10-49 |      | 0.0092 | 2.2 |      |              | $\leq$ 0.043       |     |
|                         | Adjacent crop   | 10-49 |      | 0.0033 | 4.4 |      |              | $\leq$ 0.031       |     |
|                         | Succeeding crop | 10-49 |      | 1      | 0.4 |      |              | $\leq$ <b>0.85</b> |     |

SV: Shortcut value;  $E_f$ : exposure factor; bold values exceed the trigger, indicating a potential risk

#### Exposure to contaminated guttation water

| Type of assessment               | Water consumption ( $\mu\text{L}$ ) | PEC ( $\mu\text{g}/\mu\text{L}$ ) <sup>1</sup> | Endpoint                                                         | ETR          | Trigger |
|----------------------------------|-------------------------------------|------------------------------------------------|------------------------------------------------------------------|--------------|---------|
| Acute oral exposure adult bees   | 11.4                                | 0.000003                                       | 0.059 $\mu\text{g}$ a.s./bee                                     | 0.00058      | 0.2     |
| Chronic oral exposure adult bees | 11.4                                | 0.00000162                                     | 0.11 $\mu\text{g}$ a.s./bee/day                                  | 0.00017      | 0.03    |
| Chronic oral exposure larvae     | 111                                 | 0.00000216                                     | $\geq 0.008$ $\mu\text{g}$ a.s./ larvae per developmental period | $\leq 0.030$ | 0.2     |

<sup>1</sup>based on a maximum water solubility of 3  $\mu\text{g}/\text{L}$  for alpha-cypermethrin; bold values exceed the trigger, indicating a potential risk

#### Exposure to contaminated surface water

| Type of assessment               | Crop              | Water consumption ( $\mu\text{L}$ ) | PEC ( $\mu\text{g}/\mu\text{L}$ ) | Endpoint                                                         | ETR                    | Trigger |
|----------------------------------|-------------------|-------------------------------------|-----------------------------------|------------------------------------------------------------------|------------------------|---------|
| Acute oral exposure adult bees   | All proposed uses | 11.4                                | $0.201 \times 10^{-6}$            | 0.059 $\mu\text{g}$ a.s./bee                                     | $3.884 \times 10^{-5}$ | 0.2     |
| Chronic oral exposure adult bees | All proposed uses | 11.4                                | $0.201 \times 10^{-6}$            | 0.11 $\mu\text{g}$ a.s./bee/day                                  | $2.083 \times 10^{-5}$ | 0.03    |
| Chronic oral exposure larvae     | All proposed uses | 111                                 | $0.201 \times 10^{-6}$            | $\geq 0.008$ $\mu\text{g}$ a.s./ larvae per developmental period | $\leq 0.00279$         | 0.2     |

bold values exceed the trigger, indicating a potential risk

### Effects on other arthropod species (Regulation (EU) N° 283/2013, Annex Part A, point 8.3.2 and Regulation (EU) N° 284/2013 Annex Part A, point 10.3.2)

#### Laboratory tests with standard sensitive species

| Species | Test Substance | End point | Toxicity |
|---------|----------------|-----------|----------|
|         |                |           |          |



| Species                      | Test Substance | End point                                                     | Toxicity                                                                             |
|------------------------------|----------------|---------------------------------------------------------------|--------------------------------------------------------------------------------------|
| <i>Typhlodromus pyri</i>     | BAS 310 51 I   | Mortality, LR <sub>50</sub><br>Reproduction, ER <sub>50</sub> | 0.038 mL prep./ha<br>(1.90 mg a.s./ha)<br>Effects on reproduction were not assessed  |
| <i>Aphidius rhopalosiphi</i> | BAS 310 51 I   | Mortality, LR <sub>50</sub><br>Reproduction, ER <sub>50</sub> | 0.631 mL prep./ha<br>(31.49 mg a.s./ha)<br>Effects on reproduction were not assessed |

**First tier risk assessment** for – Cereals at 1-2 x 10 g a.s./ha, oilseed rape at 1-2 x 10 g a.s./ha, lettuce and leafy cabbage at 1-2 x 10 g a.s./ha or 1 x 20 g a.s./ha.

For the use in cucumber and courgette at 1-2 x 15 g a.s./ha or 1 x 30 g a.s./ha, which is restricted to permanent greenhouses, no exposure to bees is expected. Therefore, no risk assessment is required for this use.

| Test substance | Species                      | Effect (LR <sub>50</sub> g a.s./ha) | HQ in-field | HQ off-field <sup>1</sup> | Trigger |
|----------------|------------------------------|-------------------------------------|-------------|---------------------------|---------|
| BAS 310 55 I   | <i>Typhlodromus pyri</i>     | 0.0019                              | 10526       | 291.6                     | 2       |
| BAS 310 55 I   | <i>Aphidius rhopalosiphi</i> | 0.03149                             | 635         | 17.6                      | 2       |

<sup>1</sup>HQ value calculated for the use in lettuce and leafy cabbage, for which a distance of 1 m was assumed to calculate the drift rate. The off-field exposure for this use covers the off-field exposure for the proposed use in cereals and oilseed rape.

#### Extended laboratory tests, aged residue tests

| Species                  | Life stage | Test substance, substrate                         | Time scale         | Dose (g/ha)                          | End point               | % effect <sup>1</sup>                                                                                                                                                                 | ER <sub>50</sub> |
|--------------------------|------------|---------------------------------------------------|--------------------|--------------------------------------|-------------------------|---------------------------------------------------------------------------------------------------------------------------------------------------------------------------------------|------------------|
| <i>Typhlodromus pyri</i> | Nymphs     | BAS 310 51 I, Natural substrate (bean leaf disks) | 7 days of exposure | 0.25 – 4 mL prep./ha, Fresh residues | Mortality, reproduction | LR <sub>50</sub> = 0.264 mL product/ha (= 13.7 mg a.s./ha)<br><br>No effects on reproduction up to 0.25 mL product/ha (12.5 mg a.s./ha).<br>Reproduction at higher doses not assessed | -                |

| Species                  | Life stage | Test substance, substrate                                                                                     | Time scale         | Dose (g/ha)                                                                                                                  | End point               | % effect <sup>1</sup>                                                                                                                                                                                                                                                                                                                                                                                                                                                                                                                                                                                                                                                                                                        | ER <sub>50</sub> |
|--------------------------|------------|---------------------------------------------------------------------------------------------------------------|--------------------|------------------------------------------------------------------------------------------------------------------------------|-------------------------|------------------------------------------------------------------------------------------------------------------------------------------------------------------------------------------------------------------------------------------------------------------------------------------------------------------------------------------------------------------------------------------------------------------------------------------------------------------------------------------------------------------------------------------------------------------------------------------------------------------------------------------------------------------------------------------------------------------------------|------------------|
| <i>Typhlodromus pyri</i> | Nymphs     | BAS 310 55 I,<br>Leaf discs from treated potted vine plants (either upper leaf surface or lower leaf surface) | 7 days of exposure | 9, 17, 30 g a.s./ha and 2 x 15 g a.s./ha (7-day interval),<br>Fresh or aged residues of 7, 28, 56, 84, 112, 140 and 168 days | Mortality, reproduction | <p><u>Exposure to fresh and aged-residues on lower leaf surface:</u><br/>no unacceptable effects (&lt; 50%) on survival and reproduction on DAT 28 at 180 mL/ha (9 g a.s./ha), on DAT 56 at 340 and 600 mL/ha (17 and 30 g a.s./ha) and on DAT 112 at 2 x 300 mL/ha (2 x 15 g a.s./ha)</p> <p><u>Exposure to fresh and aged-residues on upper leaf surface:</u><br/>no unacceptable effects (&lt;50%) on survival and reproduction on DAT 56 at 180 mL/ha (9 g a.s./ha). On DAT 168 at 340 mL/ha (17 g a.s./ha) the effect on reproduction of 50.3% was still slightly above the 50% trigger. Effects on survival &gt;50% still occurred at 600 mL/ha (30 g a.s./ha) and at 2 x 300 mL/ha (2 x 15 g a.s./ha) on DAT 168.</p> | -                |

| Species                          | Life stage | Test substance, substrate          | Time scale             | Dose (g/ha)                            | End point               | % effect <sup>1</sup>                                                                                                                                                                                                   | ER <sub>50</sub> |
|----------------------------------|------------|------------------------------------|------------------------|----------------------------------------|-------------------------|-------------------------------------------------------------------------------------------------------------------------------------------------------------------------------------------------------------------------|------------------|
| <i>Aphidius rhopalosiphi</i>     | Adults     | BAS 310 51 I, barley seedlings     | 48 h of exposure       | 3.76 – 120 mL prep./ha, fresh residues | Mortality, reproduction | LR <sub>50</sub> = 76.1 mL product/ha (3.80 g a.s./ha)<br><br>10.7-20.0% effects on reproduction up to 60 mL product/ha (2.99 mg a.s./ha). Reproduction at higher doses not assessed.                                   | -                |
| <i>Coccinella septempunctata</i> | Larvae     | BAS 310 51 I, detached bean leaves | 11-15 days of exposure | 0.125 – 2 mL prep./ha, fresh residues  | Mortality, reproduction | LR <sub>50</sub> = 1.04 mL product/ha (= 51.90 mg a.s./ha)<br><br>Reproduction was comparable to the control for treatments up to 1.0 mL product/ha (=49.90 mg a.s./ha). Reproduction at higher rates was not assessed. | -                |
| <i>Chrysoperla carnea</i>        | Larvae     | BAS 310 51 I, detached bean leaves | 13-19 days of exposure | 2 – 160 mL prep./ha, fresh residues    | Mortality, reproduction | LR <sub>50</sub> = 58.7 mL product/ha (= 2.88 g a.s./ha)<br><br>Reproduction was comparable to the control for treatments up to 80 mL product/ha (= 3.99 g a.s./ha). Reproduction at higher rates was not assessed.     | -                |

| Species                    | Life stage | Test substance, substrate                  | Time scale          | Dose (g/ha)                           | End point               | % effect <sup>1</sup>                                                                                                                                                                                | ER <sub>50</sub> |
|----------------------------|------------|--------------------------------------------|---------------------|---------------------------------------|-------------------------|------------------------------------------------------------------------------------------------------------------------------------------------------------------------------------------------------|------------------|
| <i>Orius laevigatus</i>    | Nymphs     | BAS 310 51 I, detached bean leaves         | 9 days of exposure  | 0.5 – 8.0 mL prep./ha, fresh residues | Mortality, reproduction | LR <sub>50</sub> = 2.24 mL product/ha (= 111.78 mg a.s./ha)<br><br>11.61 – 18.02 % effects on reproduction up to 2 mL product/ha (= 99.8 mg a.s./ha). Reproduction at higher rates was not assessed. | -                |
| <i>Aleochara bilineata</i> | Adults     | BAS 310 51 I, on a worst-case natural soil | 28 days of exposure | 7.6 – 120 mL prep./ha, fresh residues | reproduction            | 26.3 % effect on reproduction at 120 mL product/ha (5.99 g a.s./ha)                                                                                                                                  | -                |

<sup>1</sup> A positive value indicates a decrease in reproduction, relative to the control

**Risk assessment based on extended lab and aged residue tests** for – Cereals at 1-2 x 10 g a.s./ha, oilseed rape at 1-2 x 10 g a.s./ha, lettuce and leafy cabbage at 1-2 x 10 g a.s./ha or 1 x 20 g a.s./ha.

For the use in cucumber and courgette at 1-2 x 15 g a.s./ha or 1 x 30 g a.s./ha, which is restricted to permanent greenhouses, no exposure to bees is expected. Therefore, no risk assessment is required for this use.

| Species                  | Endpoints                                                                                                                                                                                                                                                                                                                                                                                                                                                                                                                                                                                                                             | In-field rate       | Off-field rate <sup>1</sup>         |
|--------------------------|---------------------------------------------------------------------------------------------------------------------------------------------------------------------------------------------------------------------------------------------------------------------------------------------------------------------------------------------------------------------------------------------------------------------------------------------------------------------------------------------------------------------------------------------------------------------------------------------------------------------------------------|---------------------|-------------------------------------|
| <i>Typhlodromus pyri</i> | LR <sub>50</sub> = 0.0137 g a.s./ha<br>No effects > 50% on reproduction up to 0.0125 g a.s./ha                                                                                                                                                                                                                                                                                                                                                                                                                                                                                                                                        | <b>20 g a.s./ha</b> | <b>0.0554 g a.s./ha<sup>2</sup></b> |
| <i>Typhlodromus pyri</i> | <u>Exposure to lower leaf surface:</u><br>no unacceptable effects on survival and reproduction on DAT 28 at 180 mL/ha (9 g a.s./ha), on DAT 56 at 340 and 600 mL/ha (17 and 30 g a.s./ha) and on DAT 112 at 2 x 300 mL/ha (2 x 15 g a.s./ha)<br><br><u>Exposure to upper leaf surface:</u><br>no unacceptable effects on survival and reproduction on DAT 56 at 180 mL/ha (9 g a.s./ha). On DAT 168 at 340 mL/ha (17 g a.s./ha) the effect on reproduction of 50.3% was still slightly above the 50% trigger. Effects on survival >50% still occurred at 600 mL/ha (30 g a.s./ha) and at 2 x 300 mL/ha (2 x 15 g a.s./ha) on DAT 168. | <b>20 g a.s./ha</b> | - <sup>4</sup>                      |

| Species                          | Endpoints                                                                                      | In-field rate       | Off-field rate <sup>1</sup>         |
|----------------------------------|------------------------------------------------------------------------------------------------|---------------------|-------------------------------------|
| <i>Aphidius rhopalosiphi</i>     | LR <sub>50</sub> = 3.80 g a.s./ha<br>No effects > 50% on reproduction up to 2.99 g a.s./ha     | <b>20 g a.s./ha</b> | 0.554 g a.s./ha <sup>3</sup>        |
| <i>Coccinella septempunctata</i> | LR <sub>50</sub> = 0.0519 g a.s./ha<br>No effects > 50% on reproduction up to 0.0499 g a.s./ha | <b>20 g a.s./ha</b> | <b>0.0554 g a.s./ha<sup>2</sup></b> |
| <i>Chrysoperla carnea</i>        | LR <sub>50</sub> = 2.88 g a.s./ha<br>No effects > 50% on reproduction up to 3.99 g a.s./ha     | <b>20 g a.s./ha</b> | 0.0554 g a.s./ha <sup>2</sup>       |
| <i>Orius laevigatus</i>          | LR <sub>50</sub> = 0.112 g a.s./ha<br>No effects > 50% on reproduction up to 0.0998 g a.s./ha  | <b>20 g a.s./ha</b> | 0.0554 g a.s./ha <sup>2</sup>       |
| <i>Aleochara bilineata</i>       | No unacceptable effects on reproduction up to 5.99 g a.s./ha                                   | <b>20 g a.s./ha</b> | 0.0554 g a.s./ha <sup>2</sup>       |

<sup>1</sup>Off-field rate a calculated for the use in lettuce and leafy cabbage, for which a distance of 1 m was assumed to calculate the drift rate. The off-field exposure for this use covers the off-field exposure for the proposed use in cereals and oilseed rape.

<sup>2</sup>off-field rate calculated for 2D exposure

<sup>3</sup>off field rate calculated for 3D exposure

<sup>4</sup>An aged-residue study is not considered appropriate to address the off-field risk. In order to allow re-colonisation of the in-field area, which is more realistic than real recovery in case of an insecticide, no effect should be allowed to occur in the off-field area

### Semi-field tests

No additional semi-field tests have been submitted

### Field studies

Three new field studies with the representative formulation BAS 310 55 I have been submitted, of which two assess the effects on mites in in-crop areas, and one assesses the effects on arthropod communities in off-crop areas. The study in off-crop areas consisted of two assessments, which are reported in two separate study reports. Both assessments were performed at the same time on the same field, and investigated either the complete non-target arthropod community or the non-target mite community. In addition, two in-crop field studies have been carried out with the SC formulation BAS 310 03 I. Although performed with another formulation, these two in-crop field studies are considered to be representative for the risk assessment for BAS 310 55 I

| Species                                                                | Test substance | Crop                             | Application rates/ effects                                                                                                                                                                                                                                                                                                                                                                                                  |
|------------------------------------------------------------------------|----------------|----------------------------------|-----------------------------------------------------------------------------------------------------------------------------------------------------------------------------------------------------------------------------------------------------------------------------------------------------------------------------------------------------------------------------------------------------------------------------|
| <b>In-crop field studies</b>                                           |                |                                  |                                                                                                                                                                                                                                                                                                                                                                                                                             |
| Predatory mites<br>(Acari:<br>Phytoseiidae),<br>Natural<br>populations | BAS 310 55 I   | Vineyard<br>(Northern<br>France) | 2 × 0.15 L product/ha (= 2 × 7.6 g a.s./ha)<br>→ At the end of the study period (112 days after the 2 <sup>nd</sup> application), mite populations in the plots treated with BAS 310 55 I were recovering. However, there was still a statistically significant effect of 37.46% compared to the control. As this effect is < 50%, it was considered that there were no unacceptable effects at 2 × 0.15 L BAS 310 55 I/ha. |

|                                                            |              |                                  |                                                                                                                                                                                                                                                                                                                                                                                                                                                                           |
|------------------------------------------------------------|--------------|----------------------------------|---------------------------------------------------------------------------------------------------------------------------------------------------------------------------------------------------------------------------------------------------------------------------------------------------------------------------------------------------------------------------------------------------------------------------------------------------------------------------|
| Predatory mites (Acari: Phytoseiidae), Natural populations | BAS 310 55 I | Vineyard (Southern France)       | $2 \times 0.15 \text{ L product/ha}$ (= $2 \times 7.6 \text{ g a.s./ha}$ )<br>→ At the end of the study period (56 days after the 2 <sup>nd</sup> application), mite populations in the plots treated with BAS 310 55 I were recovering. However, there was still a statistically significant effect of 38.51% compared to the control. As this effect is < 50%, it was considered that there were no unacceptable effects at $2 \times 0.15 \text{ L BAS 310 55 I/ha}$ . |
| Natural arthropod populations                              | BAS 310 03 I | Cereals (Germany)                | $2 \times 15 \text{ g a.s./ha}$ and $3 \times 15 \text{ g a.s./ha}$<br>→ short-term effects on a wide range of non-target arthropods; no unacceptable long-term effects beyond one season                                                                                                                                                                                                                                                                                 |
| Natural arthropod populations                              | BAS 310 03 I | Cereals/fallow (Southern France) | $2 \times 15 \text{ g a.s./ha}$ and $3 \times 15 \text{ g a.s./ha}$<br>→ short-term effects on a wide range of non-target arthropods; no unacceptable long-term effects beyond one season                                                                                                                                                                                                                                                                                 |
| Off-crop field studies                                     |              |                                  |                                                                                                                                                                                                                                                                                                                                                                                                                                                                           |
| Natural arthropod populations                              | BAS 310 55 I | Grassland (South-West France)    | $1, 3, 9, 27$ and $52 \text{ mL product/ha}$<br>→ slight effects on 2 taxa at $9 \text{ mL product/ha}$ , no unacceptable long-term effects. Short-term effects on 2 taxa at $27 \text{ mL product/ha}$ and on 6 taxa at $52 \text{ mL product/ha}$ . Recovery occurred within 2 months after application<br>community NOER = $52 \text{ mL/ha}$<br>population NOEAER = $9 \text{ mL/ha}$<br>population NOER = $1 \text{ mL/ha}$ <sup>1)</sup>                            |
| Natural mite populations                                   | BAS 310 55 I | Grassland (South-West France)    | $1, 3, 9, 27$ and $52 \text{ mL product/ha}$<br>→ no unacceptable long-term effects on non-target mites<br>community NOER = $52 \text{ mL/ha}$<br>population NOER = $52 \text{ mL/ha}$                                                                                                                                                                                                                                                                                    |
| <b>Additional specific test</b>                            |              |                                  |                                                                                                                                                                                                                                                                                                                                                                                                                                                                           |
| No additional specific tests have been submitted.          |              |                                  |                                                                                                                                                                                                                                                                                                                                                                                                                                                                           |

<sup>1)</sup> At Pesticides Peer Review Meeting 177, the NOER from this study was set at  $1 \text{ mL product/ha}$ , based on a visual observation of the results, which indicated effects of more than 50% for some taxa at  $3 \text{ mL product/ha}$ , even though this is not supported by statistical relevance. There is however uncertainty on the statistical power of this field study. Taking this into account, the endpoints from this study should be used with care. Member States should pay attention on whether to conditions in the study are representative for the conditions in their country

**Risk assessment based on field studies** for – Cereals at  $1\text{-}2 \times 10 \text{ g a.s./ha}$ , oilseed rape at  $1\text{-}2 \times 10 \text{ g a.s./ha}$ , lettuce and leafy cabbage at  $1\text{-}2 \times 10 \text{ g a.s./ha}$  or  $1 \times 20 \text{ g a.s./ha}$ , and cucumber and courgette at  $1\text{-}2 \times 15 \text{ g a.s./ha}$  or  $1 \times 30 \text{ g a.s./ha}$ .

#### In-field risk assessment:

As the two available field studies which were performed with BAS 310 55 I were performed with an application rate below the maximum intended use pattern, no conclusion can be drawn from these studies in the higher tier assessment. However, based on the results from the studies with the formulation BAS 310 03 I, it can be concluded that an application of up to  $3 \times 15 \text{ g a.s./ha}$  caused no unacceptable effect on the population development of ground- and foliar dwelling arthropods under field conditions in cereals (no long-term effects beyond one season). Therefore, the in-field risk to non-target terrestrial arthropods can be considered acceptable for the proposed uses of BAS 310 55 I in cereals. At Pesticides Peer Review Meeting 177, it was agreed that the results from these studies can be extrapolated to oilseed rape, but not to lettuce and leafy vegetables. Consequently, the in-field risk to non-target terrestrial arthropods can also be considered acceptable for the proposed uses of BAS 310 55 I in oilseed rape. For the proposed uses in lettuce and leafy vegetables, a higher tier in-field risk assessment for non-target terrestrial arthropods could not be performed, and an acceptable risk

| could not be concluded.                                                                                                                                                                                                                                                                                                                                                                                                                                                                                                                                                                                                                                               |                              |     |                          |                                        |                          |                              |                 |
|-----------------------------------------------------------------------------------------------------------------------------------------------------------------------------------------------------------------------------------------------------------------------------------------------------------------------------------------------------------------------------------------------------------------------------------------------------------------------------------------------------------------------------------------------------------------------------------------------------------------------------------------------------------------------|------------------------------|-----|--------------------------|----------------------------------------|--------------------------|------------------------------|-----------------|
| <b>Off-field risk assessment:</b>                                                                                                                                                                                                                                                                                                                                                                                                                                                                                                                                                                                                                                     |                              |     |                          |                                        |                          |                              |                 |
| From the available studies in the off-crop area, a NOER of 0.051 g a.s./ha was derived following expert consultation at Pesticides Peer Review Meeting 177. Although there were some uncertainties regarding this endpoint, which are mainly related to the statistical power of the study, it was agreed that this endpoint could be used in a higher-tier off-field risk assessment, without an additional safety factor. This results in a Regulatory Acceptable Concentration (RAC) for the off-field area of 0.051 g a.s./ha. Based on this RAC, the risk could be considered acceptable for all proposed uses, provided that no-spray buffer zones are applied. |                              |     |                          |                                        |                          |                              |                 |
| Crop                                                                                                                                                                                                                                                                                                                                                                                                                                                                                                                                                                                                                                                                  | Application rate (g a.s./ha) | MAF | In-field PER (g a.s./ha) | Distance from the edge of the crop (m) | Drift factor % drift/100 | 3D Off-field PER (g a.s./ha) | RAC (g a.s./ha) |
| Cereals                                                                                                                                                                                                                                                                                                                                                                                                                                                                                                                                                                                                                                                               | 10                           | 1.7 | 17                       | 1                                      | 0.0238                   | <b>0.405</b>                 | 0.051           |
|                                                                                                                                                                                                                                                                                                                                                                                                                                                                                                                                                                                                                                                                       |                              |     |                          | 5                                      | 0.0047                   | <b>0.080</b>                 |                 |
|                                                                                                                                                                                                                                                                                                                                                                                                                                                                                                                                                                                                                                                                       |                              |     |                          | 10                                     | 0.0024                   | 0.041                        |                 |
| Oilseed rape                                                                                                                                                                                                                                                                                                                                                                                                                                                                                                                                                                                                                                                          | 10                           | 1.7 | 17                       | 1                                      | 0.0238                   | <b>0.405</b>                 |                 |
|                                                                                                                                                                                                                                                                                                                                                                                                                                                                                                                                                                                                                                                                       |                              |     |                          | 5                                      | 0.0047                   | <b>0.080</b>                 |                 |
|                                                                                                                                                                                                                                                                                                                                                                                                                                                                                                                                                                                                                                                                       |                              |     |                          | 10                                     | 0.0024                   | 0.041                        |                 |
| Lettuce                                                                                                                                                                                                                                                                                                                                                                                                                                                                                                                                                                                                                                                               | 20                           | 1   | 20                       | 1                                      | 0.0277                   | <b>0.554</b>                 |                 |
|                                                                                                                                                                                                                                                                                                                                                                                                                                                                                                                                                                                                                                                                       |                              |     |                          | 5                                      | 0.0057                   | <b>0.114</b>                 |                 |
|                                                                                                                                                                                                                                                                                                                                                                                                                                                                                                                                                                                                                                                                       |                              |     |                          | 10                                     | 0.0029                   | <b>0.058</b>                 |                 |
|                                                                                                                                                                                                                                                                                                                                                                                                                                                                                                                                                                                                                                                                       |                              |     |                          | 15                                     | 0.0020                   | 0.040                        |                 |
| Leafy cabbage                                                                                                                                                                                                                                                                                                                                                                                                                                                                                                                                                                                                                                                         | 20                           | 1   | 20                       | 1                                      | 0.0277                   | <b>0.554</b>                 |                 |
|                                                                                                                                                                                                                                                                                                                                                                                                                                                                                                                                                                                                                                                                       |                              |     |                          | 5                                      | 0.0057                   | <b>0.114</b>                 |                 |
|                                                                                                                                                                                                                                                                                                                                                                                                                                                                                                                                                                                                                                                                       |                              |     |                          | 10                                     | 0.0029                   | <b>0.058</b>                 |                 |
|                                                                                                                                                                                                                                                                                                                                                                                                                                                                                                                                                                                                                                                                       |                              |     |                          | 15                                     | 0.0020                   | 0.040                        |                 |

**Effects on non-target soil meso- and macro fauna; effects on soil nitrogen transformation (Regulation (EU) N° 283/2013, Annex Part A, points 8.4, 8.5, and Regulation (EU) N° 284/2013 Annex Part A, points 10.4, 10.5)**

| Test organism                       | Test substance     | Application method of test a.s./ OM <sup>1</sup>      | Time scale | End point                       | Toxicity                                                                       |
|-------------------------------------|--------------------|-------------------------------------------------------|------------|---------------------------------|--------------------------------------------------------------------------------|
| Earthworms                          |                    |                                                       |            |                                 |                                                                                |
| Earthworm ( <i>Eisenia fetida</i> ) | Alpha-cypermethrin | Mixed with soil after application to quartz sand /10% | Chronic    | Mortality, growth, reproduction | NOEC ≥ 4 mg a.s./kg d.w. soil<br>NOEC <sub>CORR</sub> ≥ 2 mg a.s./kg d.w. soil |

| Test organism                       | Test substance     | Application method of test a.s./ OM <sup>1</sup>                     | Time scale | End point                             | Toxicity                                                                                                                                                                                                                                                                                                                                                            |
|-------------------------------------|--------------------|----------------------------------------------------------------------|------------|---------------------------------------|---------------------------------------------------------------------------------------------------------------------------------------------------------------------------------------------------------------------------------------------------------------------------------------------------------------------------------------------------------------------|
| Earthworm ( <i>Eisenia fetida</i> ) | BAS 310 51 I       | Mixed with soil as a solution / 5%                                   | Chronic    | Mortality<br><br>Growth, reproduction | <p>EC<sub>50</sub> &gt; 22.50 mg prep./kg d.w. soil<br/>(&gt; 1.28 mg a.s./kg d.w. soil)</p> <p>EC<sub>50,CORR</sub> &gt; 11.28 mg prep./kg d.w. soil<br/>(&gt; 0.64 mg a.s./kg d.w. soil)</p> <p>NOEC ≥ 22.55 mg prep./kg d.w. soil<br/>(≥ 1.28 mg a.s./kg d.w.soil)</p> <p>NOEC<sub>CORR</sub> ≥ 11.28 mg prep./kg d.w. soil<br/>(≥ 0.64 mg a.s./kg d.w.soil)</p> |
| Earthworm ( <i>Eisenia fetida</i> ) | Alpha-cypermethrin | Mixed with soil as a solution in acetone / natural soil with 2.2% OM | Chronic    | Mortality<br><br>Growth, reproduction | <p>LC<sub>50</sub> = 762 mg a.s./kg d.w. soil</p> <p>LC<sub>50,CORR</sub> = 381 mg a.s./kg d.w. soil</p> <p>EC<sub>50</sub> = 31 mg a.s./kg d.w. soil</p> <p>EC<sub>50,CORR</sub> = 15.5 mg a.s./kg d.w. soil</p> <p>NOEC &lt; 4.65 mg a.s./kg d.w.soil</p> <p>NOEC<sub>CORR</sub> &lt; 2.33 mg a.s./kg d.w.soil</p>                                                |
| Earthworm ( <i>Eisenia fetida</i> ) | Alpha-cypermethrin | Mixed with soil as a solution in acetone / natural soil with 2.1% OM | Chronic    | Growth, reproduction                  | <p>EC<sub>50</sub> = 23.8 mg a.s./kg d.w. soil<sup>2</sup></p> <p>EC<sub>50,CORR</sub> = 11.9 mg a.s./kg d.w. soil<sup>2</sup></p> <p>EC<sub>10</sub> = 4.8 mg a.s./kg d.w. soil<sup>2</sup></p> <p>EC<sub>10,CORR</sub> = 2.4 mg a.s./kg d.w. soil<sup>2</sup></p>                                                                                                 |



| Test organism                               | Test substance     | Application method of test a.s./ OM <sup>1</sup>                     | Time scale | End point                             | Toxicity                                                                                                                                                                                                                                                                                                                                                                                           |
|---------------------------------------------|--------------------|----------------------------------------------------------------------|------------|---------------------------------------|----------------------------------------------------------------------------------------------------------------------------------------------------------------------------------------------------------------------------------------------------------------------------------------------------------------------------------------------------------------------------------------------------|
| Potworm<br>( <i>Enchytraeus crypticus</i> ) | Alpha-cypermethrin | Mixed with soil as a solution in acetone / natural soil with 2.2% OM | Chronic    | Mortality<br><br>Growth, reproduction | LC <sub>50</sub> = 31.4 mg a.s./kg d.w. soil<br>LC <sub>50,CORR</sub> = 15.7 mg a.s./kg d.w. soil<br>EC <sub>50</sub> = 4.91 mg a.s./kg d.w. soil<br>EC <sub>50,CORR</sub> = 2.46 mg a.s./kg d.w. soil<br>EC <sub>10</sub> = 0.99 mg a.s./kg d.w. soil<br>EC <sub>10,CORR</sub> = 0.495 mg a.s./kg d.w. soil<br>NOEC = 2.51 mg a.s./kg d.w.soil<br>NOEC <sub>CORR</sub> = 1.26 mg a.s./kg d.w.soil |
| Potworm<br>( <i>Enchytraeus crypticus</i> ) | Alpha-cypermethrin | Mixed with soil as a solution in acetone / natural soil with 2.1% OM | Chronic    | Growth, reproduction                  | EC <sub>50</sub> = 0.76 mg a.s./kg d.w. soil <sup>2</sup><br>EC <sub>50,CORR</sub> = 0.38 mg a.s./kg d.w. soil <sup>2</sup><br>EC <sub>10</sub> = 0.12 mg a.s./kg d.w. soil <sup>2</sup><br>EC <sub>10,CORR</sub> = 0.06 mg a.s./kg d.w. soil <sup>2</sup>                                                                                                                                         |
| Earthworm<br>( <i>Eisenia fetida</i> )      | cis-DCVA           | Mixed with soil after application to quartz sand /10%                | Chronic    | Reproduction                          | NOEC = 6.25 mg/kg d.w. soil<br>NOEC <sub>CORR</sub> = 3.13 mg/kg d.w. soil                                                                                                                                                                                                                                                                                                                         |
| Earthworm<br>( <i>Eisenia fetida</i> )      | 3-PBA              | Mixed with soil after application to quartz sand /10%                | Chronic    | Reproduction                          | NOEC = 4.8 mg/kg d.w. soil<br>NOEC <sub>CORR</sub> = 2.4 mg/kg d.w. soil                                                                                                                                                                                                                                                                                                                           |
| Other soil macroorganisms                   |                    |                                                                      |            |                                       |                                                                                                                                                                                                                                                                                                                                                                                                    |

| Test organism           | Test substance     | Application method of test a.s./ OM <sup>1</sup>                     | Time scale | End point                     | Toxicity                                                                                                                                                                                                                                                                                                                                                                                                                                                                                                                                                                                                                                                                                                                                                                                                                                         |
|-------------------------|--------------------|----------------------------------------------------------------------|------------|-------------------------------|--------------------------------------------------------------------------------------------------------------------------------------------------------------------------------------------------------------------------------------------------------------------------------------------------------------------------------------------------------------------------------------------------------------------------------------------------------------------------------------------------------------------------------------------------------------------------------------------------------------------------------------------------------------------------------------------------------------------------------------------------------------------------------------------------------------------------------------------------|
| <i>Folsomia candida</i> | Alpha-cypermethrin | Mixed with soil as a solution in acetone / natural soil with 2.2% OM | Chronic    | Mortality<br><br>Reproduction | <p>LC<sub>50</sub> &gt; 258 mg a.s./kg d.w. soil</p> <p>LC<sub>50,CORR</sub> &gt; 129 mg a.s./kg d.w. soil</p> <p>EC<sub>50</sub> = 60.3 mg a.s./kg d.w. soil</p> <p>EC<sub>50,CORR</sub> = 30.15 mg a.s./kg d.w. soil</p> <p>EC<sub>10</sub> = 3.69 mg a.s./kg d.w. soil</p> <p>EC<sub>10,CORR</sub> = 1.845 mg a.s./kg d.w. soil</p> <p>NOEC = 8.43 mg a.s./kg d.w. soil</p> <p>NOEC<sub>CORR</sub> = 4.215 mg a.s./kg d.w. soil</p>                                                                                                                                                                                                                                                                                                                                                                                                           |
| <i>Folsomia candida</i> | BAS 310 51 I       | Mixed with soil as a solution / 5%                                   | Chronic    | Mortality<br><br>Reproduction | <p>LC<sub>50</sub> &gt; 100 mg prep./kg d.w. soil<br/>(5.0 mg a.s./kg d.w. soil)</p> <p>LC<sub>50,CORR</sub> &gt; 2.5 mg a.s./kg d.w. soil</p> <p>NOEC = 50 mg prep./kg d.w. soil<br/>(2.5 mg a.s./kg d.w. soil)</p> <p>NOEC<sub>CORR</sub> = 1.25 mg a.s./kg d.w. soil</p> <p>EC<sub>50</sub> = 82.1 mg prep./kg d.w. soil<br/>(4.11 mg a.s./kg d.w. soil)</p> <p>EC<sub>50,CORR</sub> = 2.055 mg a.s./kg d.w. soil</p> <p>EC<sub>20</sub> = 39.5 mg prep./kg d.w. soil<br/>(1.98 mg a.s./kg d.w. soil)</p> <p>EC<sub>20,CORR</sub> = 0.99 mg a.s./kg d.w. soil</p> <p>EC<sub>10</sub> = 26.9 mg prep./kg d.w. soil<br/>(1.35 mg a.s./kg d.w. soil)</p> <p>EC<sub>10,CORR</sub> = 0.675 mg a.s./kg d.w. soil</p> <p>NOEC = 25 mg prep./kg d.w. soil<br/>(1.25 mg a.s./kg d.w. soil)</p> <p>NOEC<sub>CORR</sub> = 0.625 mg a.s./kg d.w. soil</p> |

| Test organism              | Test substance     | Application method of test a.s./ OM <sup>1</sup>                     | Time scale | End point            | Toxicity                                                                                                                                                                                                                                                |
|----------------------------|--------------------|----------------------------------------------------------------------|------------|----------------------|---------------------------------------------------------------------------------------------------------------------------------------------------------------------------------------------------------------------------------------------------------|
| <i>Folsomia candida</i>    | <i>cis</i> -DCVA   | Mixed with soil after application to quartz sand / 5%                | Chronic    | Mortality            | LC <sub>50</sub> > 8 mg /kg d.w. soil<br>LC <sub>50,CORR</sub> > 4 mg/kg d.w. soil<br>NOEC ≥ 8 mg/kg d.w. soil<br>NOEC <sub>CORR</sub> ≥ 4 mg/kg d.w. soil                                                                                              |
|                            |                    |                                                                      |            | Reproduction         | EC <sub>50</sub> > 8 mg /kg d.w. soil<br>EC <sub>50,CORR</sub> > 4 mg/kg d.w. soil<br>NOEC ≥ 8 mg/kg d.w. soil<br>NOEC <sub>CORR</sub> ≥ 4 mg/kg d.w. soil                                                                                              |
| <i>Folsomia candida</i>    | 3-PBA              | Mixed with soil after application to quartz sand / 5%                | Chronic    | Mortality            | LC <sub>50</sub> = 400 mg /kg d.w. soil<br>LC <sub>50,CORR</sub> = 200 mg/kg d.w. soil<br>NOEC = 200 mg/kg d.w. soil<br>NOEC <sub>CORR</sub> = 100 mg/kg d.w. soil                                                                                      |
|                            |                    |                                                                      |            | Reproduction         | EC <sub>50</sub> > 400 mg /kg d.w. soil<br>EC <sub>50,CORR</sub> > 200 mg/kg d.w. soil<br>NOEC = 200 mg/kg d.w. soil<br>NOEC <sub>CORR</sub> = 100 mg/kg d.w. soil                                                                                      |
| <i>Hypoaspis aculeifer</i> | Alpha-cypermethrin | Mixed with soil as a solution in acetone / natural soil with 2.1% OM | Chronic    | Growth, reproduction | EC <sub>50</sub> = 3.2 mg a.s./kg d.w. soil <sup>2</sup><br>EC <sub>50,CORR</sub> = 1.6 mg a.s./kg d.w. soil <sup>2</sup><br>EC <sub>10</sub> = 0.5 mg a.s./kg d.w. soil <sup>2</sup><br>EC <sub>10,CORR</sub> = 0.25 mg a.s./kg d.w. soil <sup>2</sup> |

| Test organism              | Test substance   | Application method of test a.s./ OM <sup>1</sup>      | Time scale | End point    | Toxicity                                                                                                                                                                                                                                                                    |
|----------------------------|------------------|-------------------------------------------------------|------------|--------------|-----------------------------------------------------------------------------------------------------------------------------------------------------------------------------------------------------------------------------------------------------------------------------|
| <i>Hypoaspis aculeifer</i> | BAS 310 55 I     | Mixed with soil as a solution / 5%                    | Chronic    | Mortality    | <p>LC<sub>50</sub> &gt; 100 mg prep./kg d.w. soil<br/>(5.0 mg a.s./kg d.w. soil)</p> <p>LC<sub>50,CORR</sub> &gt; 2.5 mg a.s./kg d.w. soil</p> <p>NOEC ≥ 100 mg prep./kg d.w. soil<br/>(5.0 mg a.s./kg d.w. soil)</p> <p>NOEC<sub>CORR</sub> ≥ 2.5 mg a.s./kg d.w. soil</p> |
|                            |                  |                                                       |            | Reproduction | <p>EC<sub>50</sub> &gt; 100 mg prep./kg d.w. soil<br/>(5.0 mg a.s./kg d.w. soil)</p> <p>EC<sub>50,CORR</sub> = 2.5 mg a.s./kg d.w. soil</p> <p>NOEC = 25 mg prep./kg d.w. soil<br/>(1.25 mg a.s./kg d.w. soil)</p> <p>NOEC<sub>CORR</sub> = 0.625 mg a.s./kg d.w. soil</p>  |
| <i>Hypoaspis aculeifer</i> | <i>cis</i> -DCVA | Mixed with soil after application to quartz sand / 5% | Chronic    | Mortality    | <p>LC<sub>50</sub> &gt; 500 mg /kg d.w. soil</p> <p>LC<sub>50,CORR</sub> &gt; 250 mg/kg d.w. soil</p> <p>NOEC ≥ 500 mg/kg d.w. soil</p> <p>NOEC<sub>CORR</sub> ≥ 250 mg/kg d.w. soil</p>                                                                                    |
|                            |                  |                                                       |            | Reproduction | <p>EC<sub>50</sub> &gt; 500 mg /kg d.w. soil</p> <p>EC<sub>50,CORR</sub> &gt; 250 mg/kg d.w. soil</p> <p>NOEC = 125 mg/kg d.w. soil</p> <p>NOEC<sub>CORR</sub> = 62.5 mg/kg d.w. soil</p>                                                                                   |

| Test organism              | Test substance | Application method of test a.s./ OM <sup>1</sup>      | Time scale | End point    | Toxicity                                                                                                                                                             |
|----------------------------|----------------|-------------------------------------------------------|------------|--------------|----------------------------------------------------------------------------------------------------------------------------------------------------------------------|
| <i>Hypoaspis aculeifer</i> | 3-PBA          | Mixed with soil after application to quartz sand / 5% | Chronic    | Mortality    | LC <sub>50</sub> >1000 mg /kg d.w. soil<br>LC <sub>50,CORR</sub> > 500 mg/kg d.w. soil<br>NOEC ≥ 1000 mg/kg d.w. soil<br>NOEC <sub>CORR</sub> ≥ 500 mg/kg d.w. soil  |
|                            |                |                                                       |            | Reproduction | EC <sub>50</sub> > 1000 mg /kg d.w. soil<br>EC <sub>50,CORR</sub> > 500 mg/kg d.w. soil<br>NOEC ≥ 1000 mg/kg d.w. soil<br>NOEC <sub>CORR</sub> ≥ 500 mg/kg d.w. soil |

<sup>1</sup>To indicate whether the test substance was oversprayed/to indicate the organic content of the test soil (e.g. 5 % or 10 %);

<sup>2</sup>Endpoint derived from a study investigating the effects of alpha-cypermethrin on soil organisms communities. As SANCO/10329/2002 rev. 2 does not foresee testing of soil organisms communities, these endpoints are considered as supportive information only.

#### Higher tier testing (e.g. modelling or field studies)

A field study to test the potential effects and potential recovery of field populations of earthworms after application of BAS 310 55 I at a rate of 0.3 L and 0.6 L/ha (equivalent to 15.3 and 30.7 g a.s./ha). Application of 0.3 L BAS 310 55 I/ha had no adverse effects on the field populations of earthworms. The application of 0.6 L BAS 310 55 I also had no adverse effects on total earthworm abundance and biomass but caused a statistically significant reduction in adult biomass of *A. caliginosa* about 11 months after application. However, this reduction was ecologically not relevant (reduction < 30%).

|                         |                    |                                                                    |                                                                                  |
|-------------------------|--------------------|--------------------------------------------------------------------|----------------------------------------------------------------------------------|
| Nitrogen transformation | Alpha-cypermethrin | Maximum tested rate of 100 mg a.s./kg d.w. soil; silty sand soil   | 4.47 % effect at day 28 at 100 mg a.s./kg d.w.soil.                              |
|                         | BAS 310 51 I       | Maximum tested rate of 7.97 mg prep./kg d.w. soil; loamy sand soil | 3.9% effect at day 28 at 7.97 mg prep./kg d.w. soil (= 0.4 mg a.s./kg d.w. soil) |
|                         | <i>cis</i> -DCVA   | Maximum tested rate of 0.0114 mg/kg d.w. soil; loamy sand soil     | 7.09 % effect at day 28 at 0.0114 mg/kg d.w. soil                                |
|                         | 3-PBA              | Maximum tested rate of 0.02 mg/kg d.w. soil; loamy sand soil       | 10.42 % effect at day 28 at 0.02 mg/kg d.w. soil.                                |

### Toxicity/exposure ratios for soil organisms

Cereals at 1-2 x 10 g a.s./ha, oilseed rape at 1-2 x 10 g a.s./ha, lettuce and leafy cabbage at 1-2 x 10 g a.s./ha or 1 x 20 g a.s./ha, and cucumber and courgette at 1-2 x 15 g a.s./ha or 1 x 30 g a.s./ha.

| Test organism              | Test substance     | Time scale | Soil PEC <sup>1</sup> | TER      | Trigger |
|----------------------------|--------------------|------------|-----------------------|----------|---------|
| Earthworms                 |                    |            |                       |          |         |
| <i>Eisenia fetida</i>      | Alpha-cypermethrin | Chronic    | 0.0200                | ≥ 100    | 5       |
|                            | BAS 310 55 I       | Chronic    | 0.0200                | ≥ 32     | 5       |
|                            | 3-PBA              | Chronic    | 0.0029                | 828      | 5       |
|                            | DCVA               | Chronic    | 0.0014                | 2232     | 5       |
| Other soil macroorganisms  |                    |            |                       |          |         |
| <i>Folsomia candida</i>    | Alpha-cypermethrin | Chronic    | 0.0200                | 92.25    | 5       |
|                            | BAS 310 55 I       | Chronic    | 0.0200                | 31.25    | 5       |
|                            | 3-PBA              | Chronic    | 0.0029                | 34483    | 5       |
|                            | DCVA               | Chronic    | 0.0014                | ≥ 2857   | 5       |
| <i>Hypoaspis aculeifer</i> | BAS 310 55 I       | Chronic    | 0.0200                | 31.25    | 5       |
|                            | 3-PBA              | Chronic    | 0.0029                | ≥ 172414 | 5       |
|                            | DCVA               | Chronic    | 0.0014                | 44643    | 5       |

<sup>1</sup>Maximum PEC soil values were used

### Effects on terrestrial non target higher plants (Regulation (EU) N° 283/2013, Annex Part A, point 8.6 and Regulation (EU) N° 284/2013 Annex Part A, point 10.6)

Screening data

|                                                     |
|-----------------------------------------------------|
| Not provided as ER <sub>50</sub> test are available |
|-----------------------------------------------------|

Laboratory dose response tests

| Species                                                                                                                                                                                                           | Test substance | ER <sub>50</sub> (g/ha) vegetative vigour | ER <sub>50</sub> (g/ha) emergence  | Exposure <sup>1</sup> (g/ha)             | TER              | Trigger |
|-------------------------------------------------------------------------------------------------------------------------------------------------------------------------------------------------------------------|----------------|-------------------------------------------|------------------------------------|------------------------------------------|------------------|---------|
| onion ( <i>Allium cepa</i> L.), oats ( <i>Avena sativa</i> L.), pea ( <i>Pisum sativum</i> L.), rapeseed ( <i>Brassica napus</i> L.), carrot ( <i>Daucus carota</i> L.), sunflower ( <i>Helianthus annuus</i> L.) | BAS 310 55 I   | > 2.0 L prep./ha (> 100 g a.s./ha)        | > 2.0 L prep./ha (> 100 g a.s./ha) | 1) 0.277 g a.s./ha<br>2) 0.554 g a.s./ha | 1) 361<br>2) 181 | 5       |

Extended laboratory studies : None

Semi-field and field test: None

Note: 1) For the use in cereals and oilseed rape; 2) for the use in lettuce and leafy cabbage;

<sup>1</sup> Exposure has been estimated based on Ganzelmeier drift data with a standard drift distance of 1 m for the use in cereals, oilseed rape, lettuce and leafy cabbage.

### Effects on biological methods for sewage treatment (Regulation (EU) N° 283/2013, Annex Part A, point 8.8)

|                       |                                   |
|-----------------------|-----------------------------------|
| Test type/organism    | end point                         |
| Activated sludge      | EC <sub>50</sub> > 1000 mg a.s./L |
| <i>Pseudomonas sp</i> | No data available                 |

### Monitoring data (Regulation (EU) N° 283/2013, Annex Part A, point 8.9 and Regulation (EU) N° 284/2013, Annex Part A, point 10.8)

No data available

### Definition of the residue for monitoring (Regulation (EU) N° 283/2013, Annex Part A, point 7.4.2) Ecotoxicologically relevant compounds<sup>1</sup>

|             |                    |
|-------------|--------------------|
| Compartment |                    |
| soil        | alpha-cypermethrin |
| water       | alpha-cypermethrin |
| sediment    | alpha-cypermethrin |
| groundwater | alpha-cypermethrin |

<sup>1</sup> metabolites are considered relevant when, based on the risk assessment, they pose a risk comparable or higher than the parent

**Classification and labelling with regard to ecotoxicological data (Regulation (EU) N° 283/2013, Annex Part A, Section 10)**

|                                                                                                                                                                                                |                                                                                                                                                                                                                                              |
|------------------------------------------------------------------------------------------------------------------------------------------------------------------------------------------------|----------------------------------------------------------------------------------------------------------------------------------------------------------------------------------------------------------------------------------------------|
| Substance                                                                                                                                                                                      | Alpha-cypermethrin                                                                                                                                                                                                                           |
| Harmonised classification according to Regulation (EC) No 1272/2008 and its Adaptations to Technical Process [Table 3.1 of Annex VI of Regulation (EC) No 1272/2008 as amended] <sup>7</sup> : | H400<br>H410<br>M-factor = 1000                                                                                                                                                                                                              |
| Peer review proposal <sup>8</sup> for harmonised classification according to Regulation (EC) No 1272/2008:                                                                                     | <p>Category Acute 1   Endpoint: 0.0126 µg a.s./L [48h EC50 <i>Chironomus riparius</i>]<br/>H400 (M-factor = 10000)</p> <p>Category Chronic 1   Endpoint: 0.0177 µg a.s./L [Chronic NOEC <i>Daphnia magna</i>]<br/>H410 (M-factor = 1000)</p> |

<sup>7</sup> Regulation (EC) No 1272/2008 of the European Parliament and of the Council of 16 December 2008 on classification, labelling and packaging of substances and mixtures, amending and repealing Directives 67/548/EEC and 1999/45/EC, and amending Regulation (EC) No 1907/2006. OJ L 353, 31.12.2008, 1-1355.

<sup>8</sup> It should be noted that harmonised classification and labelling is formally proposed and decided in accordance with Regulation (EC) No 1272/2008. Proposals for classification made in the context of the evaluation procedure under Regulation (EC) No 1107/2009 are not formal proposals.
